# Supplementary material
Source: PubMed Central journal article supplement (PMC4564013)
Supplement: NIHMS720092-supplement-Supporting_Information.pdf [file NIHMS720092-supplement-Supporting_Information.pdf]

# *Enantioselective 1,1-Arylborylation of Alkenes: Merging Chiral Anion Phase-Transfer with Pd-Catalysis*

Hosea M. Nelson,<sup>‡</sup> Brett D. Williams,<sup>‡</sup> Javier Miró,<sup>‡</sup> and F. Dean Toste\*

## Supporting Information

|                     |      |
|---------------------|------|
| General information | S-1  |
| Experimental        | S-2  |
| NMR Spectra         | S-11 |
| HPLC Data           | S-40 |

### I. General Information

Unless otherwise noted, all reagents were purchased from commercial suppliers and used without further purification. Chiral anion phase-transfer (CAPT) reactions were performed in 1-dram (0.5" X 1.75") vials equipped with a screw cap and stirred using a magnetic Teflon stir bar (1/2" X 5/16"), placed on the surface of a magnetic stir plate. Due to the heterogeneous nature of these reactions, it is important that fast and efficient stirring be maintained over the course of the reaction in order to obtain optimal results. Diethyl ether (Et<sub>2</sub>O) was used as purchased from Fischer Scientific. Thin-layer chromatography (TLC) analysis of reaction mixtures was performed using Merck silica gel 60 F254 TLC plates, and visualized under UV or by staining with ceric ammonium molybdate or KMnO<sub>4</sub>. Column chromatography was performed on Merck Silica Gel 60 Å, 230 X 400 mesh. Nuclear magnetic resonance (NMR) spectra were recorded using Bruker AV-600, AV-500, DRX-500, AVQ-400, AVB-400 and AV-300 spectrometers. <sup>1</sup>H and <sup>13</sup>C chemical shifts are reported in ppm downfield of tetramethylsilane and referenced to residual solvent peak (CHCl<sub>3</sub>, δH = 7.27 ppm and δC = 77.23 ppm; DMSO, δH = 2.50 and δC = 39.5 ppm; CH<sub>2</sub>Cl<sub>2</sub>, δH = 5.32 and δC = 53.8 ppm). Multiplicities are reported using the following abbreviations: s = singlet, d = doublet, t = triplet, q = quartet, app t = apparent triplet, m = multiplet, br = broad resonance. Solvent abbreviations are reported as follows: B<sub>2</sub>pin<sub>2</sub> = bis(pinicaloato)diboron, MTBE = Methyl *tert*-butyl ether, EtOAc = ethyl acetate, hex = hexanes, DCM = dichloromethane, Et<sub>2</sub>O = diethyl ether, MeOH = methanol, *i*PrOH = isopropanol, THF = tetrahydrofuran, DMF = N,N-dimethylformamide, Et<sub>3</sub>N = triethylamine. Mass spectral data were obtained from the Micro-Mass/Analytical Facility operated by the College of Chemistry, University of California, Berkeley or by usage of an Agilent Time of Flight (Q-TOF) mass spectrometer in ESI mode. Enantiomeric excesses were measured on a Shimadzu VP Series Chiral HPLC using Chiralpak IA, IB, or IC columns. The syntheses of TRIP, H8-TRIP, TCYP, and STRIP, have been previously reported. **Caution:** Although we have not experienced any problems during the preparation and handling of the aryldiazonium tetrafluoroborates reported herein, appropriate safety precautions should be taken due to the explosive nature of diazonium salts, including the use of a blast shield. Racemic CAPT products were synthesized utilizing homogeneous conditions in the absence of phase-transfer catalyst with THF as a solvent.

## I. Experimental

### General procedure A: Racemic three-component 1,1-arylborylation reaction for the synthesis of substrates (S1-S)

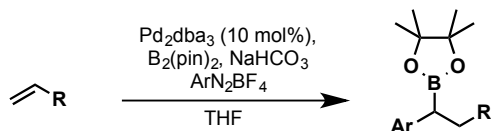

A 1 dram vial was charged with  $\text{B}_2(\text{pin})_2$  (1.2 equiv.),  $\text{Pd}_2\text{dba}_3$  (5 mol%),  $\text{NaHCO}_3$  (1.2 equiv.), the  $\text{ArN}_2\text{BF}_4$  (1 equiv.). To the solid reagents was added a solution of the appropriate olefin (1 equiv.) in THF (0.086 M). The headspace of the reaction vessel was sparged with  $\text{N}_2$  for ca. 0.5 min., and then the vial was capped and the heterogeneous reaction mixture was stirred vigorously. The reaction progress monitored *via* TLC analysis. Upon completion the reaction was concentrated *in vacuo* and the crude reactions were purified by flash column chromatography (EtOAc/Hexanes) to provide pure boronic esters.

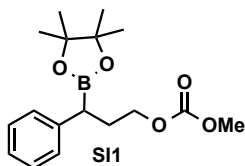

Following the general procedure A, **S11** was obtained in 72% yield.

$^1\text{H}$  NMR (600 MHz, Chloroform-*d*)  $\delta$  7.29-7.23 (m, 2H), 7.23-7.17 (m, 2H), 7.15 (t,  $J = 7.5$  Hz, 1H), 4.14 (dt,  $J = 10.6, 6.3$  Hz, 1H), 4.05 (dt,  $J = 10.7, 6.9$  Hz, 1H), 3.77 (s, 3H), 2.44 (t,  $J = 7.9$  Hz, 1H), 2.24 (dq,  $J = 14.4, 7.2$  Hz, 1H), 2.02 (tt,  $J = 14.1, 6.4$  Hz, 1H), 1.20 (d,  $J = 13.5$  Hz, 12H).  $^{13}\text{C}$  NMR (151 MHz,  $\text{CDCl}_3$ ) 156.02, 142.05, 128.69, 128.56, 125.76, 83.74, 67.62, 54.80, 31.43, 24.77. HRMS (ESI)  $m/z$   $[\text{M}+\text{K}]^+$  calcd for  $\text{C}_{17}\text{H}_{25}\text{BKO}_5$  359.1427, found 359.1429.

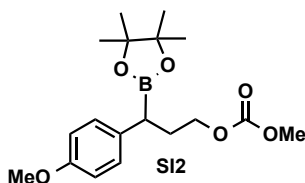

Following the general procedure A, **S12** was obtained in 90% yield.

$^1\text{H}$  NMR (500 MHz, Chloroform-*d*)  $\delta$  7.17 – 7.05 (m, 2H), 6.87 – 6.75 (m, 2H), 4.13 (ddd,  $J = 10.6, 6.8, 5.8$  Hz, 1H), 4.04 (dt,  $J = 10.6, 7.0$  Hz, 1H), 3.78 (s, 3H), 3.76 (s, 3H), 2.38 (t,  $J = 7.9$  Hz, 1H), 2.19 (dq,  $J = 14.3, 7.2$  Hz, 1H), 1.96 (ddt,  $J = 14.2, 8.5, 6.2$  Hz, 1H), 1.20 (d,  $J = 10.7$  Hz, 12H).  $^{13}\text{C}$  NMR (126 MHz,  $\text{CDCl}_3$ )  $\delta$  157.75, 156.02, 133.91, 129.46, 114.13, 83.68, 67.58, 55.39, 54.82, 31.63, 24.82, 24.78. HRMS (ESI)  $m/z$   $[\text{M}+\text{Na}]^+$  calcd for  $\text{C}_{18}\text{H}_{27}\text{BNaO}_6$  373.1793, found 373.1797.

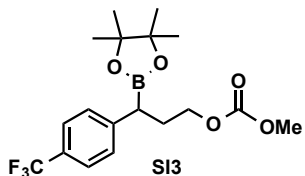

Following the general procedure A, **S13** was obtained in 71% yield.

$^1\text{H}$  NMR (600 MHz, Chloroform-*d*)  $\delta$  7.51 (d,  $J = 8.0$  Hz, 2H), 7.31 (d,  $J = 7.9$  Hz, 2H), 4.14 (dt,  $J = 10.8, 6.2$  Hz, 1H), 4.03 (ddd,  $J = 10.7, 7.3, 6.2$  Hz, 1H), 3.76 (s, 3H), 2.52 (t,  $J = 7.9$  Hz, 1H), 2.25 (dq,  $J = 14.2, 7.2$  Hz, 1H), 2.02 (ddd,  $J = 14.0, 8.1, 6.0$  Hz, 1H), 1.20 (d,  $J = 10.5$  Hz, 12H).  $^{13}\text{C}$  NMR (151 MHz,  $\text{CDCl}_3$ )  $\delta$  155.96, 146.52, 128.80, 128.24, 128.03, 125.61 (q,  $J = 7.5$  Hz), 123.71, 84.05, 67.29, 54.87, 31.18, 24.83, 24.79. HRMS (EI)  $m/z$   $[\text{M}]^+$  calcd for  $\text{C}_{18}\text{H}_{24}\text{BF}_3\text{O}_5$  388.1669, found 388.1665.

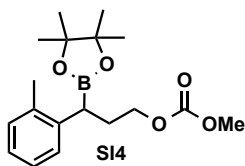

Following the general procedure A, **SI4** was obtained in 89% yield.

$^1\text{H}$  NMR (500 MHz, Chloroform-*d*)  $\delta$  7.20 (dd,  $J = 8.0, 1.5$  Hz, 1H), 7.15 (tt,  $J = 5.5, 1.5$  Hz, 2H), 7.08 (td,  $J = 7.2, 1.5$  Hz, 1H), 4.18 (dt,  $J = 10.7, 6.3$  Hz, 1H), 4.07 (dt,  $J = 10.5, 6.9$  Hz, 1H), 3.79 (s, 3H), 2.66 (t,  $J = 7.8$  Hz, 1H), 2.35 (s, 3H), 2.27 (dq,  $J = 14.3, 7.2$  Hz, 1H), 2.02 (ddt,  $J = 14.0, 7.9, 6.2$  Hz, 1H), 1.22 (d,  $J = 12.1$  Hz, 12H).  $^{13}\text{C}$  NMR (126 MHz,  $\text{CDCl}_3$ )  $\delta$  156.03, 140.49, 136.31, 130.54, 127.95, 126.27, 125.60, 83.65, 67.75, 54.82, 31.01, 24.88, 24.77, 20.29. HRMS (ESI)  $m/z$   $[\text{M}+\text{K}]^+$  calcd for  $\text{C}_{18}\text{H}_{27}\text{BKO}_5$  373.1583, 373.1584.

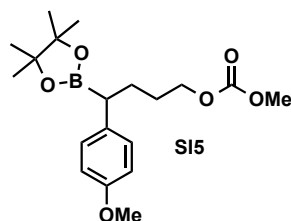

Following the general procedure A, **SI5** was obtained in 74% yield.

$^1\text{H}$  NMR (500 MHz, Chloroform-*d*)  $\delta$  7.17 – 7.02 (m, 2H), 6.88 – 6.73 (m, 2H), 4.12 (td,  $J = 6.6, 1.8$  Hz, 2H), 3.80 (s, 3H), 3.78 (s, 3H), 2.26 (t,  $J = 7.7$  Hz, 1H), 1.96 – 1.83 (m, 1H), 1.76 – 1.57 (m, 3H), 1.22 (d,  $J = 11.4$  Hz, 12H).  $^{13}\text{C}$  NMR (126 MHz,  $\text{CDCl}_3$ )  $\delta$  157.61, 156.01, 134.72, 129.43, 114.01, 83.54, 68.43, 55.37, 54.82, 28.95, 28.33, 24.84, 24.79. HRMS (ESI)  $m/z$   $[\text{M}+\text{Na}]^+$  calcd for  $\text{C}_{19}\text{H}_{29}\text{BNaO}_6$  387.1949, found 387.1951.

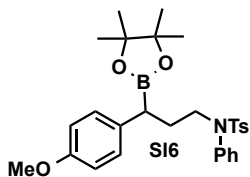

Following the general procedure A, utilizing deoxygenated THF, **SI6** was obtained in 84% yield.

$^1\text{H}$  NMR (600 MHz, Chloroform-*d*)  $\delta$  7.46 – 7.38 (m, 2H), 7.27 (dt,  $J = 4.5, 3.1$  Hz, 3H), 7.20 (d,  $J = 8.1$  Hz, 2H), 7.06 – 6.93 (m, 4H), 6.81 – 6.67 (m, 2H), 3.75 (s, 3H), 3.48 (t,  $J = 7.2$  Hz, 2H), 2.40 (s, 3H), 2.32 (t,  $J = 7.9$  Hz, 1H), 1.94 (dq,  $J = 14.4, 7.2$  Hz, 1H), 1.71 (dq,  $J = 13.6, 7.6$  Hz, 1H), 1.17 (d,  $J = 18.5$  Hz, 12H).  $^{13}\text{C}$  NMR (151 MHz,  $\text{CDCl}_3$ )  $\delta$  157.61, 143.32, 139.51, 135.50, 134.18, 129.46, 129.38, 129.05, 128.95, 127.90, 127.84, 113.99, 83.61, 55.36, 50.11, 31.41, 24.85, 24.73, 21.73. HRMS (EI)  $m/z$   $[\text{M}]^+$  calcd for  $\text{C}_{29}\text{H}_{36}\text{BNO}_5\text{S}$  521.2407, found 521.2399.

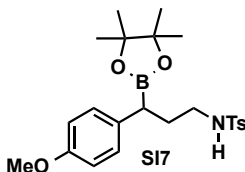

Following the general procedure A, utilizing deoxygenated THF, **SI7** was obtained in 91% yield.

$^1\text{H}$  NMR (500 MHz, Chloroform-*d*)  $\delta$  7.72 (d,  $J = 7.6$  Hz, 2H), 7.32 (d,  $J = 9.8$  Hz, 2H), 7.01 (d,  $J = 7.9$  Hz, 2H), 6.78 (d,  $J = 8.7$  Hz, 2H), 4.63 (t,  $J = 6.2$  Hz, 1H), 3.79 (d,  $J = 2.5$  Hz, 3H), 2.99 – 2.76 (m, 2H), 2.44 (d,  $J = 2.5$  Hz, 3H), 2.26 (t,  $J = 7.7$  Hz, 1H), 1.95 (dq,  $J = 14.6, 7.4$  Hz, 1H), 1.79 (dq,  $J = 14.1, 7.0$  Hz, 1H), 1.20 (dd,  $J = 12.8, 2.6$  Hz, 12H).  $^{13}\text{C}$  NMR (126 MHz,  $\text{CDCl}_3$ )  $\delta$  157.75, 143.40, 137.05, 133.81, 129.81, 129.41, 127.34, 114.14, 83.85, 83.34, 55.37, 42.73, 32.43, 24.81, 24.76, 21.71. HRMS (ESI)  $m/z$   $[\text{M}+\text{Na}]^+$  calcd for  $\text{C}_{23}\text{H}_{32}\text{BNNaO}_5\text{S}$  468.1986, found 468.1985.

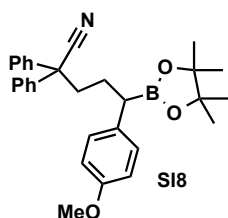

Following the general procedure A, **S18** was obtained in 99% yield.

$^1\text{H}$  NMR (500 MHz, Chloroform-*d*)  $\delta$  7.41 – 7.23 (m, 10H), 7.10 (d,  $J$  = 8.6 Hz, 2H), 6.84 (d,  $J$  = 8.9 Hz, 2H), 3.81 (s, 3H), 2.41 – 2.30 (m, 2H), 2.28 (dd,  $J$  = 8.8, 6.7 Hz, 1H), 2.02 (ddd,  $J$  = 16.8, 13.7, 7.3 Hz, 1H), 1.87 – 1.73 (m, 1H), 1.21 (d,  $J$  = 10.4 Hz, 12H).  $^{13}\text{C}$  NMR (126 MHz,  $\text{CDCl}_3$ )  $\delta$  157.67, 140.72, 140.06, 134.10, 129.47, 128.97, 128.96, 127.88, 127.05, 127.01, 122.63, 114.01, 83.60, 55.37, 51.85, 39.13, 28.43, 24.86, 24.76. HRMS (ESI)  $m/z$   $[\text{M}+\text{Na}]^+$  calcd for  $\text{C}_{30}\text{H}_{34}\text{BNNaO}_3$  490.2524, found 490.2524.

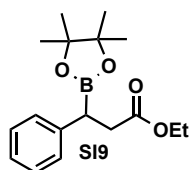

Following the general procedure A, **S19** was obtained in 46% yield.

$^1\text{H}$  NMR (600 MHz, Chloroform-*d*)  $\delta$  7.33 – 7.23 (m, 4H), 7.22 – 7.16 (m, 1H), 4.24 – 4.06 (m, 2H), 2.92 (dd,  $J$  = 16.4, 10.2 Hz, 1H), 2.78 (dd,  $J$  = 10.2, 6.1 Hz, 1H), 2.70 (dd,  $J$  = 16.4, 6.1 Hz, 1H), 1.29 – 1.19 (m, 15H).  $^{13}\text{C}$  NMR (151 MHz,  $\text{CDCl}_3$ )  $\delta$  173.60, 141.60, 128.65, 128.40, 125.84, 83.74, 60.54, 37.53, 24.79, 24.70, 14.45. HRMS (ESI)  $m/z$   $[\text{M}+\text{Na}]^+$  calcd for  $\text{C}_{17}\text{H}_{25}\text{BNaO}_4$  343.1477, found 343.1479.

### General procedure B: Enantioselective three-component 1,1-arylborylation reaction for the synthesis of substrates (S1, S10-S22)

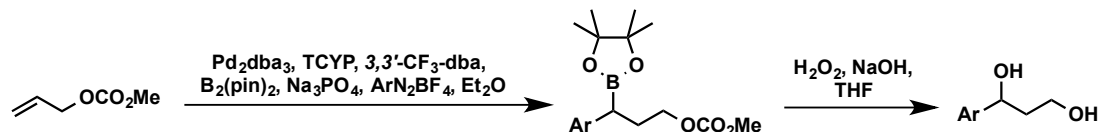

A 1 dram vial was charged with  $\text{B}_2(\text{pin})_2$  (2.4 equiv.),  $\text{Pd}_2\text{dba}_3$  (5 mol%), TCYP (10 mol%), *m*- $\text{CF}_3$ -dba (16 mol%),  $\text{Na}_3\text{PO}_4$  (2.4 equiv.), the  $\text{ArN}_2\text{BF}_4$  (2 equiv). To the solid reagents was added a solution of allyl methyl carbonate (1 equiv.) in  $\text{Et}_2\text{O}$  (0.043 M in allyl methyl carbonate). The headspace of the reaction vessel was sparged with  $\text{N}_2$  for ca. 10 seconds then the vial was capped and the heterogeneous reaction mixture was stirred vigorously. The reaction progress was monitored *via* TLC analysis. Upon completion the reaction was filtered through a plug of cotton to remove solid particulates and then concentrated *in vacuo*.

**$^1\text{H}$  NMR yield:** The crude reaction mixture was dissolved in a solution of  $\text{CD}_2\text{Cl}_2$  and dimethyl sulfone (1 equiv.) to obtain the NMR yield.

**Isolated yield of diol (over two steps):** The crude reaction mixture was concentrated and purified *via* column chromatography (EtOAc/Hexanes) to obtain the boronic ester product contaminated with residual  $\text{B}_2\text{pin}_2$ . To this mixture was added THF (1.0 mL), 1 M NaOH (0.50 mL), and 30 % aq.  $\text{H}_2\text{O}_2$  (0.25 mL) and then reaction mixture was stirred under a  $\text{N}_2$  atmosphere. Reaction progress was monitored *via* TLC analysis. Upon complete conversion to the diol, the reaction was quenched with sat. aq.  $\text{Na}_2\text{S}_2\text{O}_3$  (5 mL) and extracted with EtOAc (3 X 10 mL). The organic layers were combined, dried with  $\text{Na}_2\text{SO}_4$ , concentrated, and then purified *via* column chromatography (40-60% EtOAc/Hexanes) to provide pure diol.

The amounts of THF, 1M NaOH and hydrogen peroxide are representative of those used in a reaction with 0.043 mmol allyl methyl carbonate.

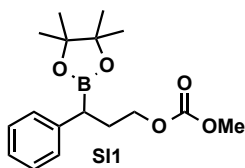

Following the general procedure B, **SI1** was provided in 36% yield (via  $^1\text{H}$  NMR analysis).

$^1\text{H}$  NMR (600 MHz, Chloroform-*d*)  $\delta$  7.29-7.23 (m, 2H), 7.23-7.17 (m, 2H), 7.15 (t,  $J = 7.5$  Hz, 1H), 4.14 (dt,  $J = 10.6, 6.3$  Hz, 1H), 4.05 (dt,  $J = 10.7, 6.9$  Hz, 1H), 3.77 (s, 3H), 2.44 (t,  $J = 7.9$  Hz, 1H), 2.24 (dq,  $J = 14.4, 7.2$  Hz, 1H), 2.02 (tt,  $J = 14.1, 6.4$  Hz, 1H), 1.20 (d,  $J = 13.5$  Hz, 12H).  $^{13}\text{C}$  NMR (151 MHz,  $\text{CDCl}_3$ ) 156.02, 142.05, 128.69, 128.56, 125.76, 83.74, 67.62, 54.80, 31.43, 24.77. HRMS (ESI)  $m/z$   $[\text{M}+\text{K}]^+$  calcd for  $\text{C}_{17}\text{H}_{25}\text{BKO}_5$  359.1427, found 359.1429. 92% ee

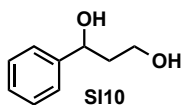

Following the general procedure B, **SI10** was isolated in 23% yield over two steps.  $^1\text{H}$  NMR (600 MHz, Chloroform-*d*)  $\delta$  7.38 (d,  $J = 6.5$  Hz, 3H), 7.33 – 7.22 (m, 2H), 4.98 (dd,  $J = 9.0, 3.6$  Hz, 1H), 3.88 (t,  $J = 5.5$  Hz, 2H), 2.80 (s, 1H), 2.35 (s, 1H), 2.10 – 1.98 (m, 1H), 1.96 (dq,  $J = 14.2, 4.6$  Hz, 1H).  $^{13}\text{C}$  NMR (151 MHz,  $\text{CDCl}_3$ )  $\delta$  144.52, 128.76, 127.84, 125.86, 74.63, 61.73, 40.75. Spectra matches previously reported spectra: Borowiecki, P.; Wawro, A. M.; Winska, P.; Wielechowska, M.; Bretner, M. *Eur. J. Med. Chem.* **2014**, *84*, 364. HPLC (ChiralPak IC column) 90:10 (hexane/*i*PrOH) 1mL/min;  $T_{\text{major}}$  (15.4 min),  $T_{\text{minor}}$  (11.8 min); 92% ee

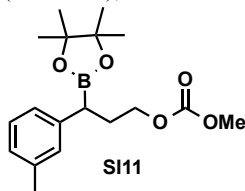

Following the general procedure B, **SI11** was provided in 50% yield (via  $^1\text{H}$  NMR analysis).

$^1\text{H}$  NMR (500 MHz, Chloroform-*d*)  $\delta$  7.15 (t,  $J = 7.5$  Hz, 1H), 7.03 – 6.94 (m, 3H), 4.14 (ddd,  $J = 10.6, 6.8, 5.8$  Hz, 1H), 4.05 (dt,  $J = 10.6, 6.9$  Hz, 1H), 3.77 (s, 3H), 2.39 (t,  $J = 7.9$  Hz, 1H), 2.31 (s, 3H), 2.22 (dq,  $J = 14.4, 7.3$  Hz, 1H), 1.99 (ddt,  $J = 14.1, 8.2, 6.2$  Hz, 1H), 1.20 (d,  $J = 11.0$  Hz, 12H).  $^{13}\text{C}$  NMR (126 MHz,  $\text{CDCl}_3$ )  $\delta$  156.02, 141.90, 138.16, 129.43, 128.55, 126.55, 125.50, 83.70, 67.69, 54.81, 31.49, 24.79, 21.66. HRMS (ESI)  $m/z$   $[\text{M}+\text{K}]^+$  calcd for  $\text{C}_{18}\text{H}_{27}\text{BKO}_5$  373.1583, found 373.1582.

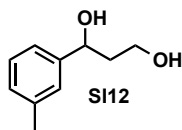

Following the general procedure B, **SI12** was isolated in 30% yield over two steps.  $^1\text{H}$  NMR (500 MHz, Chloroform-*d*) 7.27 (d,  $J = 7.6$  Hz, 1H), 7.23 (s, 1H), 7.19 (d,  $J = 7.7$  Hz, 1H), 7.13 (d,  $J = 7.5$  Hz, 1H), 4.97 (dd,  $J = 8.9, 3.6$  Hz, 1H), 3.90 (dd,  $J = 6.5, 4.6$  Hz, 2H), 2.77 (s, 1H), 2.39 (s, 4H), 2.11-2.01 (m, 1H), 1.96 (dtd,  $J = 14.6, 5.2, 3.9$  Hz, 1H).  $^{13}\text{C}$  NMR (126 MHz,  $\text{CDCl}_3$ ) 144.44, 138.44, 128.65, 128.58, 126.54, 122.89, 74.75, 61.82, 40.65, 21.69. Spectra matches previously reported spectra: Boyer, S. H.; Sun, Z.; Jiang, H.; Esterbrook, J.; Gómez-Galeno, J. E.; Craigo, W.; Reddy, K. R.; Ugarkar, B. G.; MacKenna, D. A.; Erion, M. D. *J. Med. Chem.* **2006**, *49*, 7711. HPLC (ChiralPak IC column) 90:10 (hexane/*i*PrOH) 1mL/min;  $T_{\text{major}}$  (18.2 min),  $T_{\text{minor}}$  (12.3 min); 88% ee

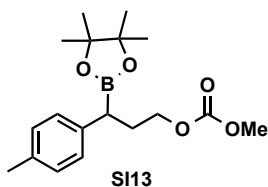

Following the general procedure B, **SI13** was provided in 46% yield (via  $^1\text{H}$  NMR analysis).

$^1\text{H}$  NMR (500 MHz, Chloroform-*d*)  $\delta$  7.16 – 7.02 (m, 4H), 4.15 (ddd,  $J$  = 10.6, 6.8, 5.8 Hz, 1H), 4.06 (dt,  $J$  = 10.7, 7.0 Hz, 1H), 3.78 (s, 3H), 2.42 (t,  $J$  = 7.9 Hz, 1H), 2.32 (s, 3H), 2.23 (dq,  $J$  = 14.3, 7.2 Hz, 1H), 2.00 (ddt,  $J$  = 14.2, 8.4, 6.2 Hz, 1H), 1.22 (d,  $J$  = 10.6 Hz, 12H).  $^{13}\text{C}$  NMR (126 MHz,  $\text{CDCl}_3$ )  $\delta$  156.02, 138.83, 135.13, 129.41, 128.44, 83.67, 67.62, 54.80, 31.56, 24.82, 24.79, 21.20. HRMS (ESI)  $m/z$   $[\text{M}+\text{Na}]^+$  calcd for  $\text{C}_{18}\text{H}_{27}\text{BNaO}_5$  357.1844, found 357.1844.

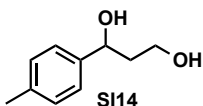

Following the general procedure B, **SI14** was isolated in 35% yield over two steps.  $^1\text{H}$  NMR (500 MHz, Chloroform-*d*) = 7.29 (d,  $J$  = 8.0 Hz, 2H), 7.20 (d,  $J$  = 7.9 Hz, 2H), 4.97 (dd,  $J$  = 9.0, 3.6 Hz, 1H), 3.89 (t,  $J$  = 5.5 Hz, 2H), 2.72 (s, 1H), 2.38 (s, 4H), 2.11-2.00 (m, 1H), 2.00-1.90 (m, 1H).  $^{13}\text{C}$  NMR (126 MHz,  $\text{CDCl}_3$ ) = 141.52, 137.55, 129.41, 125.80, 74.59, 61.80, 40.65, 21.33. Spectra matches previously reported spectra: Kim, J.; De Castro, K. A.; Lim, M.; Rhee, H. *Tetrahedron*, **2010**, *66*, 3995. HPLC (ChiralPak IC column) 90:10 (hexane/*i*PrOH) 1mL/min;  $T_{\text{major}}$  (18.9 min),  $T_{\text{minor}}$  (14.2 min); 90% ee

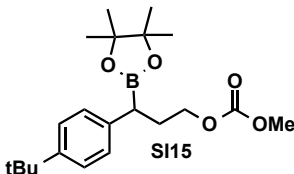

Following the general procedure B, **SI15** was provided in 32% yield (via  $^1\text{H}$  NMR analysis).

$^1\text{H}$  NMR (600 MHz, Chloroform-*d*) 7.26 (d,  $J$  = 8.3 Hz, 2H), 7.11 (d,  $J$  = 8.7 Hz, 2H), 4.14 (dt,  $J$  = 10.6, 6.3 Hz, 1H), 4.05 (dt,  $J$  = 10.6, 6.9 Hz, 1H), 3.76 (s, 3H), 2.41 (t,  $J$  = 7.9 Hz, 1H), 2.25-2.14 (m, 1H), 1.99 (dq,  $J$  = 13.9, 6.3 Hz, 1H), 1.28 (s, 9H), 1.21 (d,  $J$  = 12.4 Hz, 12H).  $^{13}\text{C}$  NMR (151 MHz,  $\text{CDCl}_3$ ) 156.06, 148.38, 138.77, 128.20, 125.58, 83.69, 67.73, 54.79, 34.51, 31.66, 31.62, 24.84. HRMS (ESI)  $m/z$   $[\text{M}+\text{K}]^+$  calcd for  $\text{C}_{21}\text{H}_{33}\text{BKO}_5$  415.2053, found 415.2051.

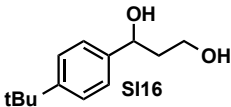

Following the general procedure B, **SI16** was isolated in 32% yield over two steps.  $^1\text{H}$  NMR (500 MHz, Chloroform-*d*) 7.42 (d,  $J$  = 8.0 Hz, 2H), 7.34 (d,  $J$  = 8.2 Hz, 2H), 4.99 (dd,  $J$  = 9.1, 3.6 Hz, 1H), 3.91 (s, 2H), 2.59 (s, 1H), 2.36 (s, 1H), 2.11-2.05 (m, 1H), 2.01-1.92 (m, 1H), 1.35 (s, 10H), 1.29 (t,  $J$  = 7.2 Hz, 1H).  $^{13}\text{C}$  NMR (126 MHz,  $\text{CDCl}_3$ ) 150.87, 141.47, 125.68, 125.61, 74.58, 61.87, 40.56, 34.75, 31.57. Spectra matches previously reported spectra: Reddy, K. R.; Matelich, M. C.; Ugarkar, B. G.; Gómez-Galeno, J. E.; DaRe, J.; Ollis, K.; Sun, Z.; Craigo, W.; Colby, T. J.; Fujitaki, J. M.; Boyer, S. H.; van Poelje, P. D.; Erion, M. D. *J. Med. Chem.* **2008**, *51*, 666. HPLC (ChiralPak IC column) 90:10 (hexane/*i*PrOH) 1mL/min;  $T_{\text{major}}$  (14.9 min),  $T_{\text{minor}}$  (11.4 min); 96% ee

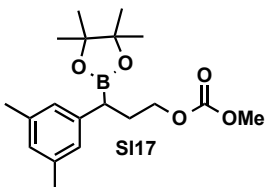

Following the general procedure B, **SI17** was provided in a 60% yield (via  $^1\text{H}$  NMR analysis).

$^1\text{H}$  NMR (500 MHz, Chloroform-*d*) = 6.71 (s, 2H), 6.69 (s, 1H), 4.04 (ddd,  $J = 10.8, 6.9, 5.9$  Hz, 1H), 3.96 (dt,  $J = 10.5, 6.9$  Hz, 1H), 3.67 (s, 3H), 2.25 (t,  $J = 7.9$  Hz, 1H), 2.17 (s, 6H), 2.11 (dq,  $J = 14.5, 7.3$  Hz, 1H), 1.91-1.83 (m, 1H), 1.11 (d,  $J = 10.6$  Hz, 12H).  $^{13}\text{C}$  NMR (126 MHz,  $\text{CDCl}_3$ ) 156.01, 141.80, 137.97, 128.51, 127.48, 126.38, 83.64, 67.74, 54.77, 31.56, 24.74, 21.51. HRMS (ESI)  $m/z$   $[\text{M}+\text{K}]^+$  calcd for  $\text{C}_{19}\text{H}_{29}\text{BKO}_5$  387.1740, found 387.1739.

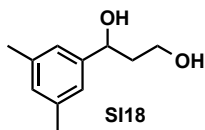

Following the general procedure B, **SI18** was isolated in a 42% yield over two steps.  $^1\text{H}$  NMR (600 MHz, Chloroform-*d*) = 6.99 (s, 2H), 6.94 (s, 1H), 4.91 (dd,  $J = 7.7, 4.5$  Hz, 1H), 3.99-3.80 (m, 2H), 2.61 (s, 1H), 2.33 (s, 6H), 2.10-1.98 (m, 1H), 1.98-1.88 (m, 1H), 1.60 (s, 2H), 1.25 (s, 2H).  $^{13}\text{C}$  NMR (151 MHz,  $\text{CDCl}_3$ ) 144.50, 138.37, 129.48, 123.64, 74.74, 61.82, 40.74, 25.09, 21.55. Spectra matches previously reported spectra: Reddy, K. R.; Matelich, M. C.; Ugarkar, B. G.; Gómez-Galeno, J. E.; DaRe, J.; Ollis, K.; Sun, Z.; Craigo, W.; Colby, T. J.; Fujitaki, J. M.; Boyer, S. H.; van Poelje, P. D.; Erion, M. D. *J. Med. Chem.* **2008**, *51*, 666. HPLC (ChiralPak IC column) 90:10 (hexane/*i*PrOH) 1mL/min;  $T_{\text{major}}$  (18.1 min),  $T_{\text{minor}}$  (11.9 min); 85% ee

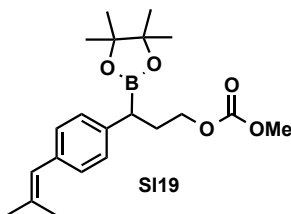

Following the general procedure B, **SI19** was provided in a 40% yield (via  $^1\text{H}$  NMR analysis).

$^1\text{H}$  NMR (500 MHz, Chloroform-*d*)  $\delta$  7.14 (s, 4H), 6.22 (t,  $J = 1.6$  Hz, 1H), 4.14 (dt,  $J = 10.8, 6.3$  Hz, 1H), 4.06 (dt,  $J = 10.6, 6.9$  Hz, 1H), 3.76 (d,  $J = 0.8$  Hz, 3H), 2.42 (t,  $J = 7.9$  Hz, 1H), 2.22 (dq,  $J = 14.4, 7.2$  Hz, 1H), 2.05 – 1.95 (m, 1H), 1.89 (d,  $J = 1.3$  Hz, 3H), 1.87 (d,  $J = 1.2$  Hz, 3H), 1.20 (d,  $J = 10.9$  Hz, 12H).  $^{13}\text{C}$  NMR (126 MHz,  $\text{CDCl}_3$ )  $\delta$  156.02, 139.42, 136.13, 134.99, 129.05, 128.22, 125.13, 83.72, 67.66, 54.81, 31.41, 27.18, 24.82, 24.77, 19.68. HRMS (ESI)  $m/z$   $[\text{M}+\text{Na}]^+$  calcd for  $\text{C}_{21}\text{H}_{31}\text{BNaO}_5$  397.2157, found 397.2160.

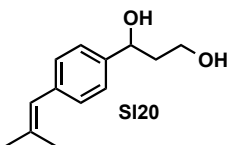

$^1\text{H}$  NMR (500 MHz, Chloroform-*d*)  $\delta$  7.33 (d,  $J = 8.0$  Hz, 2H), 7.23 (d,  $J = 8.1$  Hz, 2H), 6.26 (s, 1H), 5.04 – 4.87 (m, 1H), 3.89 (q,  $J = 5.3, 4.8$  Hz, 2H), 2.65 (d,  $J = 2.7$  Hz, 1H), 2.30 (s, 1H), 2.11 – 2.00 (m, 1H), 2.00 – 1.94 (m, 1H), 1.91 (d,  $J = 1.4$  Hz, 3H), 1.87 (d,  $J = 1.3$  Hz, 3H).  $^{13}\text{C}$  NMR (126 MHz,  $\text{CDCl}_3$ )  $\delta$  141.82, 138.35, 135.97, 129.08, 125.59, 124.87, 74.63, 61.84, 40.59, 27.14, 19.65. HRMS (EI)  $m/z$   $[\text{M}]^+$  calcd for  $\text{C}_{13}\text{H}_{18}\text{O}_2$  206.1307, found 206.1310. HPLC (ChiralPak IC column) 90:10 (hexane/*i*PrOH) 1mL/min;  $T_{\text{major}}$  ( min),  $T_{\text{minor}}$  ( min); 98% ee

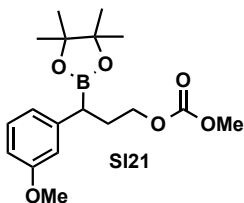

Following the general procedure B, **SI21** was provided in a 58% yield (via  $^1\text{H}$  NMR analysis).

$^1\text{H}$  NMR (600 MHz, Chloroform-*d*) 7.18 (t,  $J = 7.9$  Hz, 1H), 6.79 (dt,  $J = 7.6, 1.2$  Hz, 1H), 6.76 (t,  $J = 2.2$  Hz, 1H), 6.70 (ddd,  $J = 8.2, 2.6, 1.0$  Hz, 1H), 4.21 ? 4.09 (m, 1H), 4.05 (dt,  $J = 10.7, 6.9$  Hz, 1H), 3.79 (s, 3H), 3.76 (s, 3H), 2.42 (t,  $J = 7.9$  Hz, 1H), 2.22 (dq,  $J = 14.3, 7.2$  Hz, 1H), 2.00 (ddt,  $J = 14.2, 8.5, 6.2$  Hz,

1H), 1.20 (d,  $J = 12.5$  Hz, 12H).  $^{13}\text{C}$  NMR (151 MHz,  $\text{CDCl}_3$ ) 159.87, 156.01, 143.66, 129.59, 121.04, 114.18, 111.30, 83.76, 67.60, 55.29, 54.80, 31.42, 24.80. **HRMS**

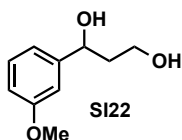

Following the general procedure B, **SI22** was isolated in a 37% yield over two steps.  $^1\text{H}$  NMR (500 MHz, Chloroform- $d$ ) 7.33-7.21 (m, 1H), 7.01-6.91 (m, 2H), 6.87-6.77 (m, 1H), 4.96 (dd,  $J = 8.8, 3.7$  Hz, 1H), 3.88 (dd,  $J = 6.6, 4.4$  Hz, 2H), 3.83 (s, 3H), 2.82 (s, 1H), 2.33 (s, 1H), 2.10-1.99 (m, 1H), 1.99-1.88 (m, 1H).  $^{13}\text{C}$  NMR (126 MHz,  $\text{CDCl}_3$ ) 159.99, 146.23, 129.78, 118.11, 113.24, 111.32, 74.58, 61.76, 55.46, 40.64. Spectra matches previously reported spectra: Borowiecki, P.; Wawro, A. M.; Winska, P.; Wielechowska, M.; Bretner, M. *Eur. J. Med. Chem.* **2014**, *84*, 364. HPLC (ChiralPak IC column) 90:10 (hexane/*i*PrOH) 1mL/min;  $T_{\text{major}}$  (19.6 min),  $T_{\text{minor}}$  (11.1 min); 87% ee

### General procedure C: Enantioselective three-component 1,1-arylborylation reaction for the synthesis of substrates (SI9, SI23-S28)

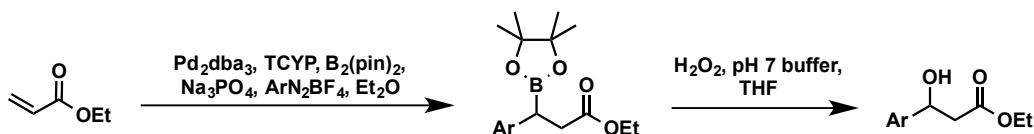

A 1 dram vial was charged with  $\text{B}_2(\text{pin})_2$  (2.2 equiv.),  $\text{Pd}_2\text{dba}_3$  (4 mol%), TCYP (10 mol%),  $\text{Na}_3\text{PO}_4$  (2.4 equiv.), the  $\text{ArN}_2\text{BF}_4$  (1 equiv). To the solid reagents was added a solution of ethyl acrylate (1 equiv.) in  $\text{Et}_2\text{O}$  (0.1 M). The vial was capped and the heterogeneous reaction mixture was stirred vigorously. The reaction progress monitored *via* TLC analysis. Upon completion the reaction was filtered through a plug of Celite, and then concentrated *in vacuo*.

**$^1\text{H}$  NMR yield:** The NMR yield was assessed by dissolving the crude reaction mixture in a solution of  $\text{CD}_2\text{Cl}_2$  with dimethyl sulfone (1 equiv.) as the internal standard.

**Isolated yield of alcohol (over two steps):** The crude reaction mixture (containing dimethyl sulfone) was purified *via* flash column chromatography (EtOAc/Hexanes) to provide the boronic ester product that was contaminated with residual  $\text{B}_2\text{pin}_2$ . The mixture of product and byproduct was treated with THF (1 ml), pH 7 phosphate buffer solution (0.5 mL) was added, followed by the dropwise addition of 30% aq. hydrogen peroxide (0.25 mL). After 0.5 hr, stirring under a  $\text{N}_2$  atmosphere, the reaction mixture was cautiously quenched with sat. aq.  $\text{Na}_2\text{S}_2\text{O}_3$  (2 mL), and then diluted with  $\text{H}_2\text{O}$ . The aqueous layer was extracted with EtOAc (3 x 5 mL). The combined organic layers were dried over anhydrous sodium sulfate, filtered and concentrated *in vacuo*. The crude reaction mixture was purified *via* flash column chromatography (EtOAc/Hexanes) to afford pure hydroxy ethyl esters as yellow oils.

The amounts of THF, pH 7 buffer and hydrogen peroxide are representative of those used in a reaction with 0.09 mmol ethyl acrylate.

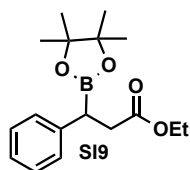

Following the general procedure C, **SI9** was provided in a 47% yield (*via*  $^1\text{H}$  NMR analysis).

$^1\text{H}$  NMR (600 MHz, Chloroform- $d$ )  $\delta$  7.33 – 7.23 (m, 4H), 7.22 – 7.16 (m, 1H), 4.24 – 4.06 (m, 2H), 2.92 (dd,  $J = 16.4, 10.2$  Hz, 1H), 2.78 (dd,  $J = 10.2, 6.1$  Hz, 1H), 2.70 (dd,  $J = 16.4, 6.1$  Hz, 1H), 1.29 – 1.19 (m, 15H).  $^{13}\text{C}$  NMR (151 MHz,  $\text{CDCl}_3$ )  $\delta$  173.60, 141.60, 128.65, 128.40, 125.84, 83.74, 60.54, 37.53, 24.79, 24.70, 14.45. HRMS (ESI)  $m/z$   $[\text{M}+\text{Na}]^+$  calcd for  $\text{C}_{17}\text{H}_{25}\text{BNaO}_4$  343.1477, found 343.1479.



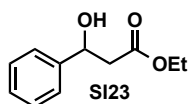

Following the general procedure C, **SI23** was isolated in a 46% yield over two steps.  $^1\text{H}$  NMR (600 MHz, Chloroform-*d*)  $\delta$  7.37 (dd,  $J = 13.5, 6.2$  Hz, 4H), 7.30 (t,  $J = 7.0$  Hz, 1H), 5.15 (dt,  $J = 9.1, 3.3$  Hz, 1H), 4.20 (q,  $J = 7.1$  Hz, 2H), 3.28 (d,  $J = 3.4$  Hz, 1H), 2.83 – 2.64 (m, 2H), 1.28 (t,  $J = 7.2$  Hz, 3H).  $^{13}\text{C}$  NMR (151 MHz,  $\text{CDCl}_3$ )  $\delta$  172.63, 142.72, 128.77, 128.02, 125.89, 70.56, 61.10, 43.55, 14.37. Spectra matches previously reported spectra: Wolf, C.; Moskowitz, M. *J. Org. Chem.* **2011**, *76*, 6372. HPLC (ChiralPak column) (hexane/*i*PrOH) 1mL/min;  $T_{\text{major}}$  (9.0 min),  $T_{\text{minor}}$  (8.2 min); 86% ee

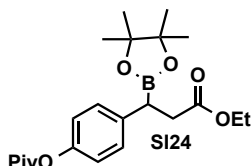

Following the general procedure C, **SI24** was provided in a 40% yield (via  $^1\text{H}$  NMR analysis).  $^1\text{H}$  NMR (500 MHz, Chloroform-*d*) 7.26-7.18 (m, 2H), 7.02-6.87 (m, 2H), 4.11 (qq,  $J = 10.8, 7.1$  Hz, 2H), 2.86 (dd,  $J = 16.3, 10.0$  Hz, 1H), 2.74 (dd,  $J = 10.0, 6.0$  Hz, 1H), 2.65 (dd,  $J = 16.3, 6.0$  Hz, 1H), 1.34 (s, 9H), 1.28-1.22 (m, 3H), 1.20 (app d,  $J = 20.4$  Hz, 12H).  $^{13}\text{C}$  NMR (126 MHz,  $\text{CDCl}_3$ ) 177.41, 173.52, 149.25, 138.84, 129.24, 121.57, 83.82, 60.65, 39.24, 37.57, 27.35, 24.79, 24.71, 14.46. HRMS (ESI)  $m/z$   $[\text{M}+\text{K}]^+$  calcd for  $\text{C}_{22}\text{H}_{33}\text{BKO}_6$  427.2262, found 427.2266.

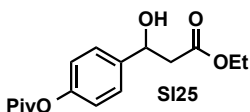

Following the general procedure C, **SI25** was isolated in a 37% yield over two steps.  $^1\text{H}$  NMR (500 MHz, Chloroform-*d*)  $\delta$  7.40 (d,  $J = 8.4$  Hz, 2H), 7.05 (d,  $J = 8.6$  Hz, 2H), 5.15 (dt,  $J = 7.9, 3.4$  Hz, 1H), 4.20 (q,  $J = 7.1$  Hz, 2H), 3.33 (d,  $J = 3.3$  Hz, 1H), 2.81 – 2.63 (m, 2H), 1.36 (s, 9H), 1.28 (t,  $J = 7.1$  Hz, 3H).  $^{13}\text{C}$  NMR (126 MHz,  $\text{CDCl}_3$ )  $\delta$  177.34, 172.61, 150.76, 140.00, 126.92, 121.79, 70.04, 61.18, 43.50, 39.28, 27.34, 14.37. HRMS (ESI)  $m/z$   $[\text{M}+\text{Na}]^+$  calcd for  $\text{C}_{16}\text{H}_{22}\text{NaO}_5$  317.1359, found 317.1357. 92% ee

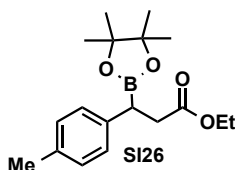

Following the general procedure C, **SI26** was provided in a 44% yield (via  $^1\text{H}$  NMR analysis).  $^1\text{H}$  NMR (600 MHz, Chloroform-*d*) 7.12 (d,  $J = 8.1$  Hz, 2H), 7.07 (d,  $J = 7.9$  Hz, 2H), 4.21-4.01 (m, 2H), 2.86 (dd,  $J = 16.3, 10.1$  Hz, 1H), 2.70 (dd,  $J = 10.1, 6.1$  Hz, 1H), 2.63 (dd,  $J = 16.4, 6.1$  Hz, 1H), 2.30 (s, 3H), 1.24-1.13 (m, 15H).  $^{13}\text{C}$  NMR (151 MHz,  $\text{CDCl}_3$ ) 173.66, 138.47, 135.22, 129.37, 128.29, 83.69, 60.50, 37.73, 24.81, 24.73, 21.18, 14.46. HRMS (ESI)  $m/z$   $[\text{M}+\text{Na}]^+$  calcd for  $\text{C}_{18}\text{H}_{27}\text{BNaO}_4$  341.1895, found 341.1894.

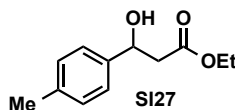

Following the general procedure C, **SI27** was isolated in a 44% yield over two steps.  $^1\text{H}$  NMR (600 MHz, Chloroform-*d*)  $\delta$  7.34 – 7.22 (m, 2H), 7.17 (d,  $J = 7.7$  Hz, 2H), 5.11 (dd,  $J = 9.6, 3.4$  Hz, 1H), 4.19 (qd,  $J = 7.1, 1.1$  Hz, 2H), 3.21 (s, 1H), 2.76 (ddd,  $J = 16.3, 9.4, 1.1$  Hz, 1H), 2.70 (ddd,  $J = 16.3, 3.7, 1.1$  Hz, 1H), 2.35 (s, 3H), 1.28 (td,  $J = 7.2, 1.2$  Hz, 3H).  $^{13}\text{C}$  NMR (151 MHz,  $\text{CDCl}_3$ )  $\delta$  172.63, 139.80, 137.70, 129.41, 125.83, 70.41, 61.04, 43.55, 21.31, 14.37. Spectra matches previously reported spectra: Wolf, C.;

Moskowitz, M. *J. Org. Chem.* **2011**, *76*, 6372. HPLC (ChiralPak column) (hexane/iPrOH) 1mL/min; T<sub>major</sub> (9.0 min), T<sub>minor</sub> (8.2 min); 84% ee

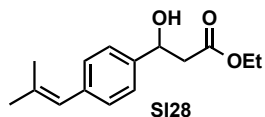

Following the general procedure C, **SI28** was isolated in a 27% yield over two steps. <sup>1</sup>H NMR (500 MHz, Chloroform-*d*) δ 7.33 (d, *J* = 8.2 Hz, 2H), 7.22 (d, *J* = 8.1 Hz, 2H), 6.26 (s, 1H), 5.13 (dt, *J* = 9.3, 3.2 Hz, 1H), 4.20 (q, *J* = 7.1 Hz, 2H), 3.24 (d, *J* = 3.4 Hz, 1H), 2.84 – 2.64 (m, 2H), 1.91 (d, *J* = 1.4 Hz, 3H), 1.86 (d, *J* = 1.4 Hz, 3H), 1.27 (d, *J* = 7.3 Hz, 3H). <sup>13</sup>C NMR (126 MHz, CDCl<sub>3</sub>) δ 172.72, 140.00, 138.50, 136.03, 129.08, 125.62, 124.86, 70.42, 61.10, 43.42, 27.13, 19.63, 14.38. HRMS (ESI) *m/z* [M+Na]<sup>+</sup> calcd for C<sub>15</sub>H<sub>20</sub>NaO<sub>3</sub> 271.1305, found 271.1306. HPLC (ChiralPak column) (hexane/iPrOH) 1mL/min; T<sub>major</sub> (21.0 min), T<sub>minor</sub> (22.3 min); 96% ee

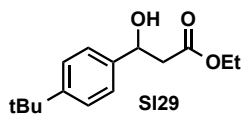

<sup>1</sup>H NMR (500 MHz, Methylene Chloride-*d*<sub>2</sub>) δ 7.42 (d, *J* = 8.3 Hz, 2H), 7.34 (d, *J* = 8.3 Hz, 2H), 5.12 (dt, *J* = 7.3, 3.4 Hz, 1H), 4.20 (q, *J* = 7.1 Hz, 2H), 3.25 – 3.09 (bs, 1H), 2.80 – 2.66 (m, 2H), 1.35 (s, 8H), 1.29 (t, *J* = 7.2 Hz, 3H). <sup>13</sup>C NMR (126 MHz, CD<sub>2</sub>Cl<sub>2</sub>) δ 172.65, 151.05, 140.17, 125.73, 125.68, 70.34, 61.10, 43.59, 34.74, 31.40, 14.30. Spectra matches previously reported spectra: Wolf, C.; Moskowitz, M. *J. Org. Chem.* **2011**, *76*, 6372. HPLC (ChiralPak column) (hexane/iPrOH) 1mL/min; T<sub>major</sub> (21.4 min), T<sub>minor</sub> (23.0 min); 98 % ee

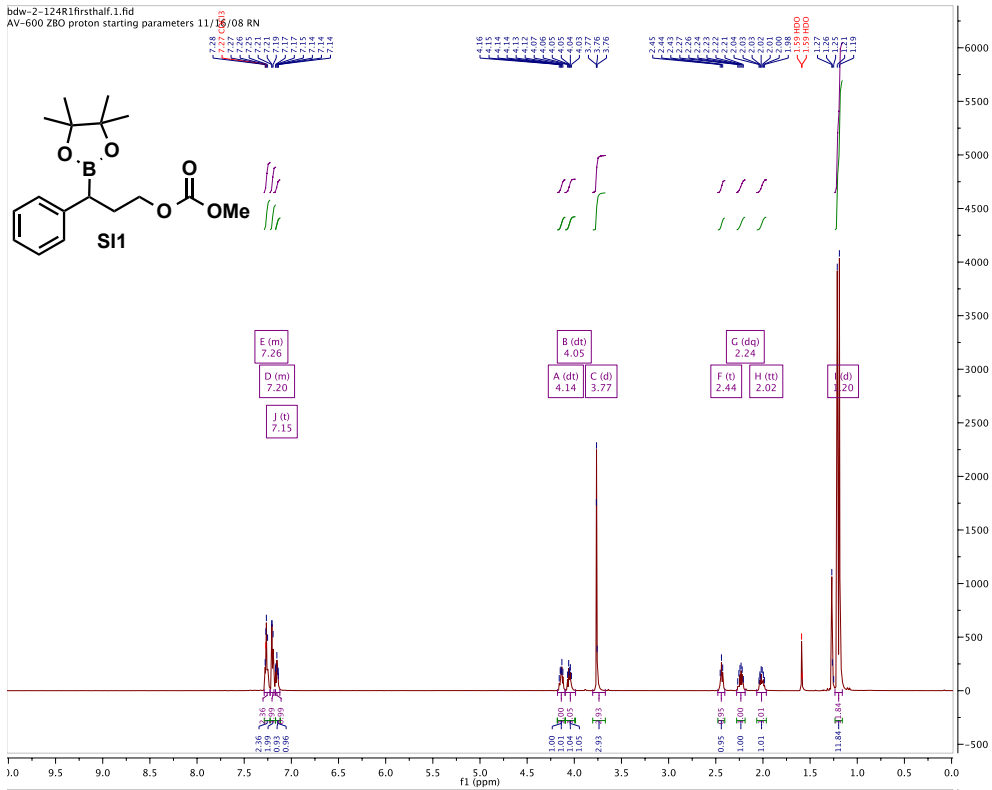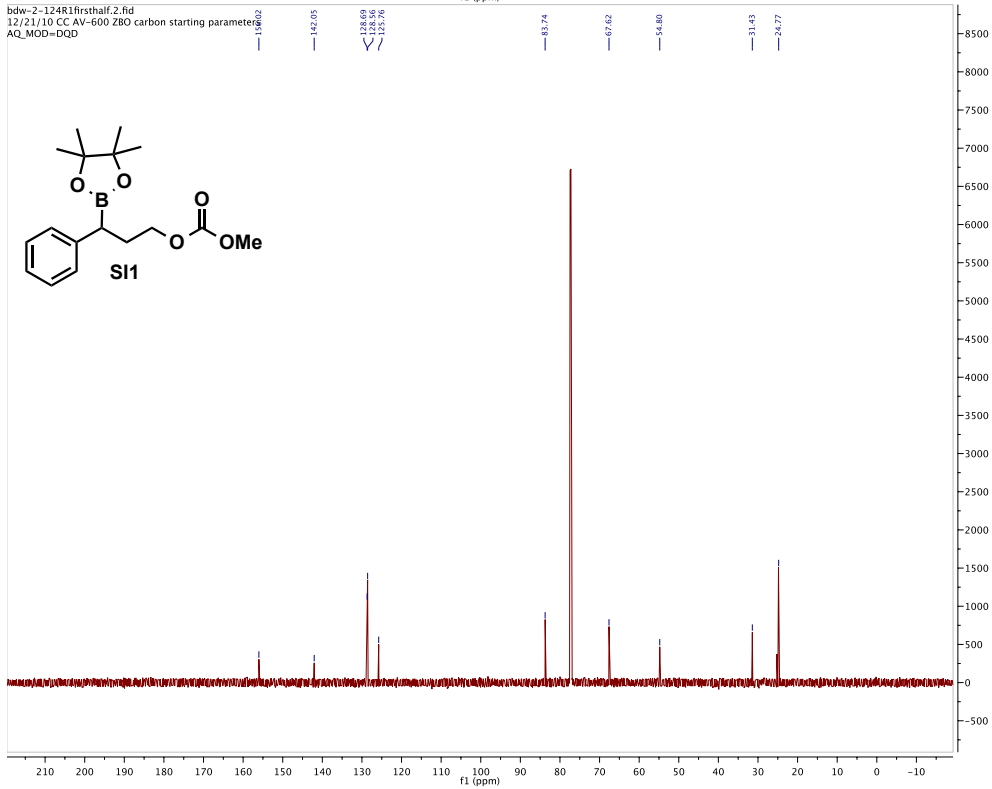

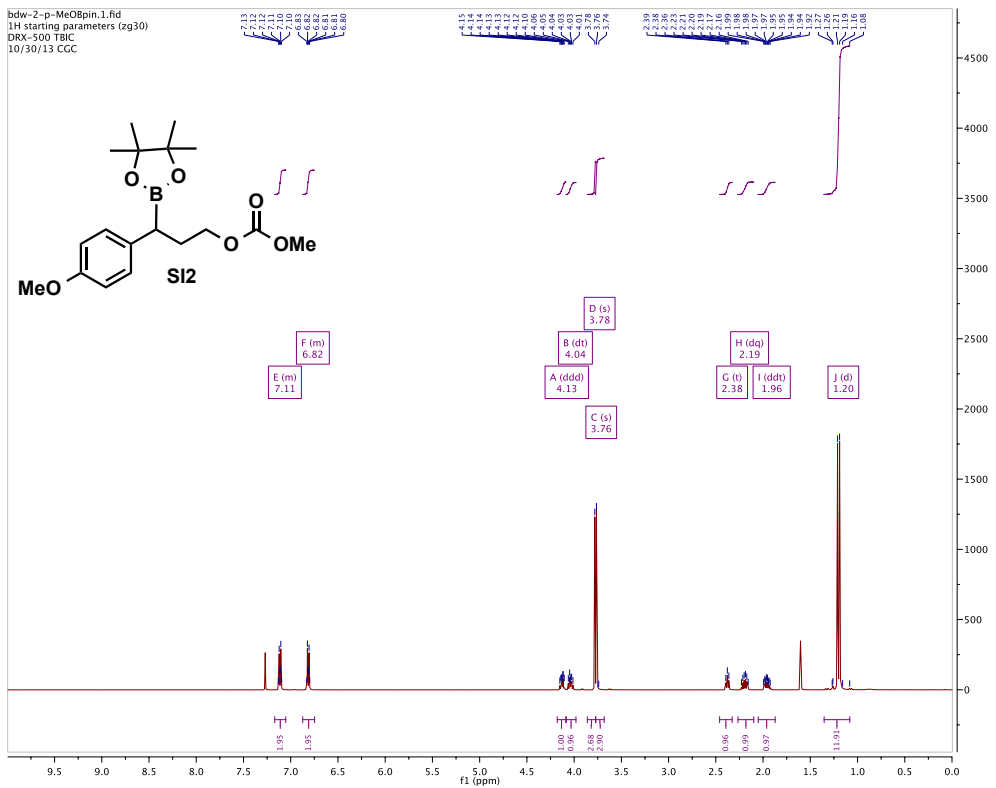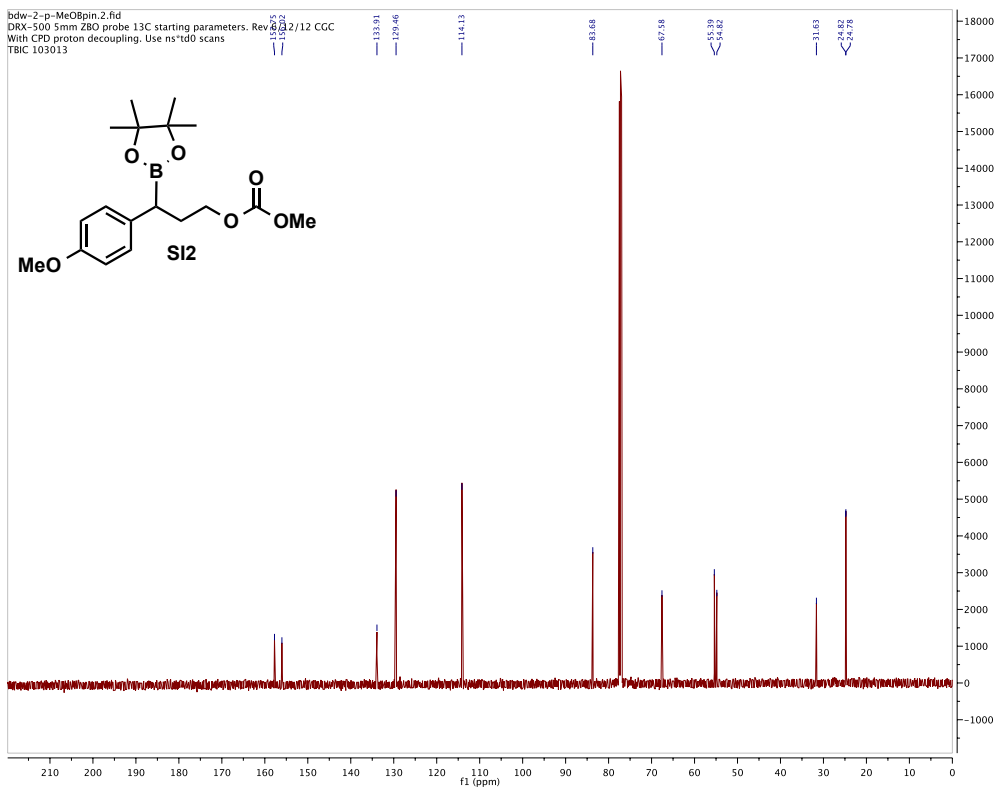

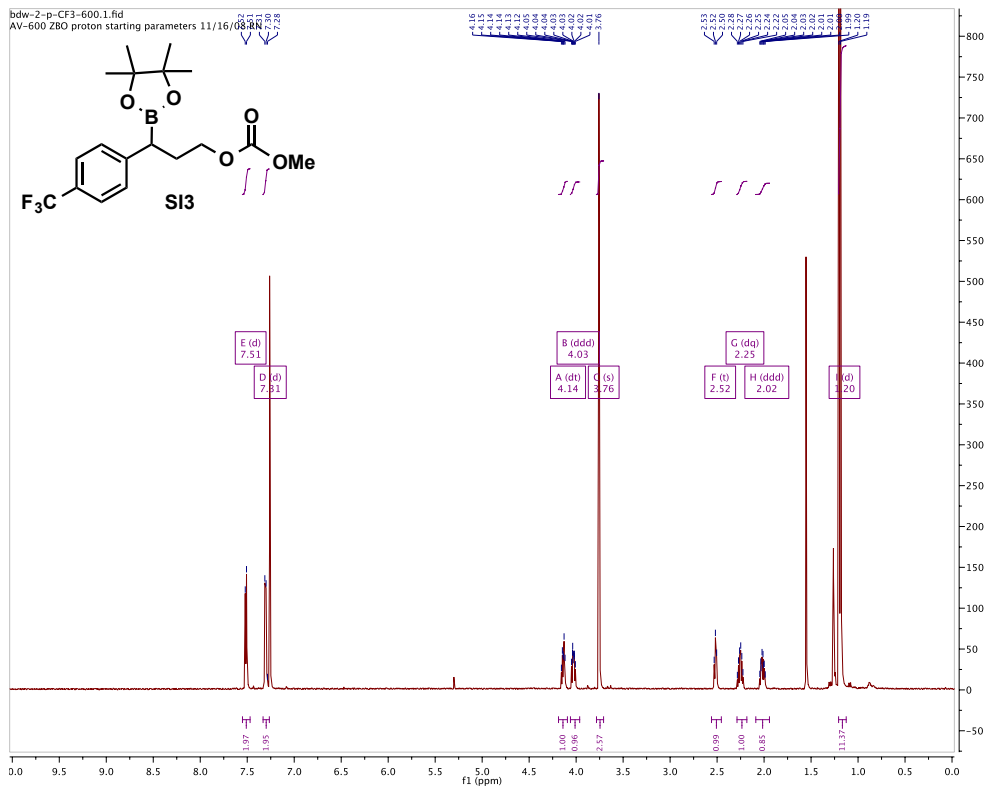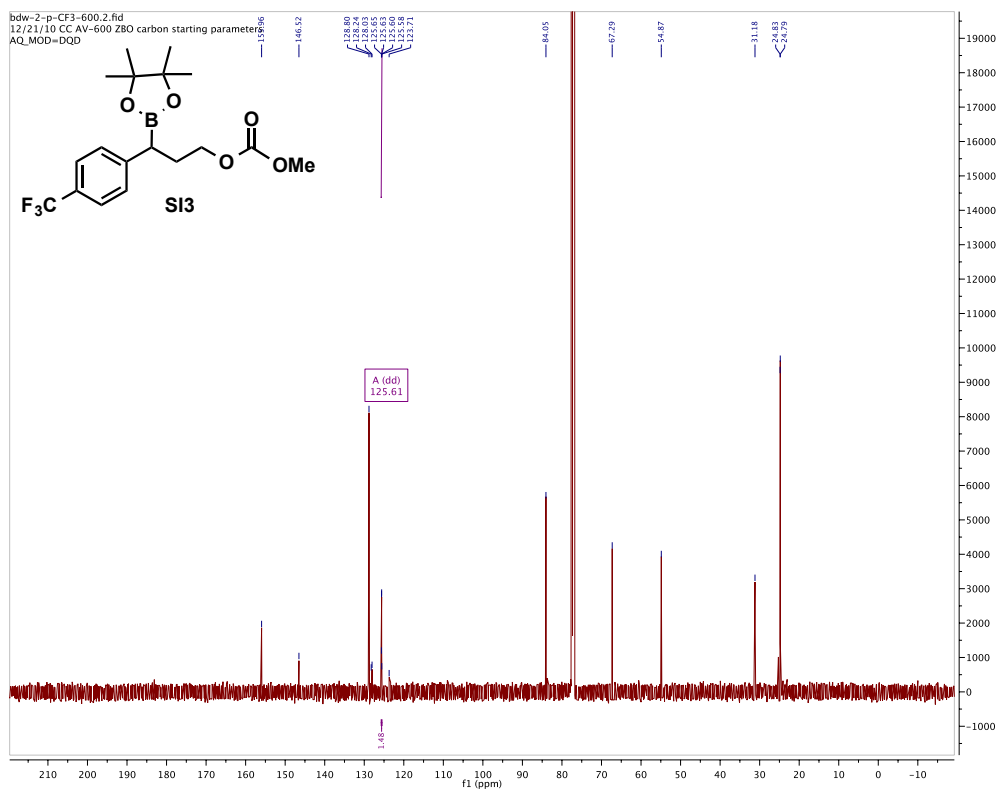

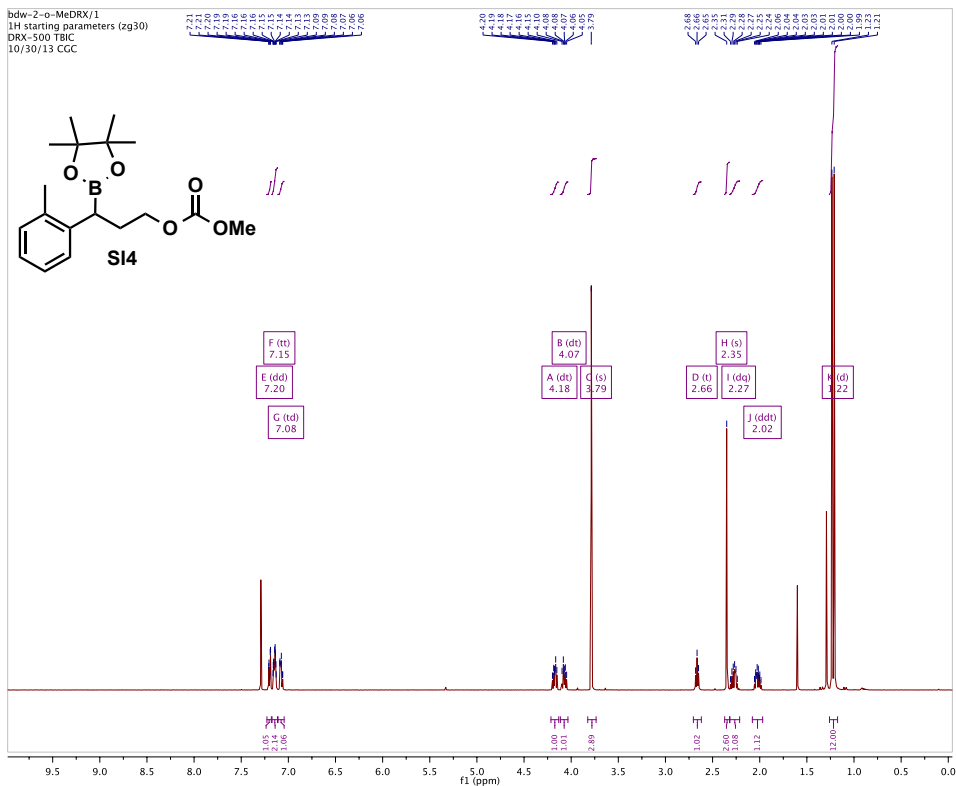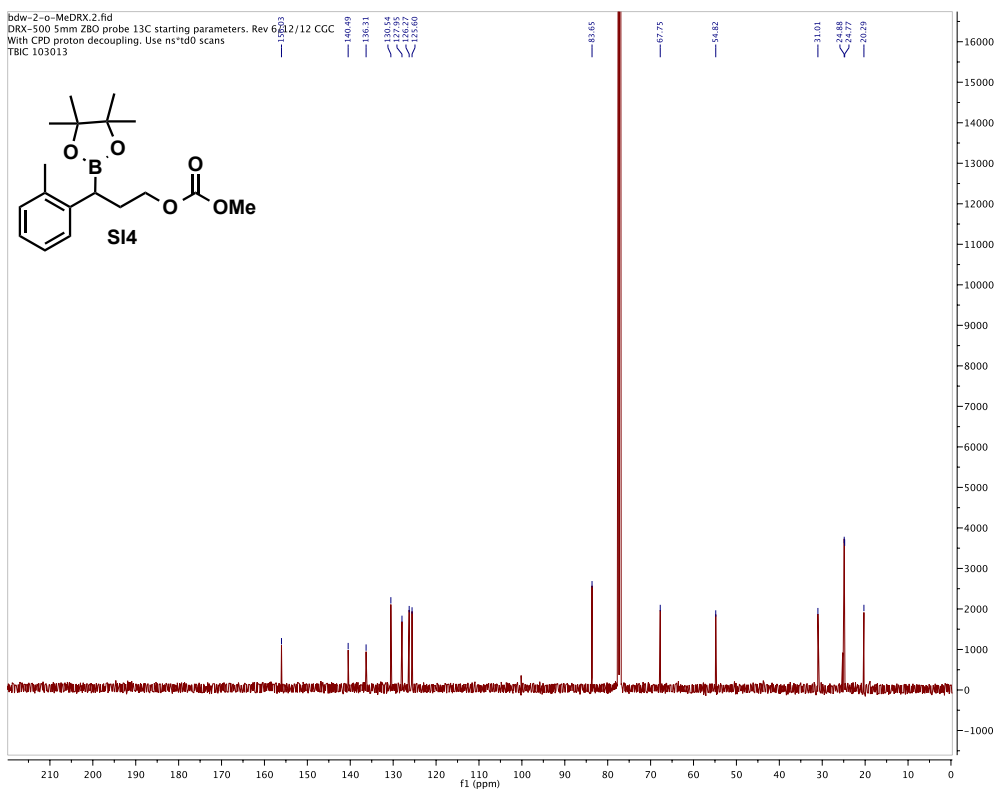

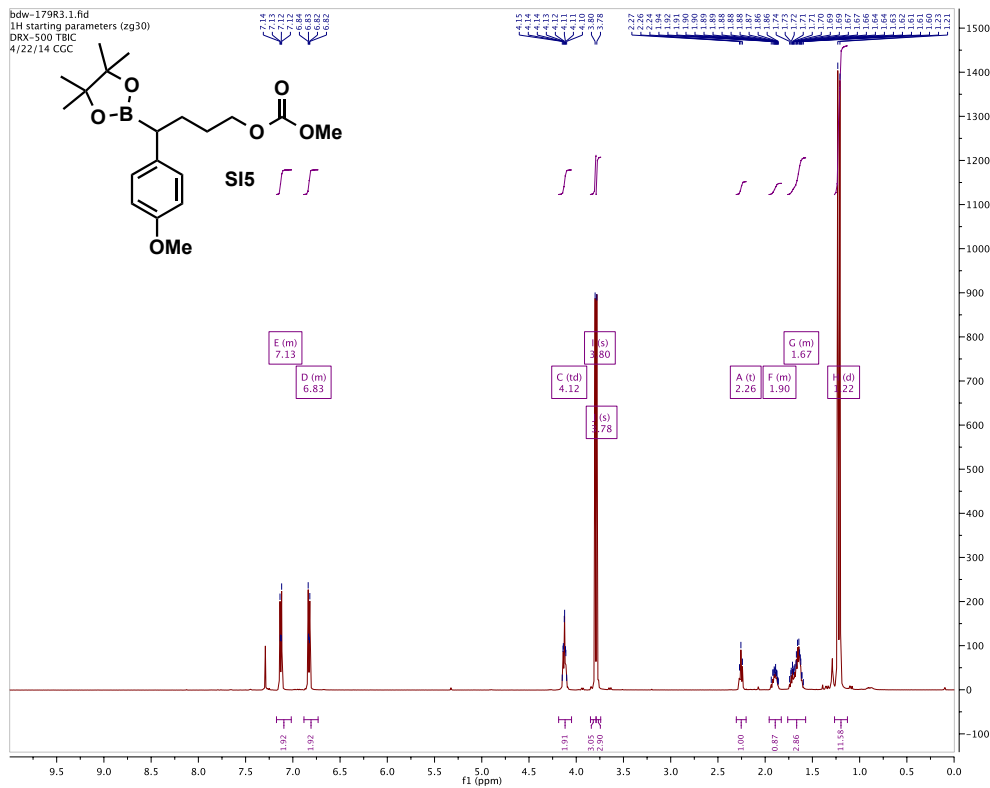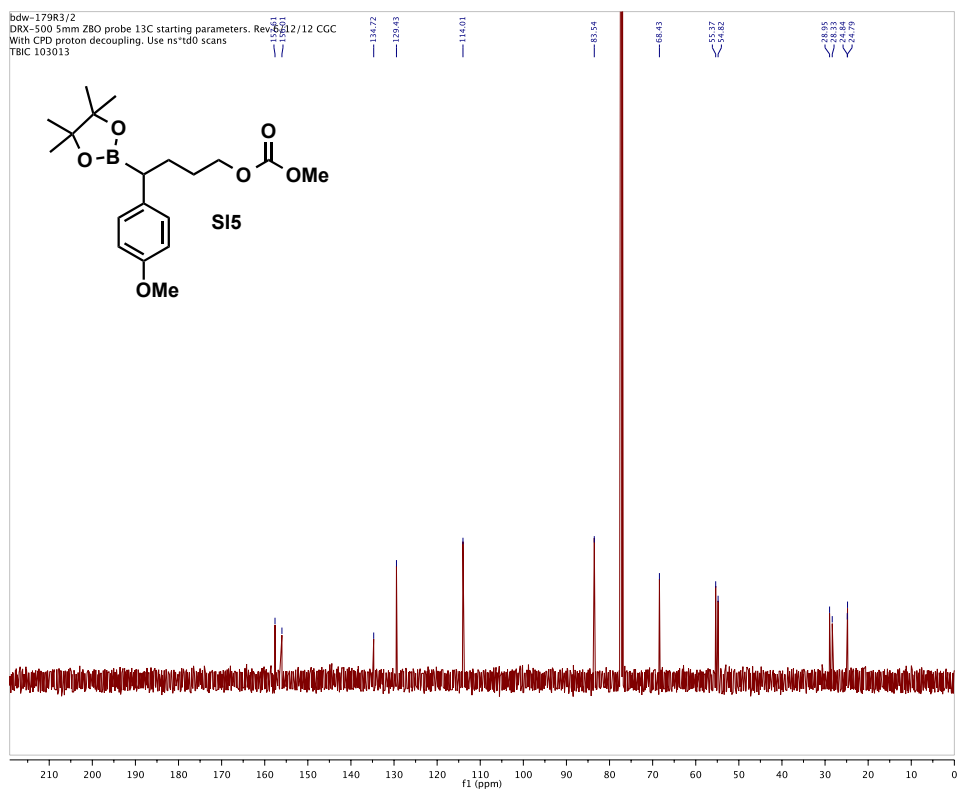

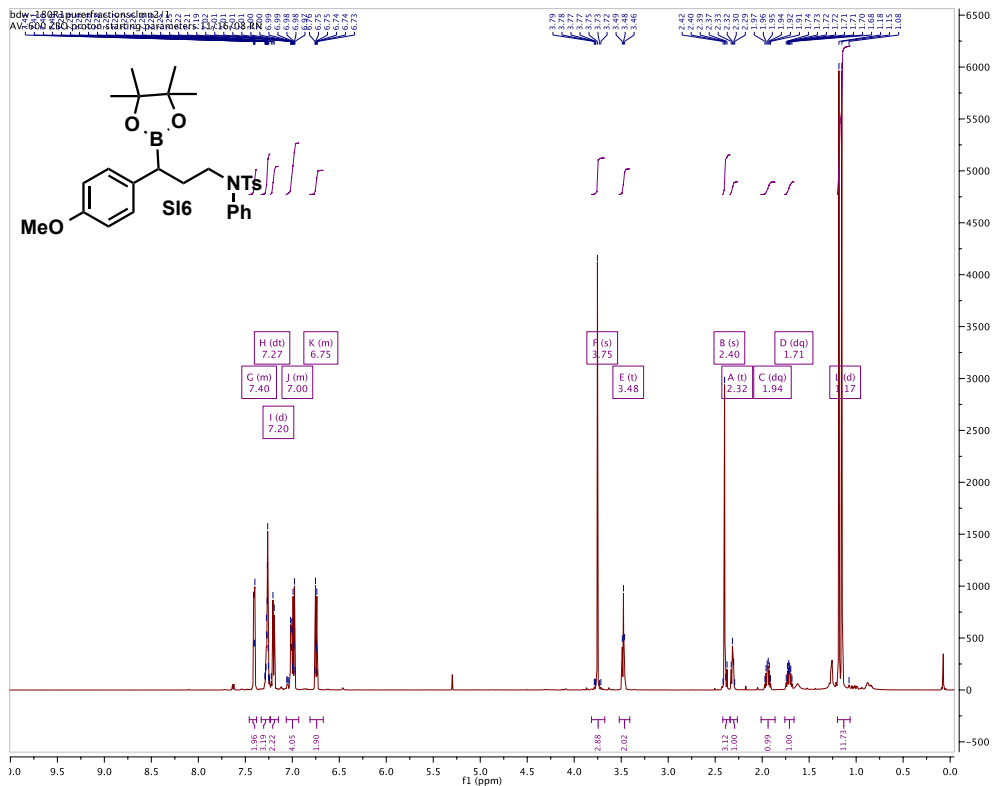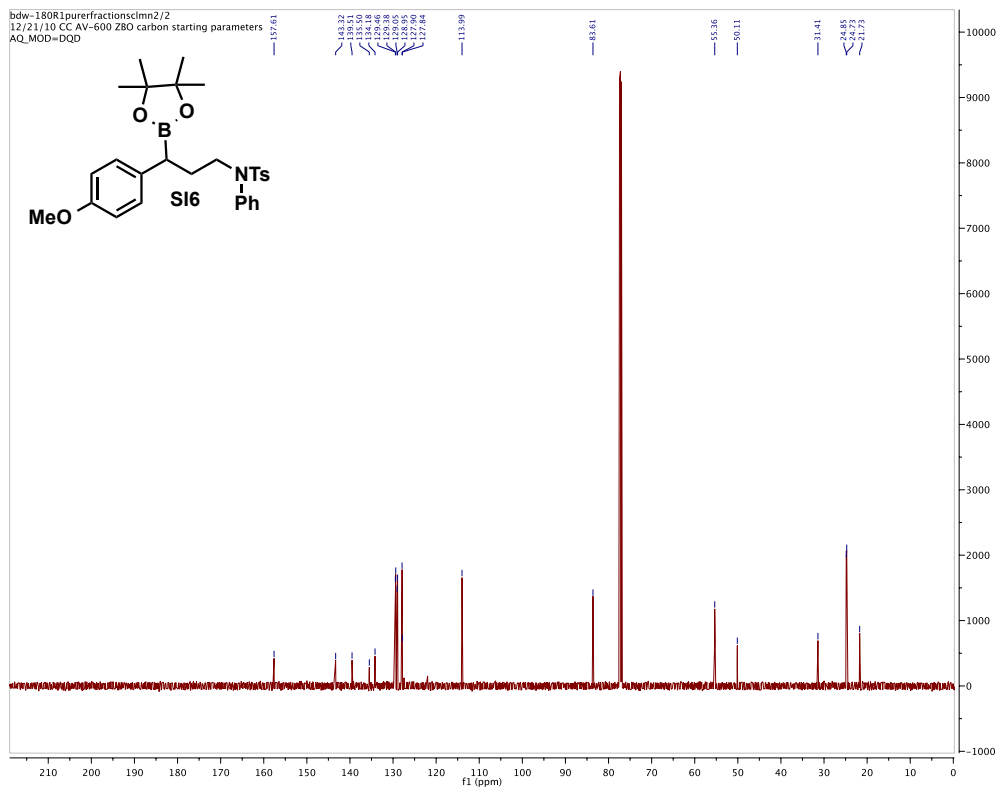



bdw-179R1.1.fid  
1H starting parameters (zg30)  
DRX-500 TBIC  
4/22/14 CGC

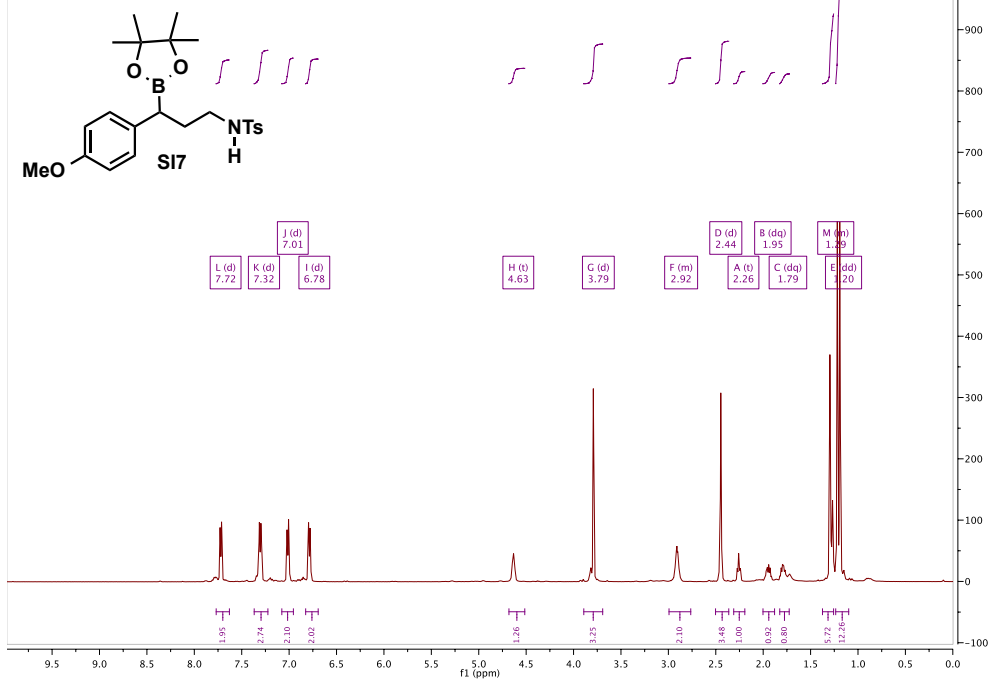

bdw-179R1.2.fid  
DRX-500 5mm Z80 probe 13C starting parameters. Rev6/12/12 CGC  
With CPD proton decoupling. Use ns\*td0 scans  
TBIC 103013

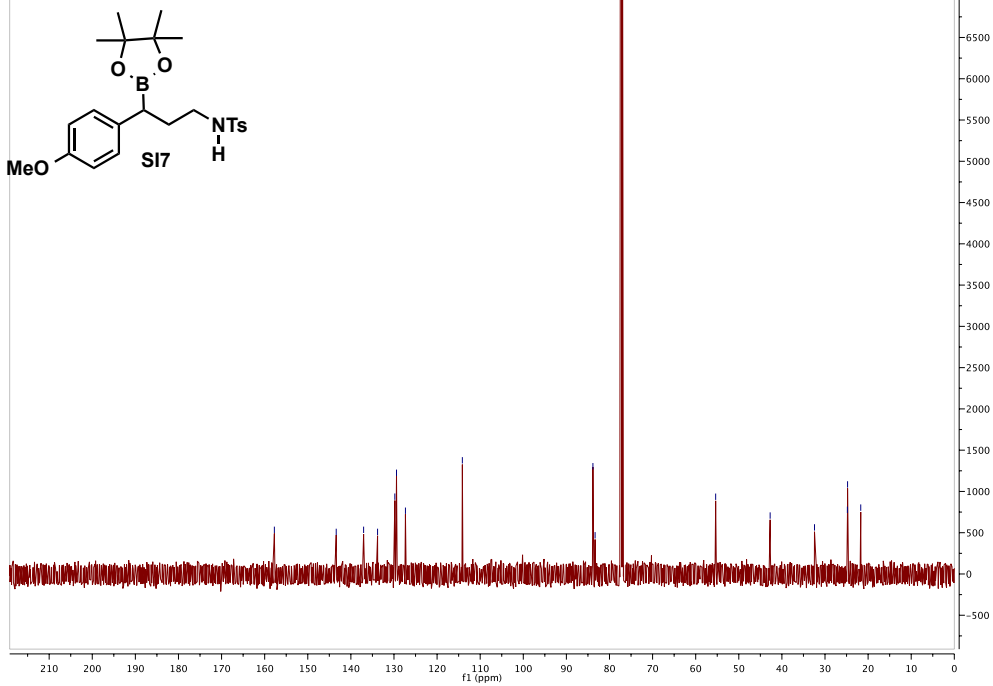

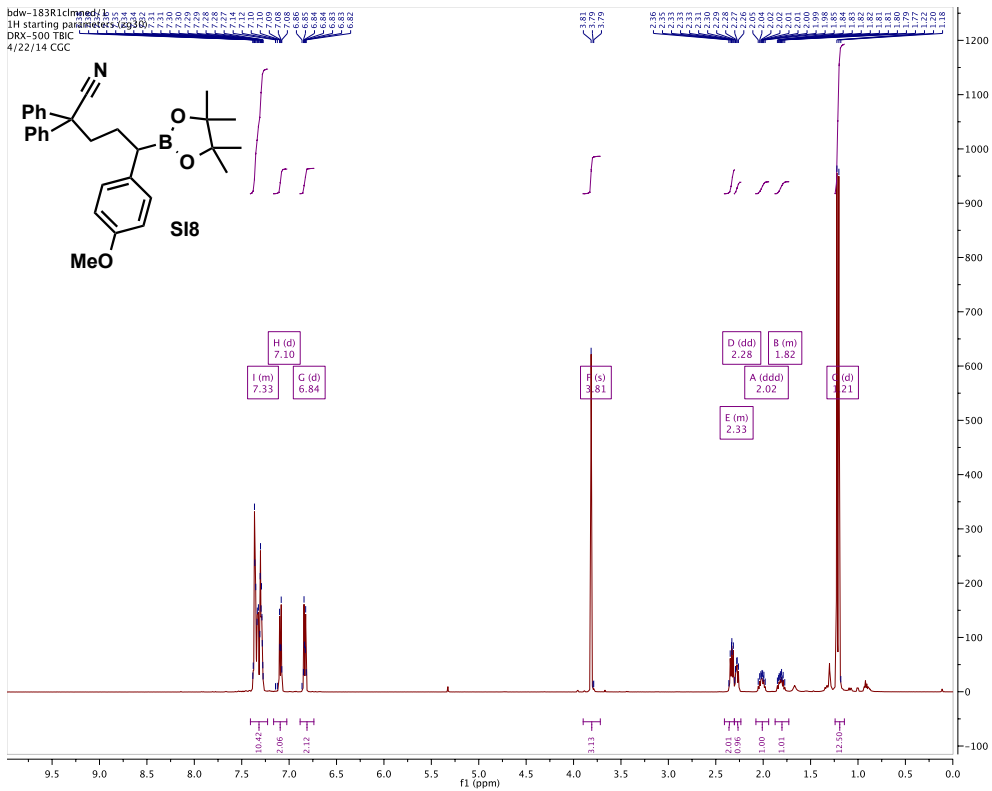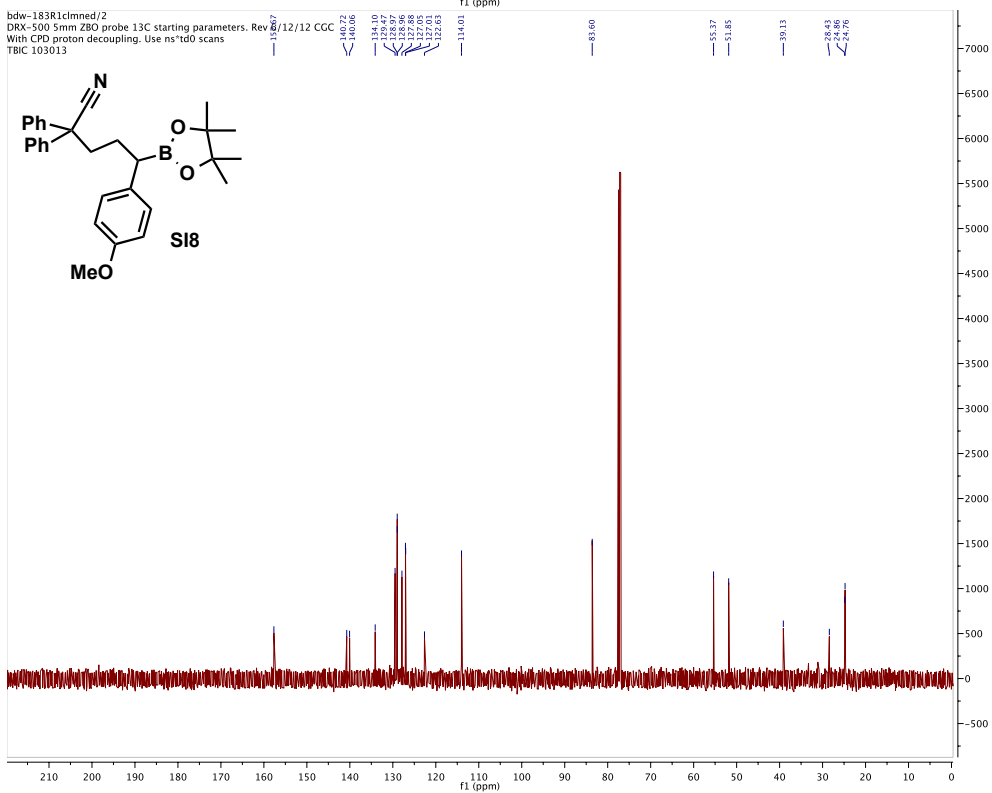

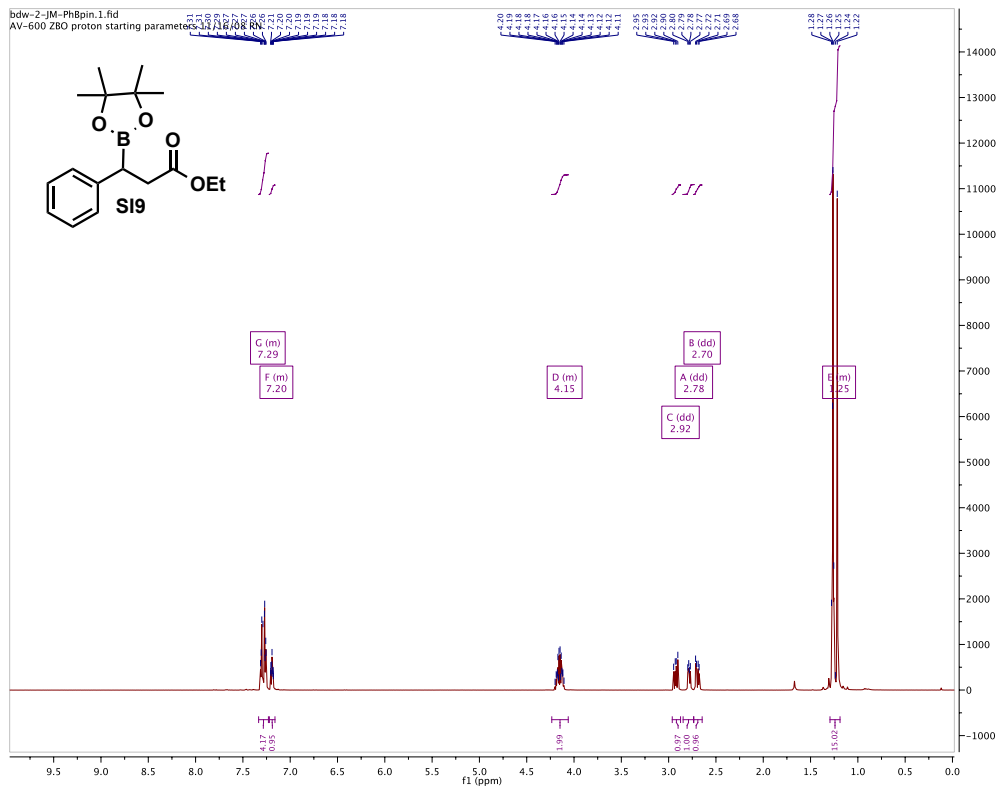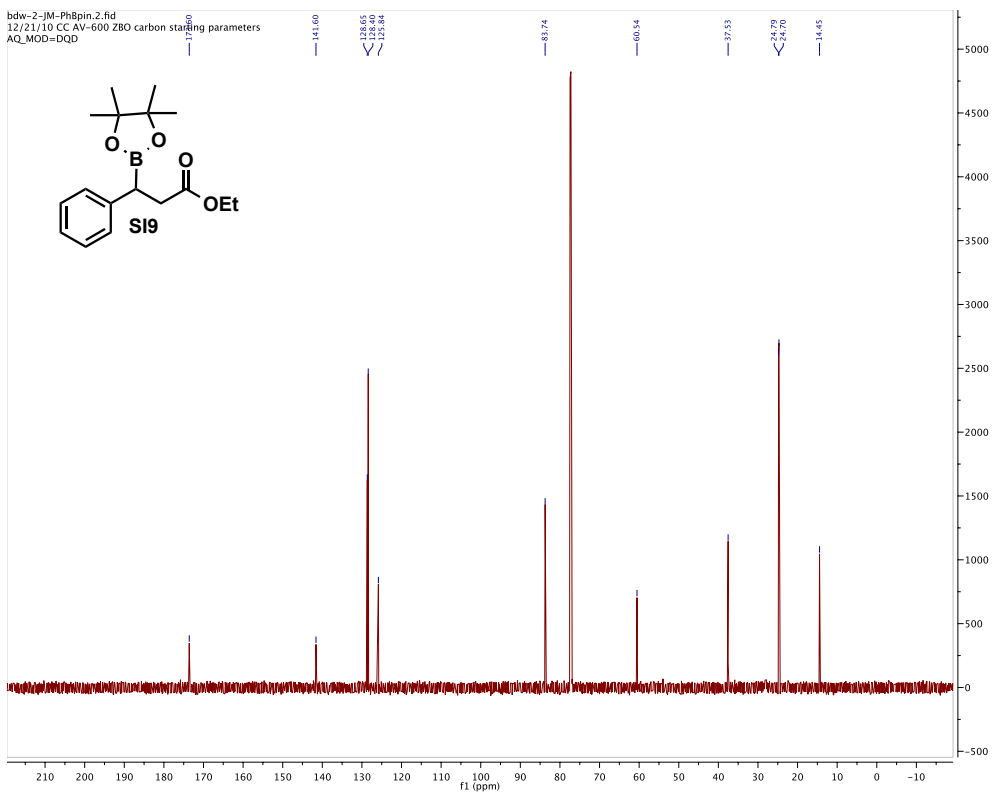

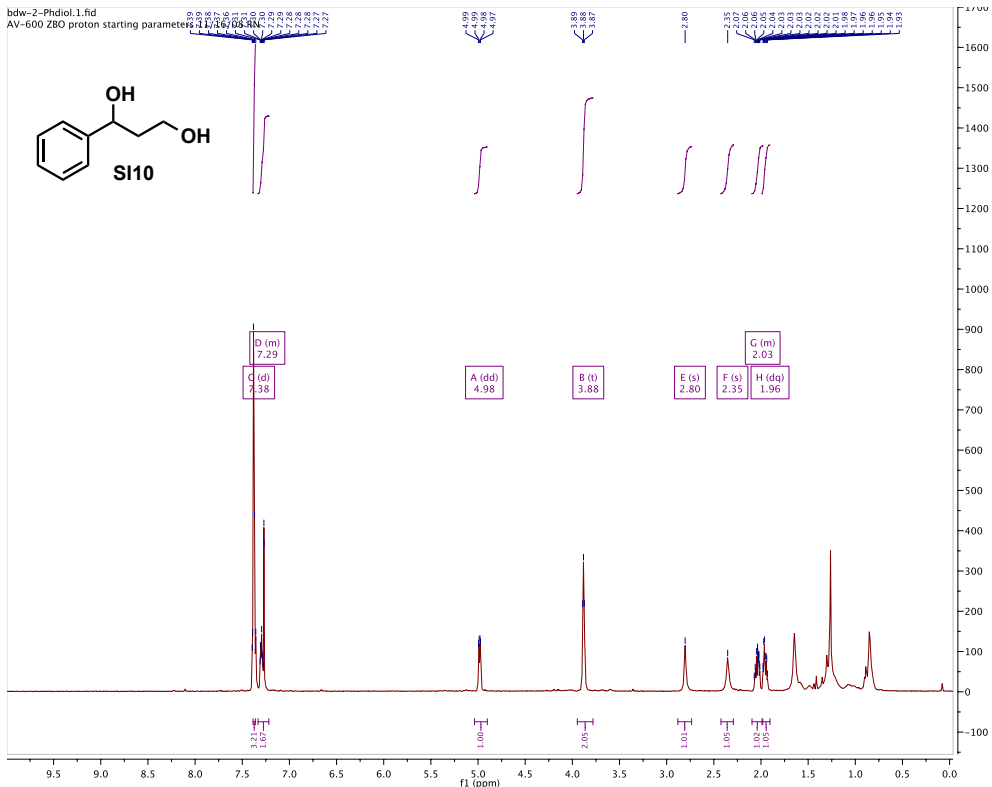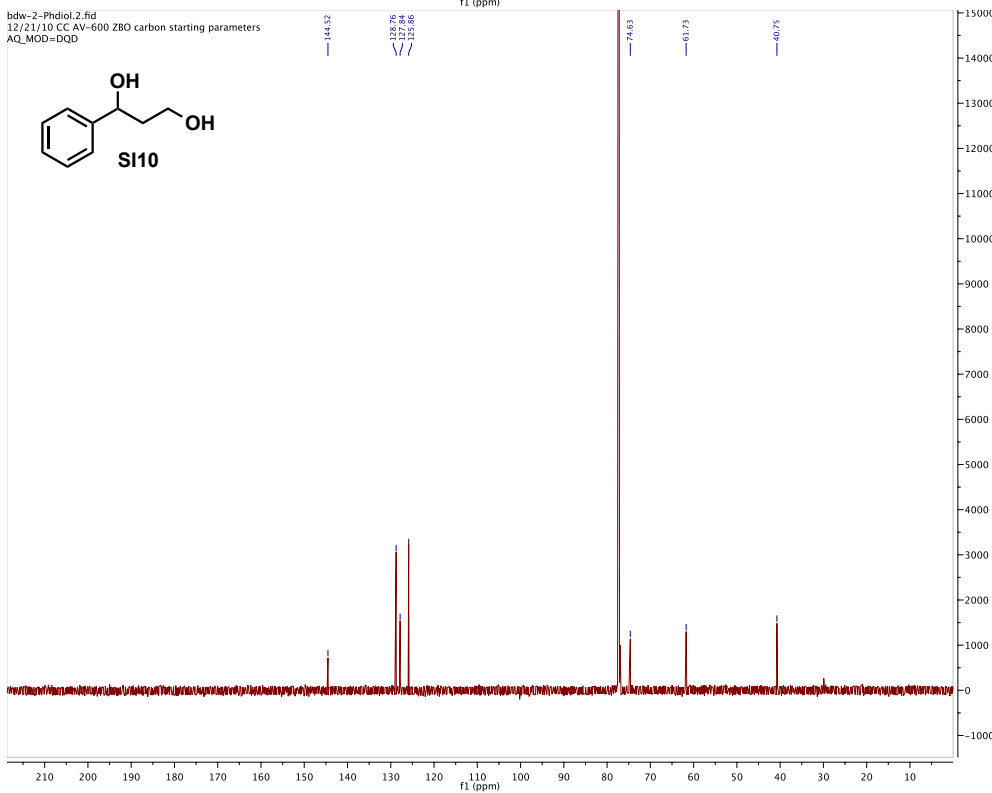

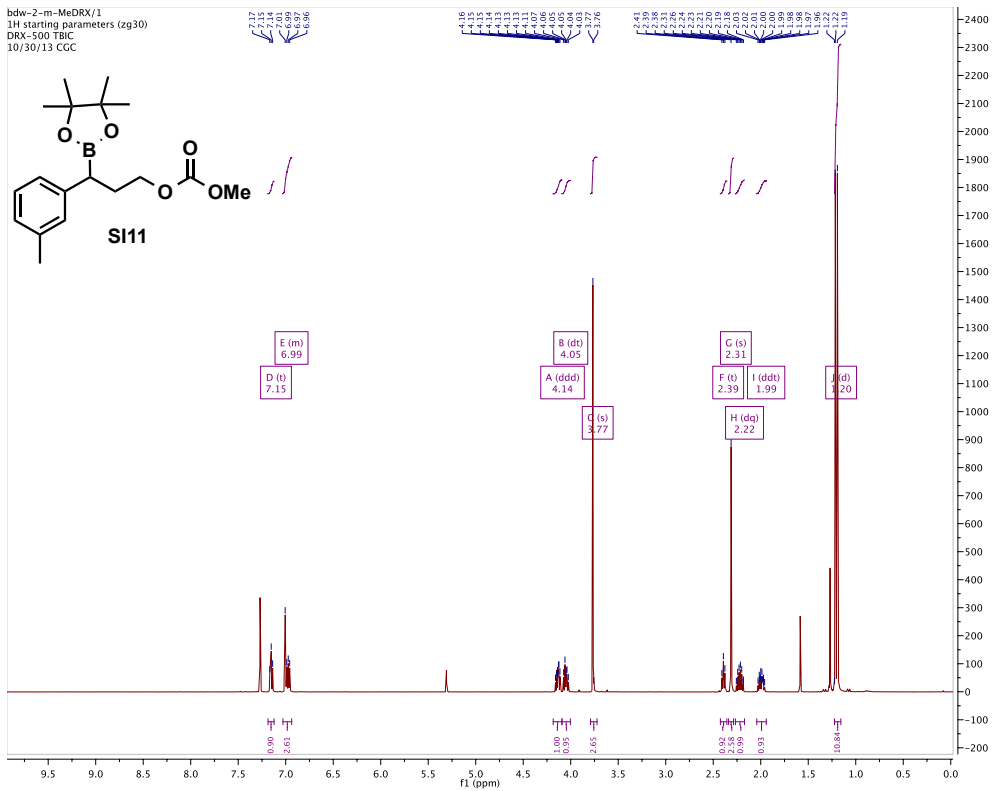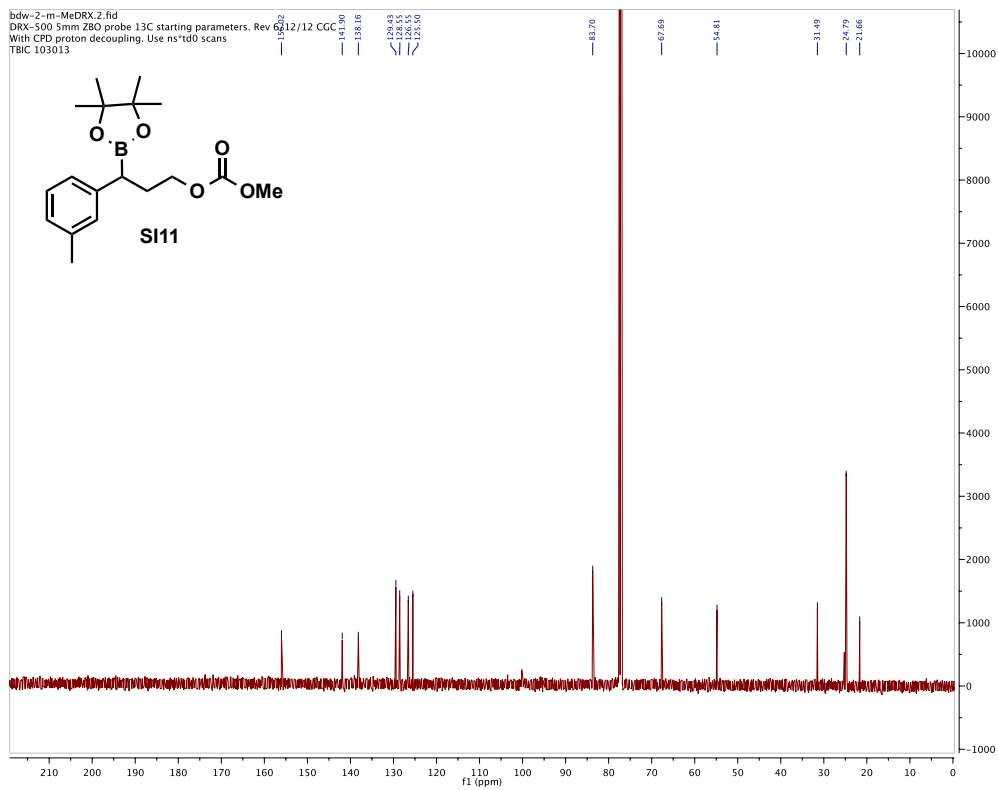

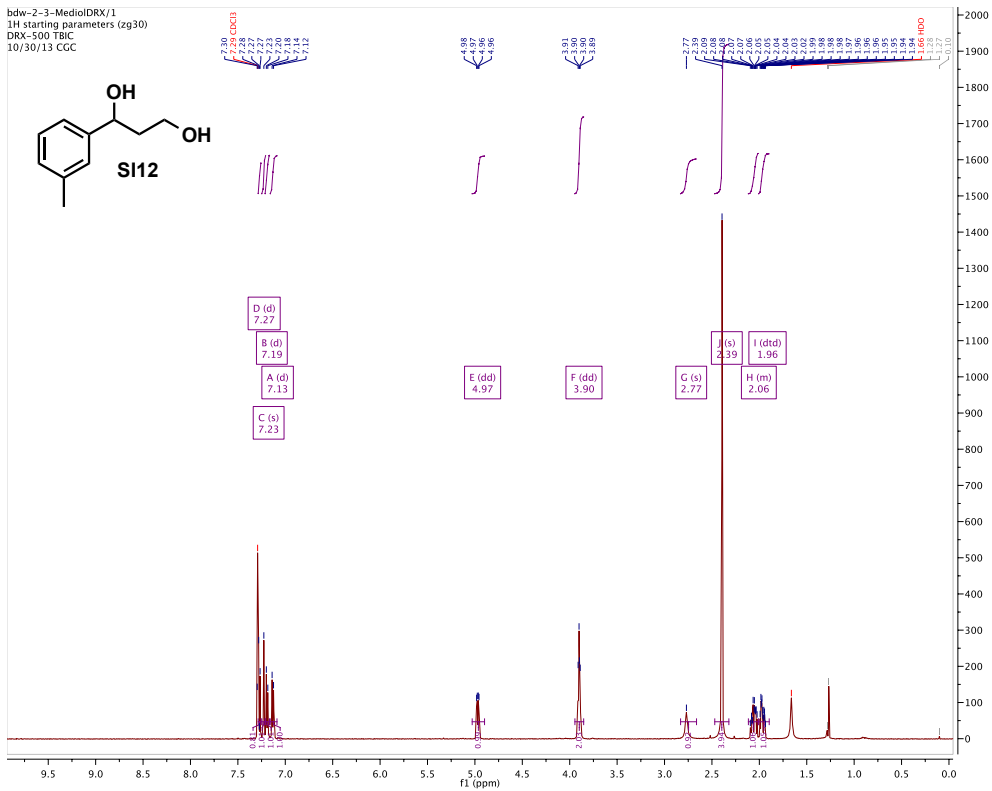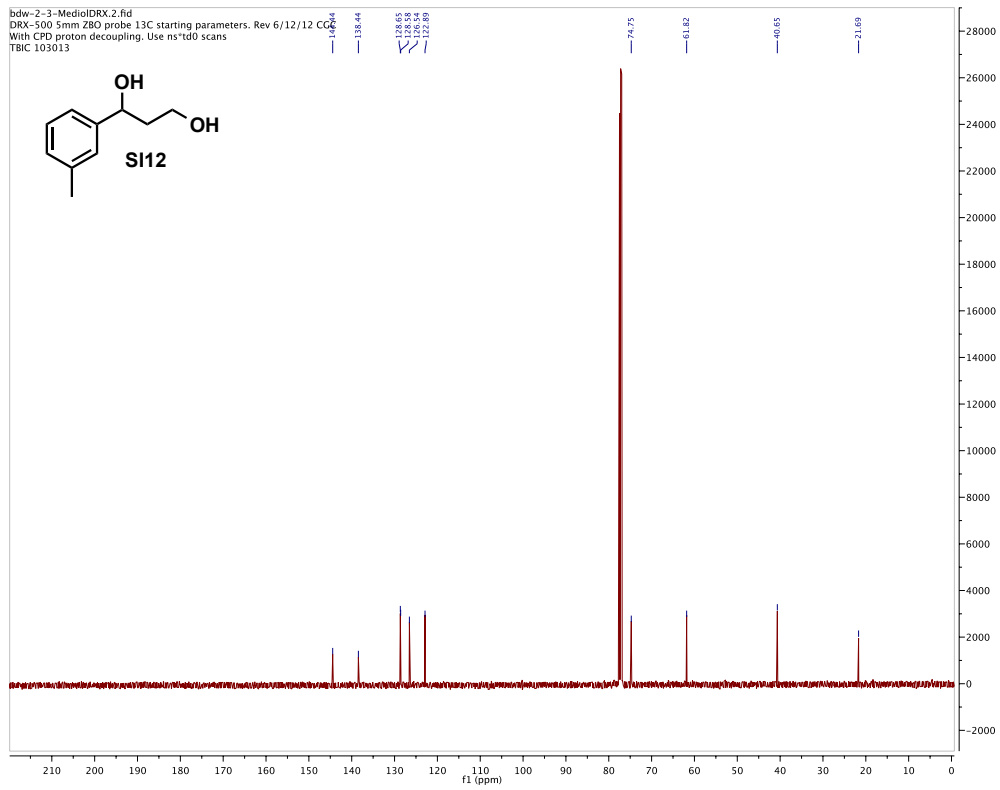

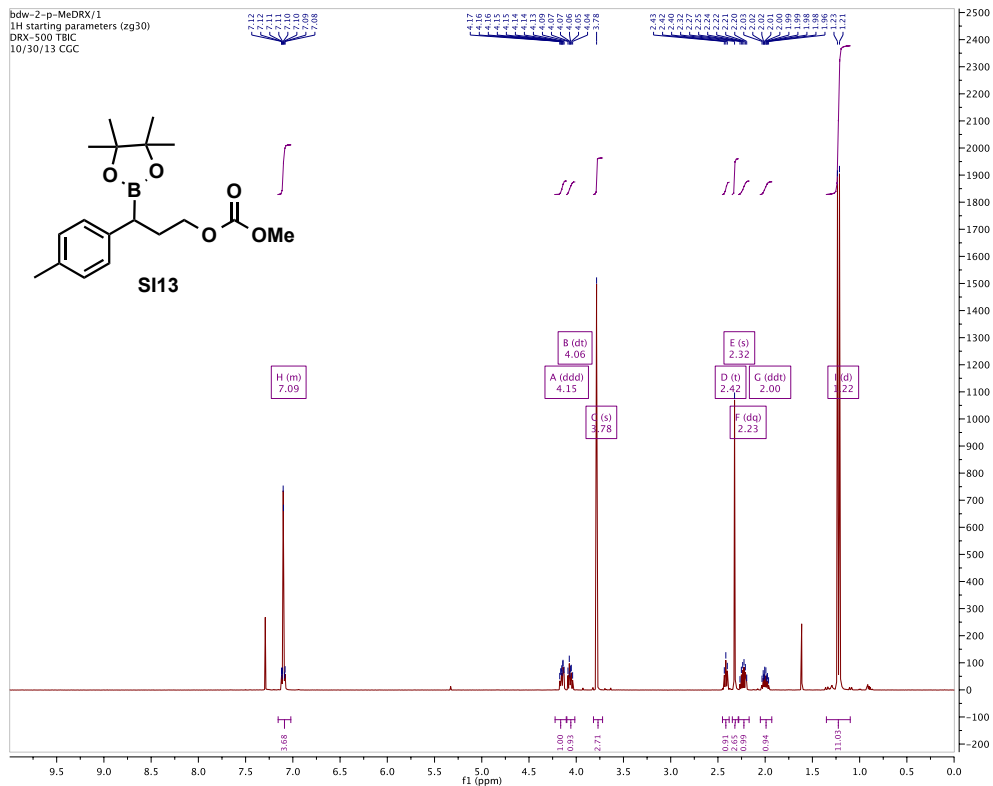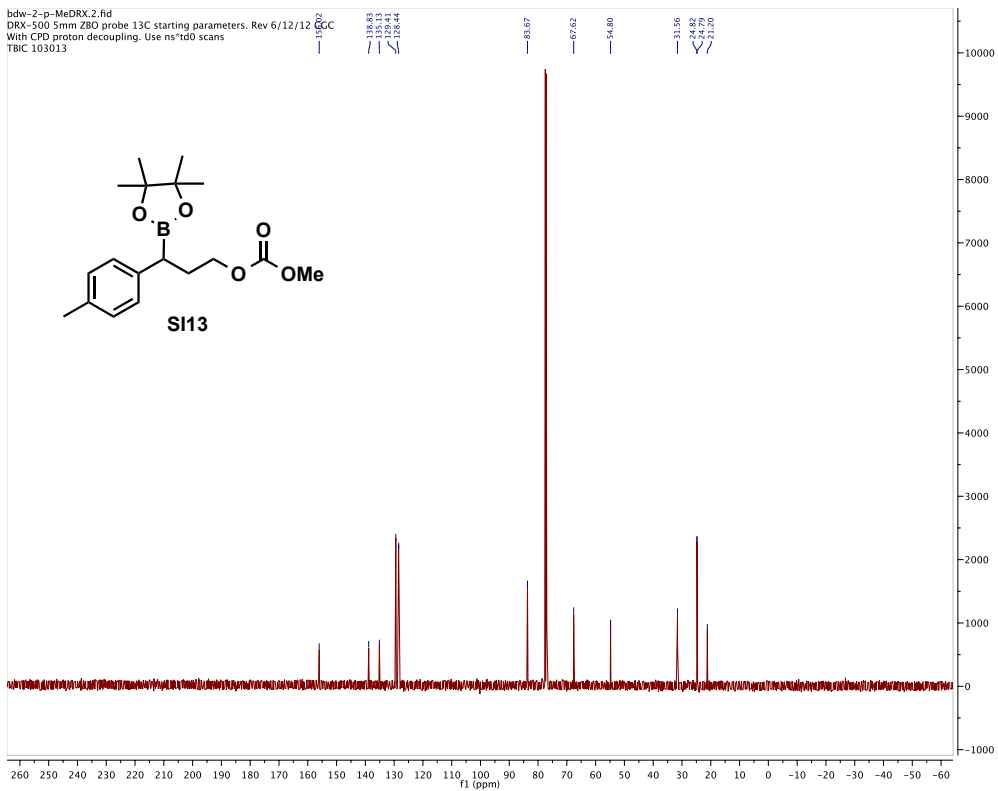

bdw-2-4-MediolDRX/1  
 1H starting parameters (zg30)  
 DRX-500 TBIC  
 10/30/13 CGC

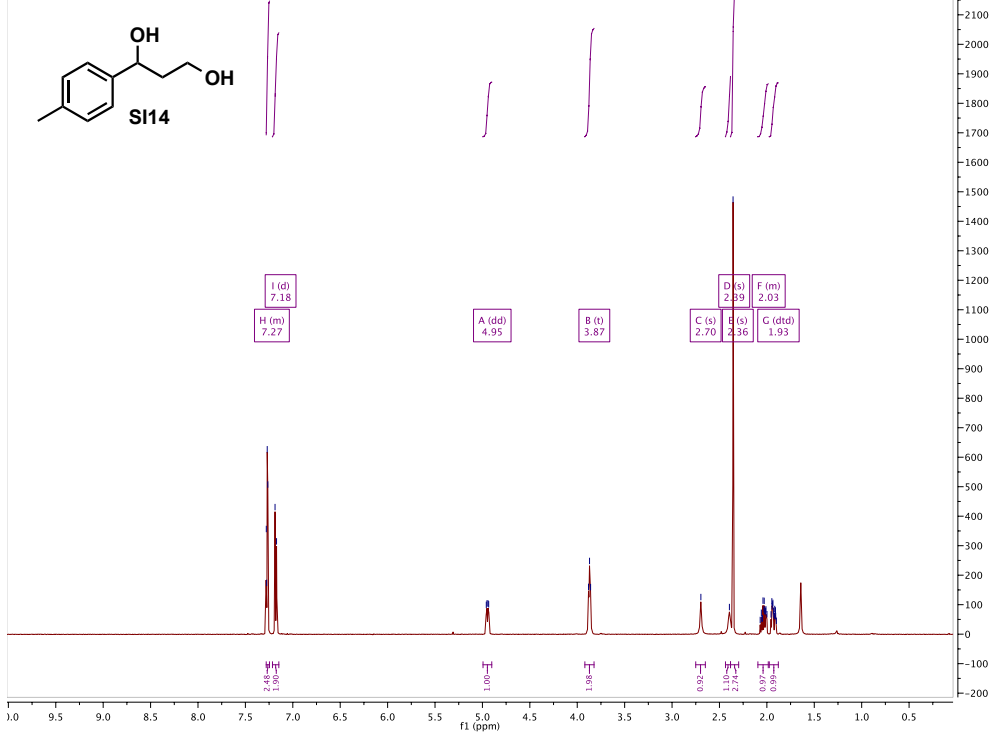

bdw-2-4-MediolDRX.2.fid  
 DRX-500 5mm Z80 probe 13C starting parameters. Rev 6/12/12 CGC  
 With CPD proton decoupling. Use ns\*td0 scans  
 TBIC.105013

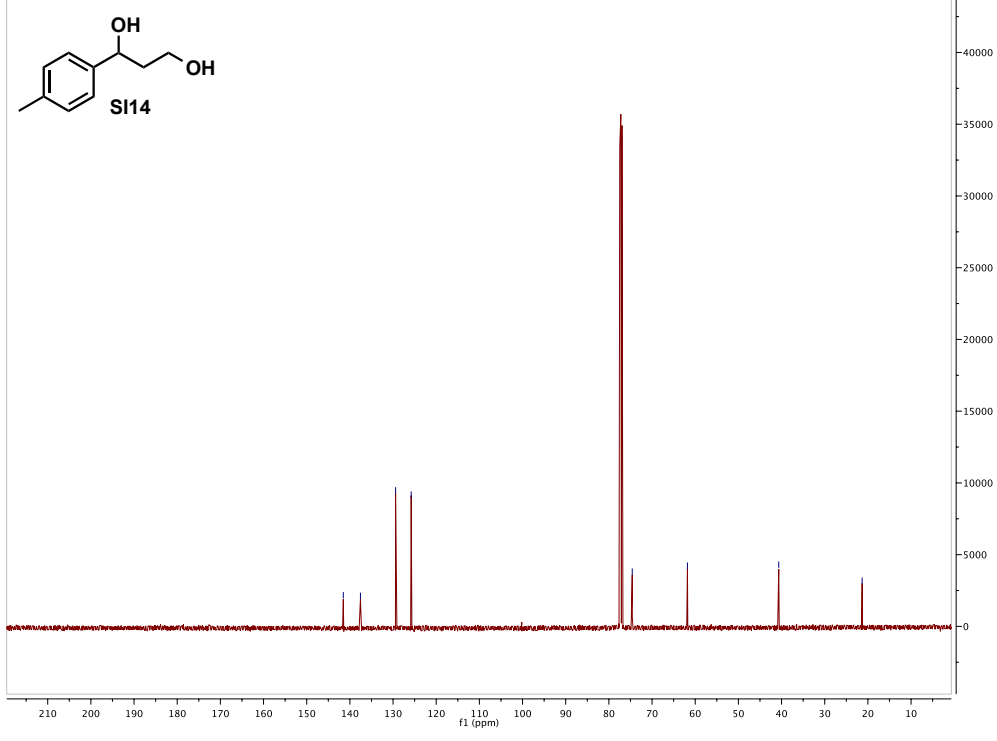



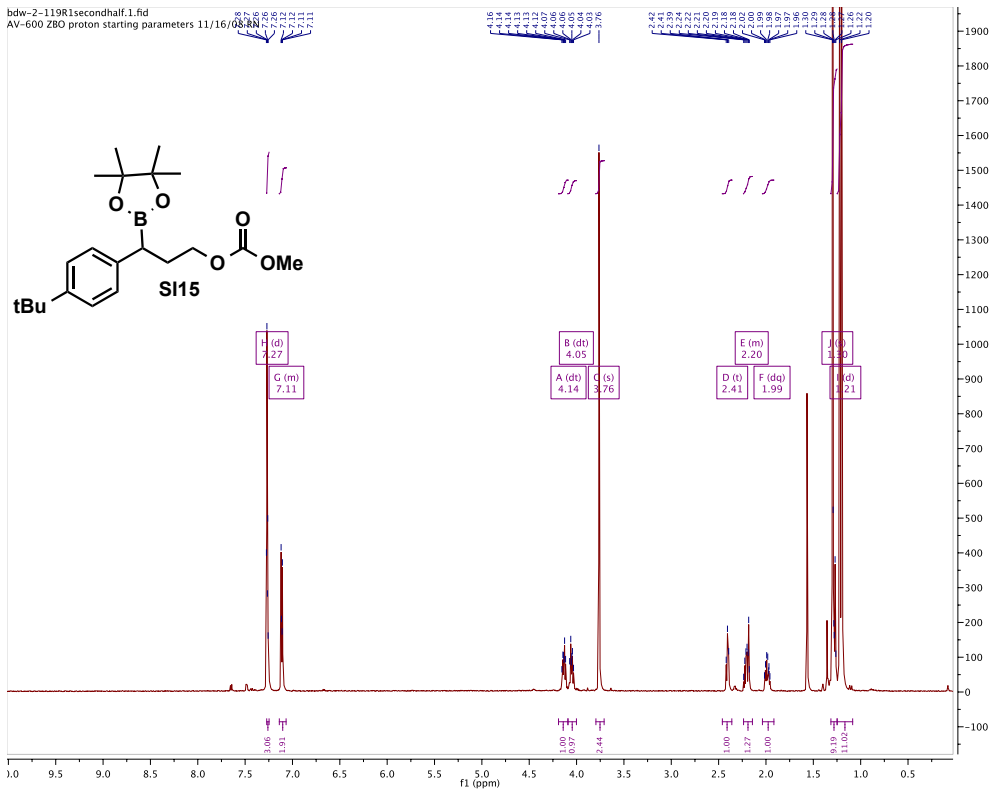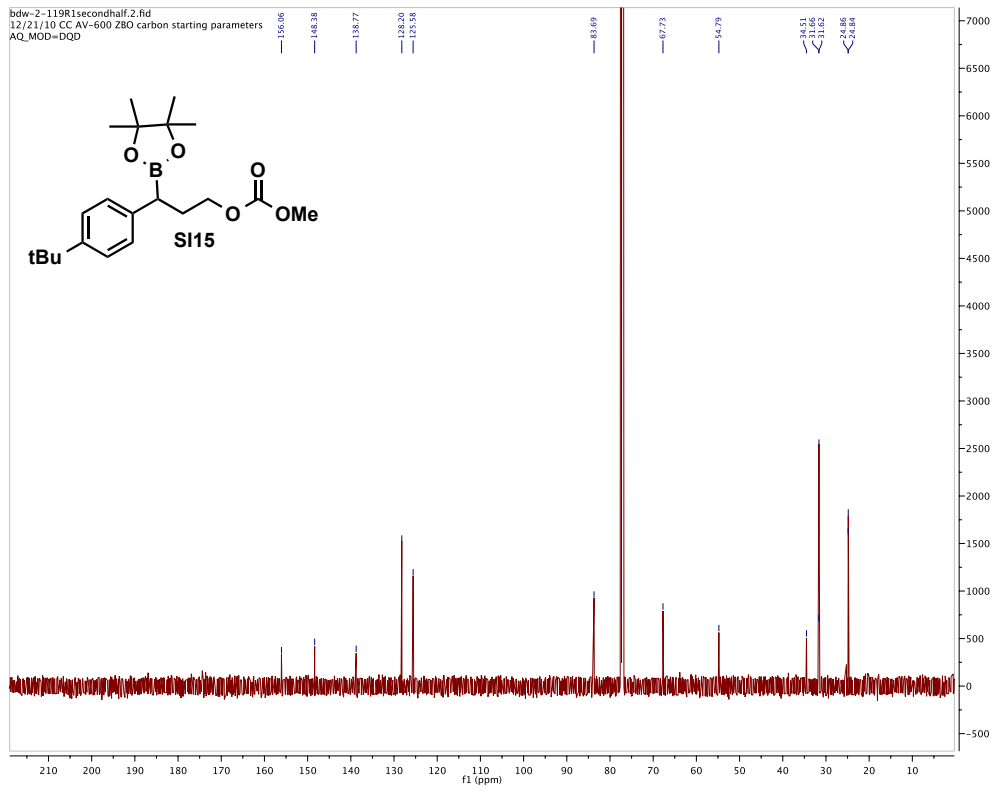

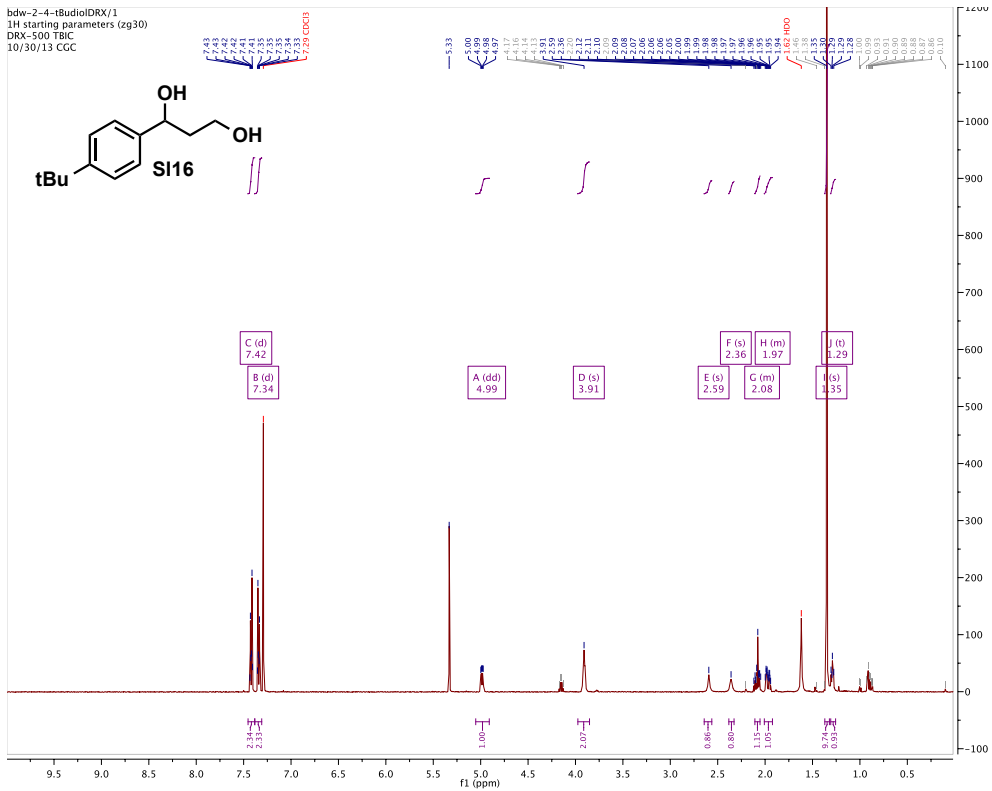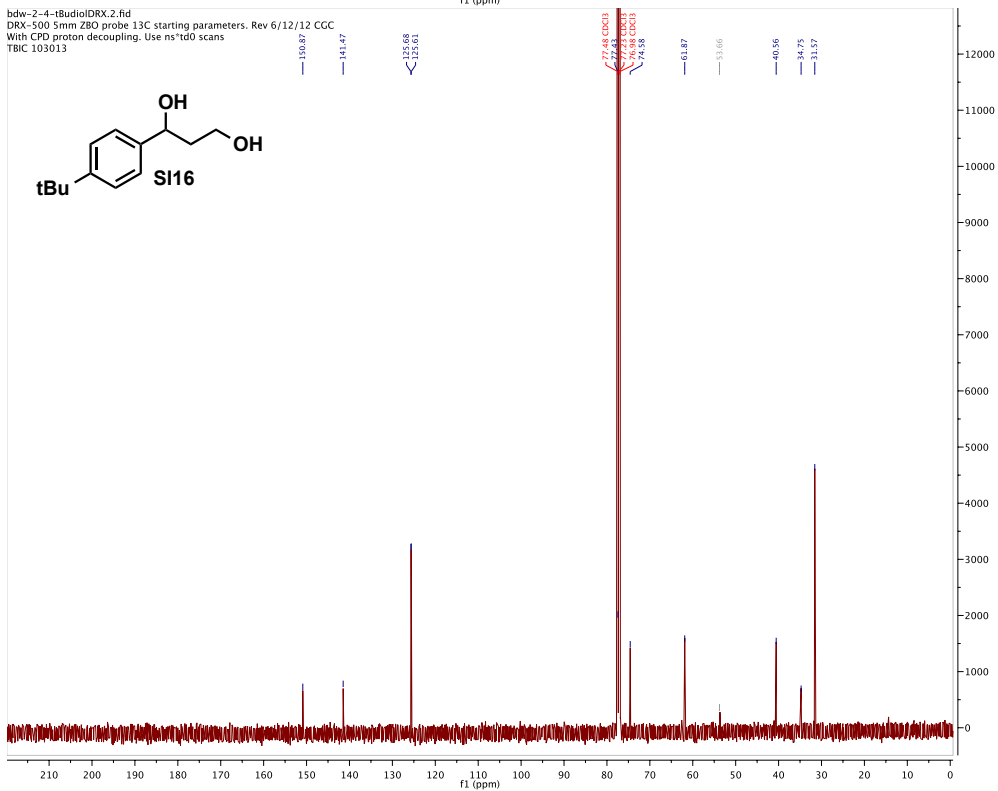

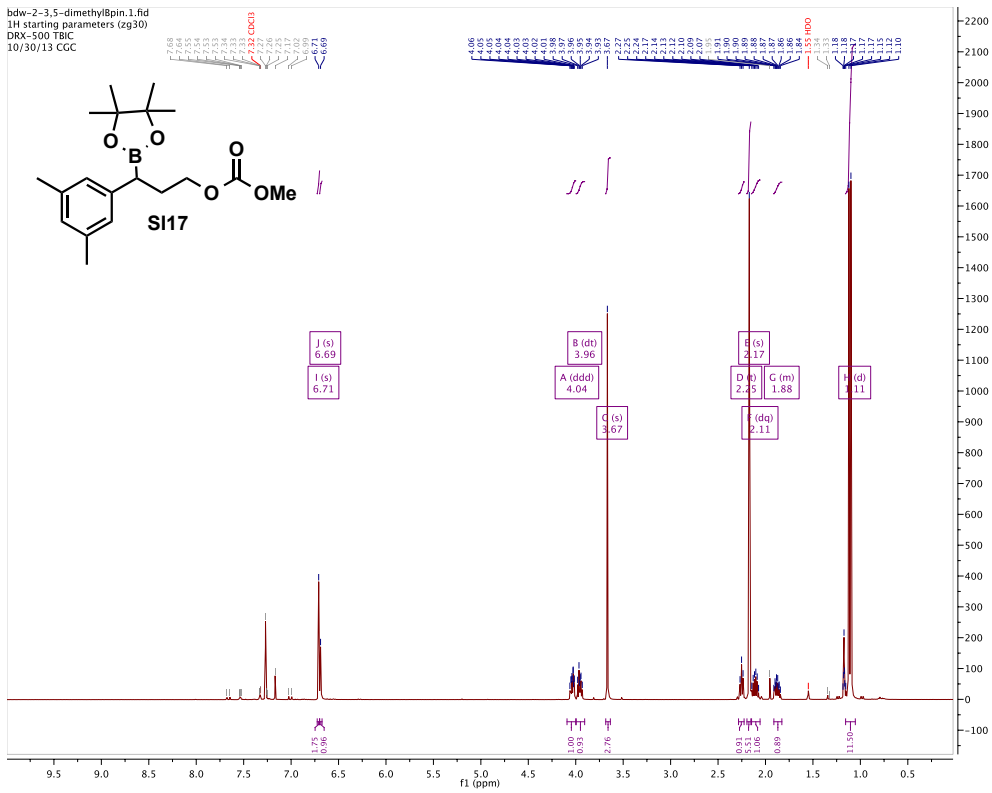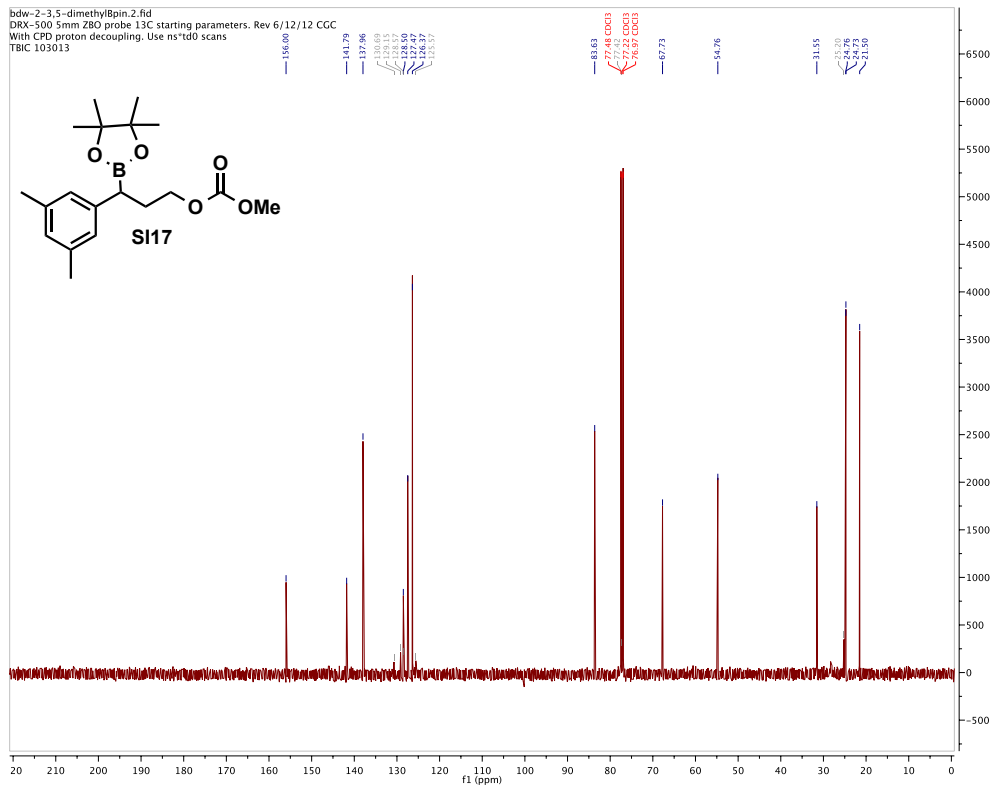

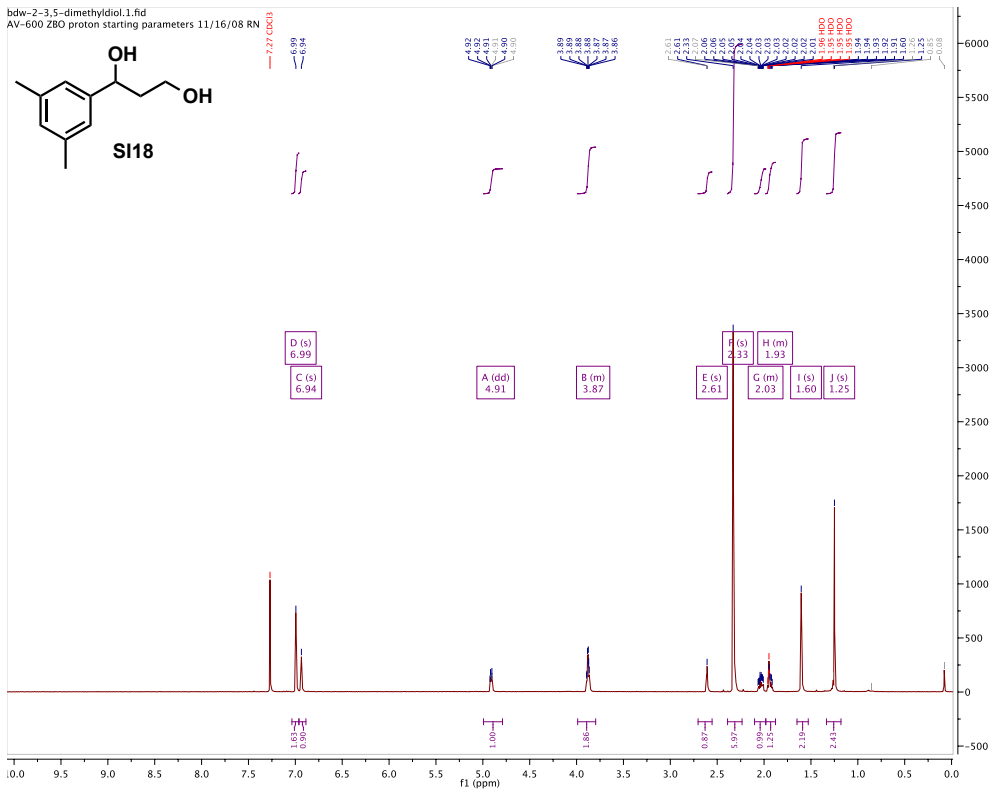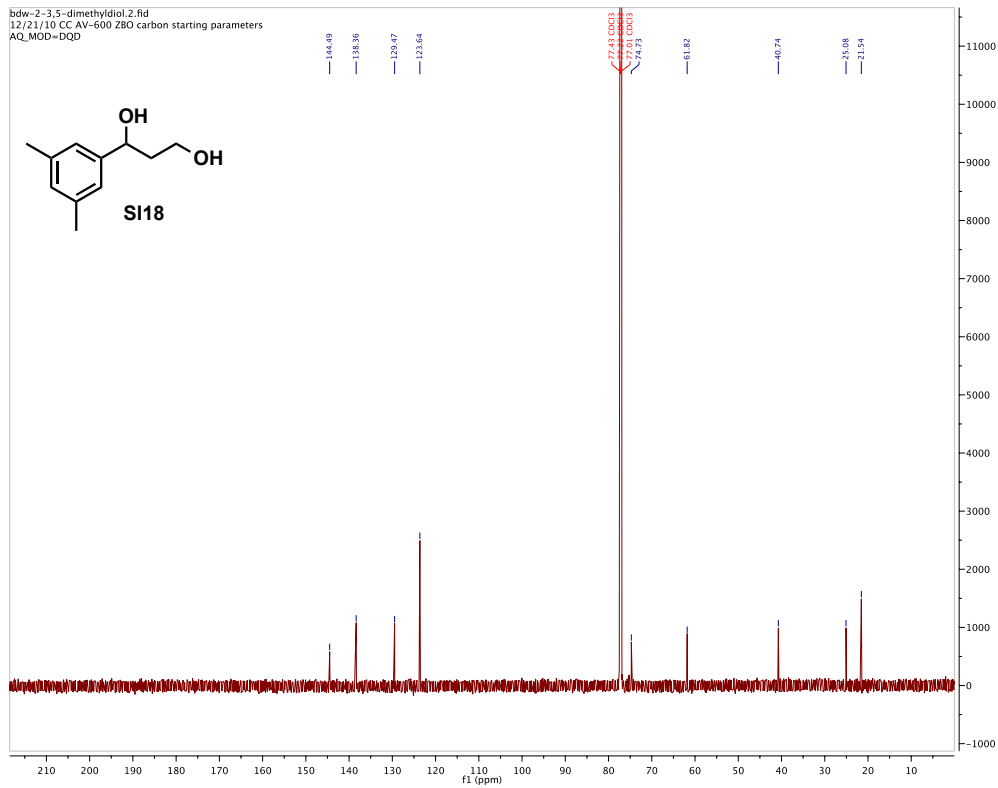

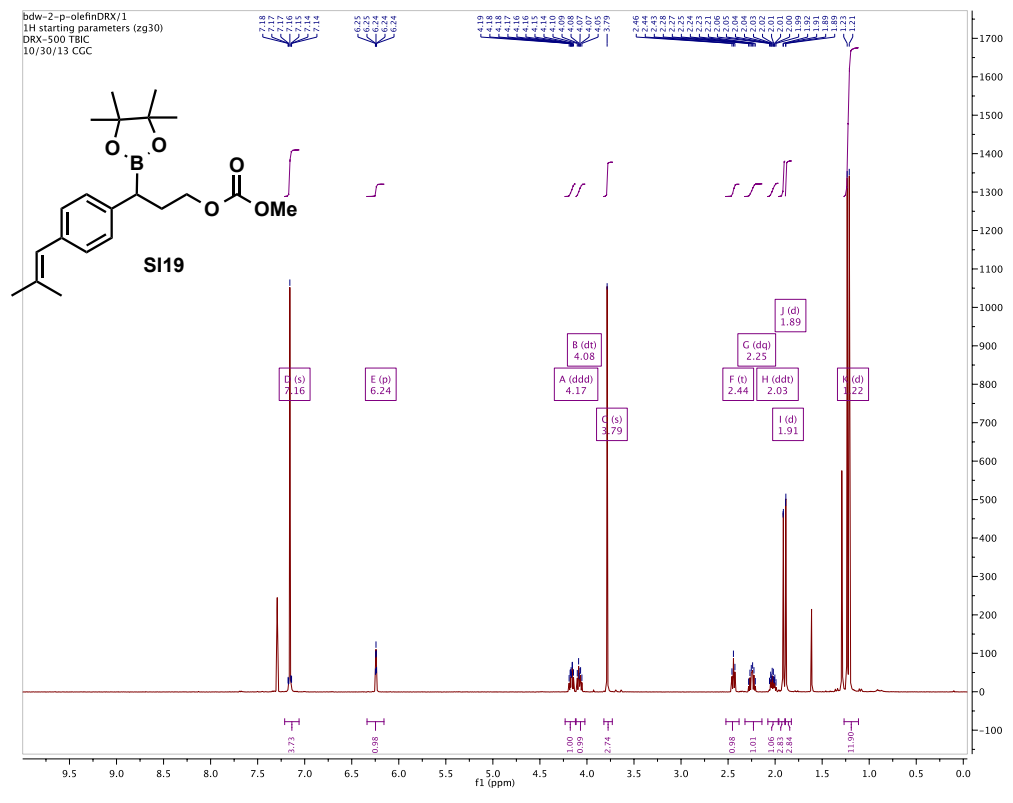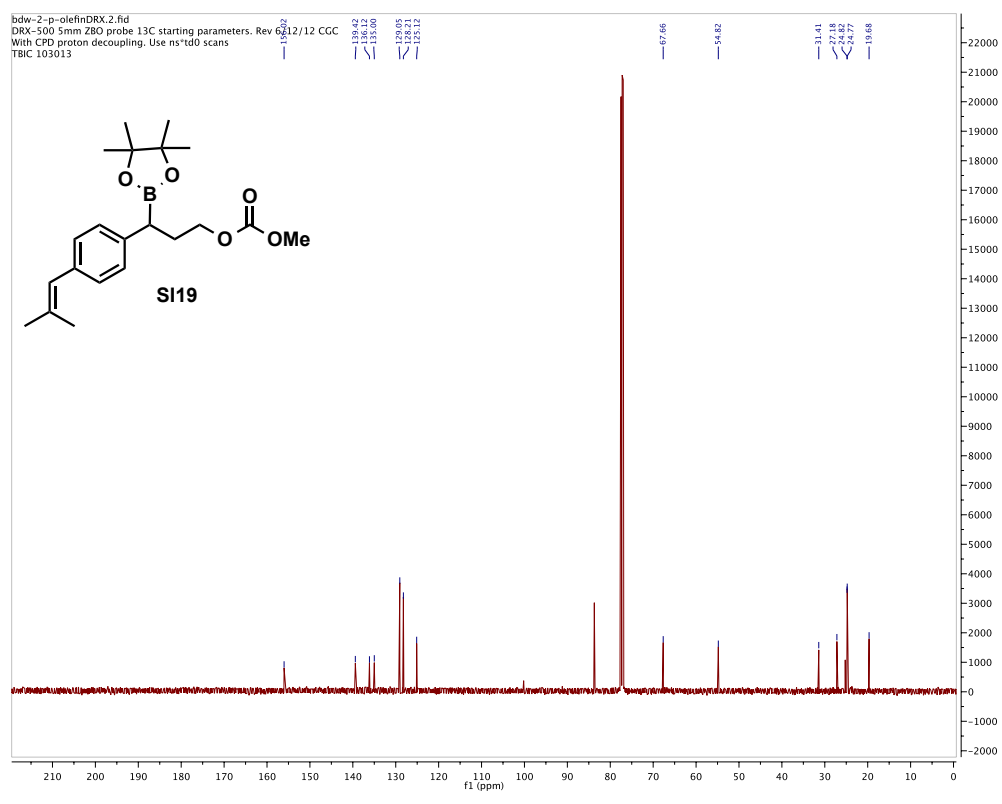

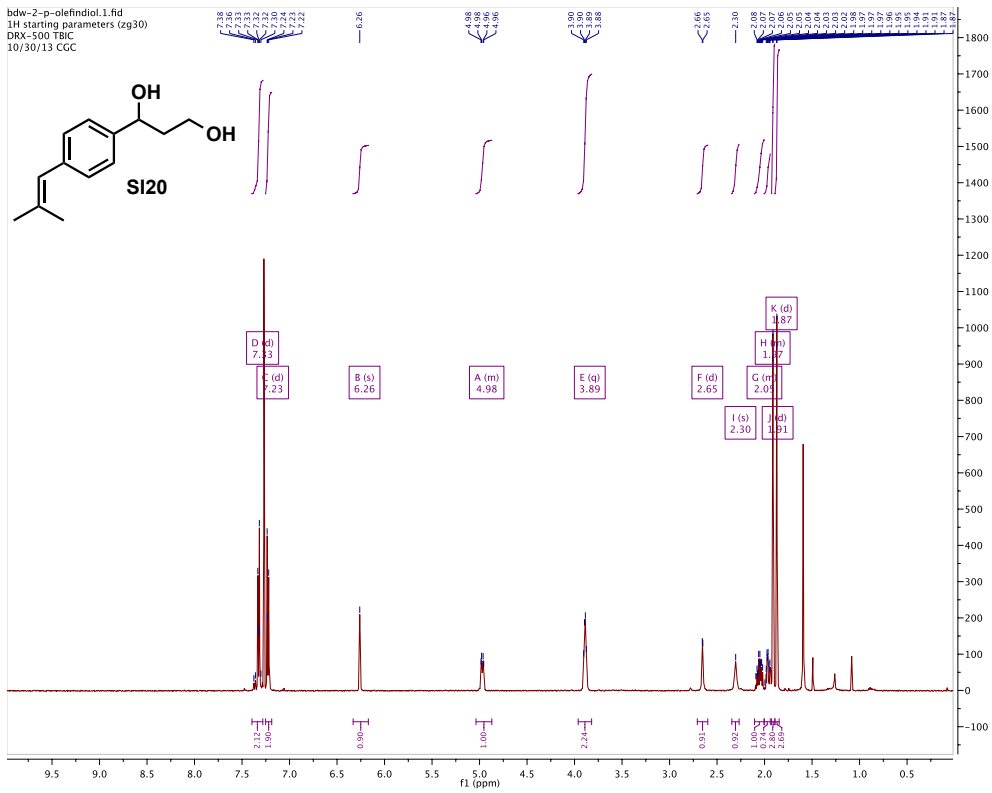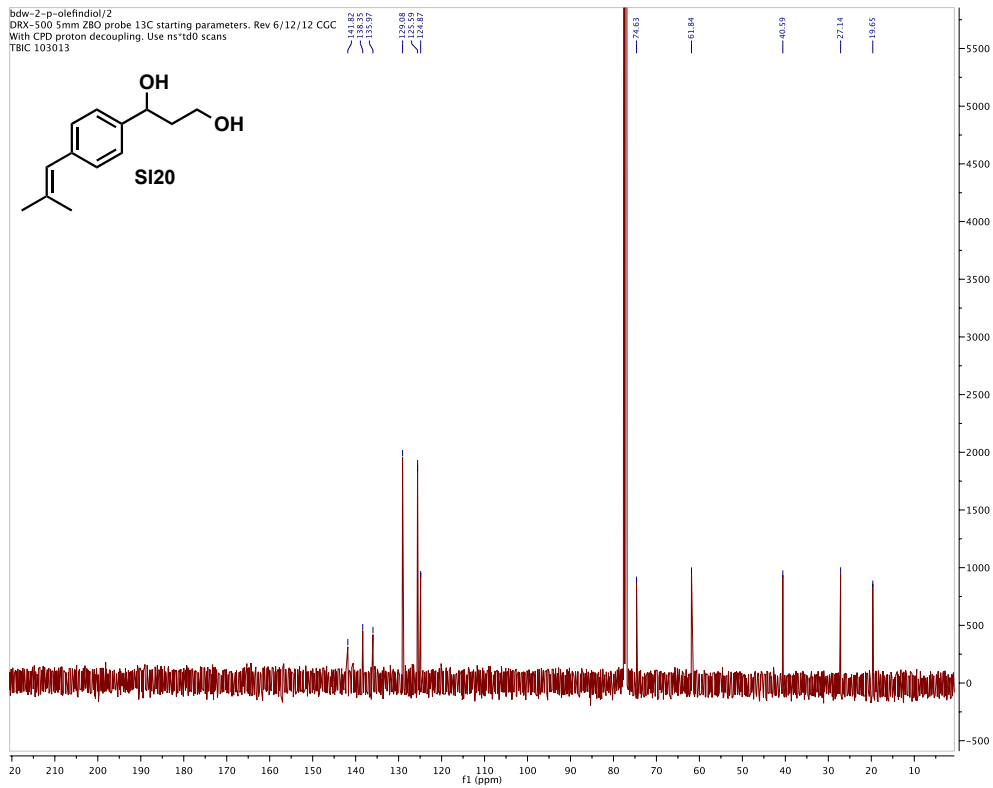

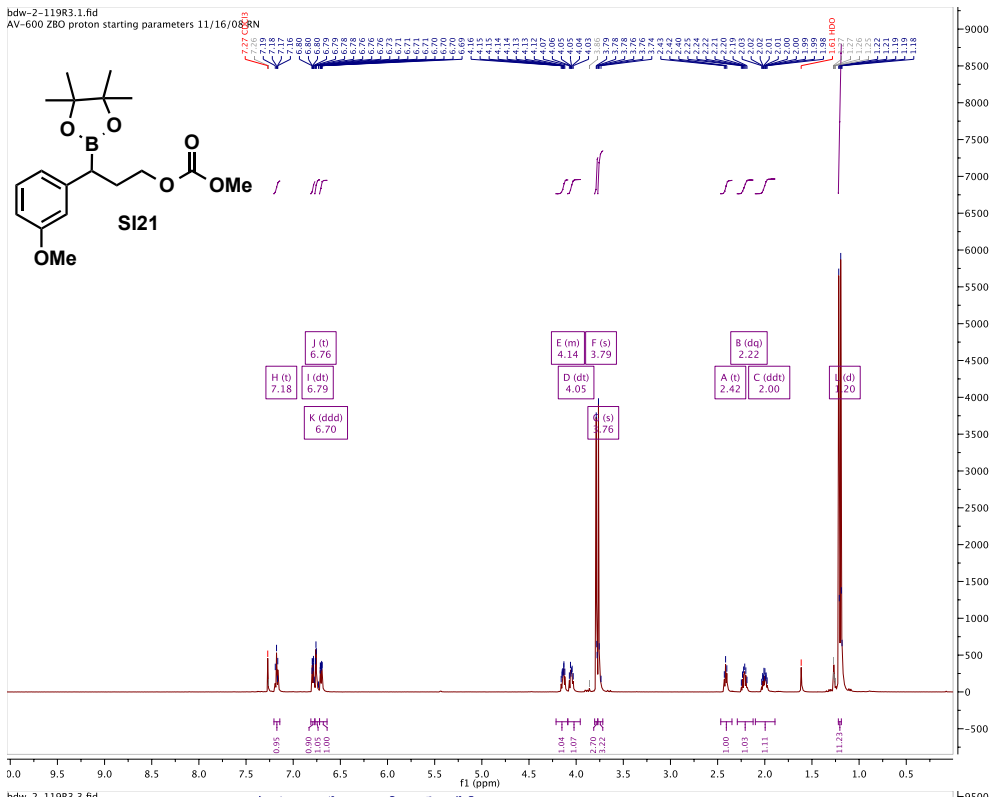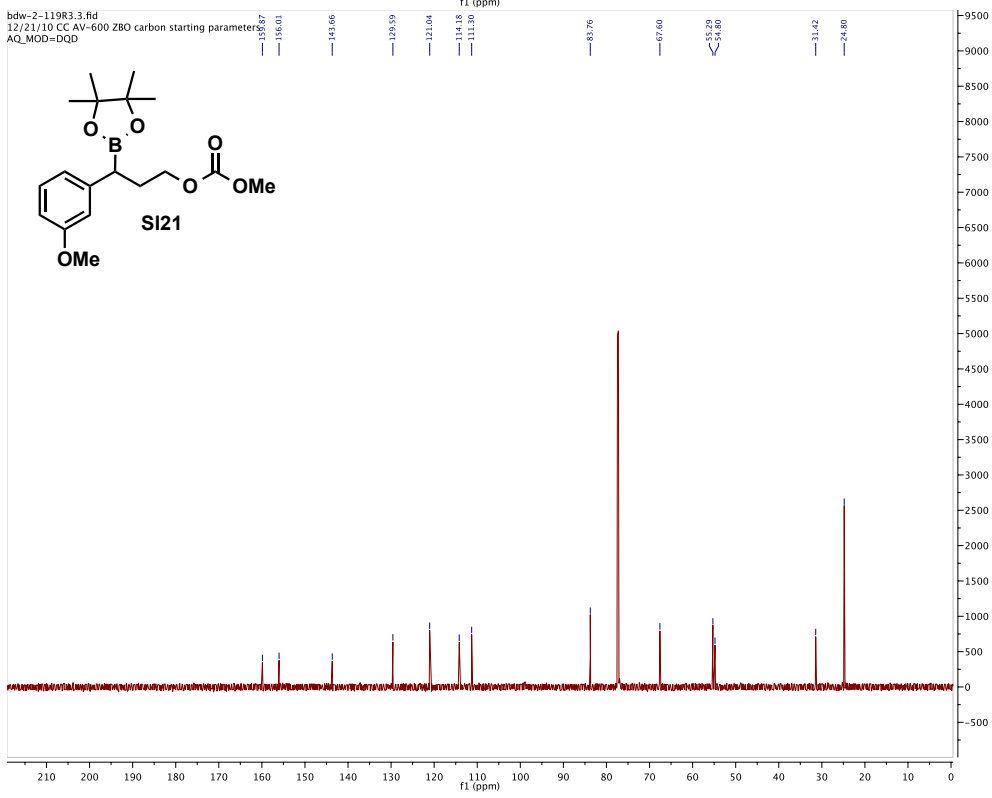

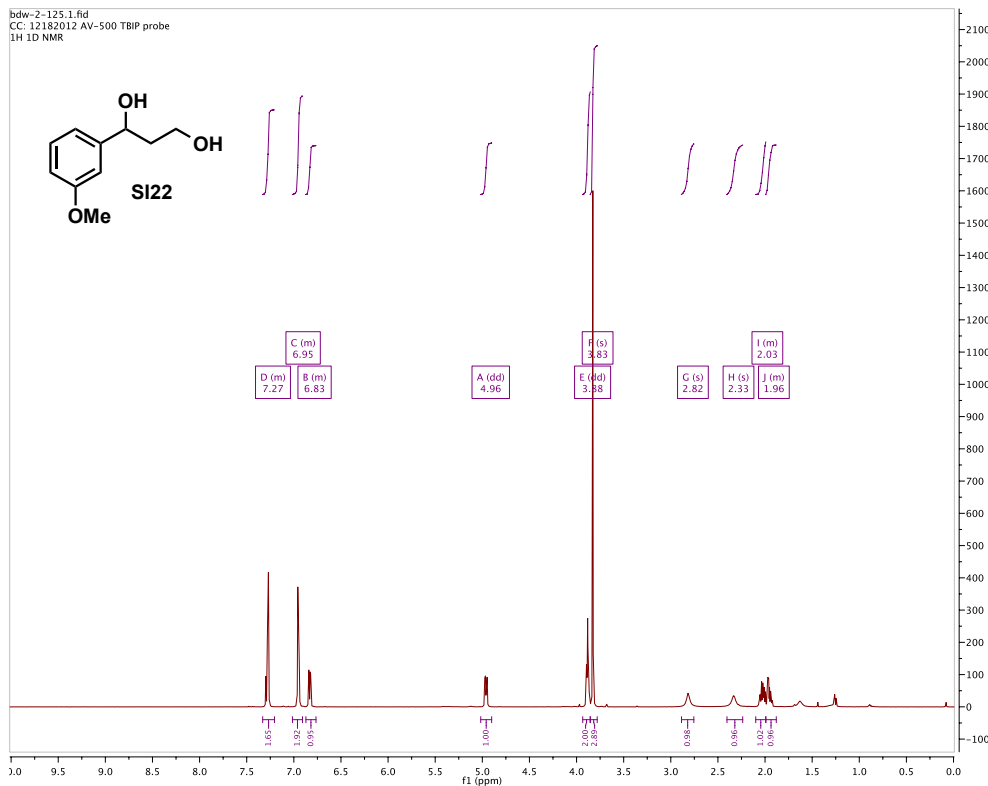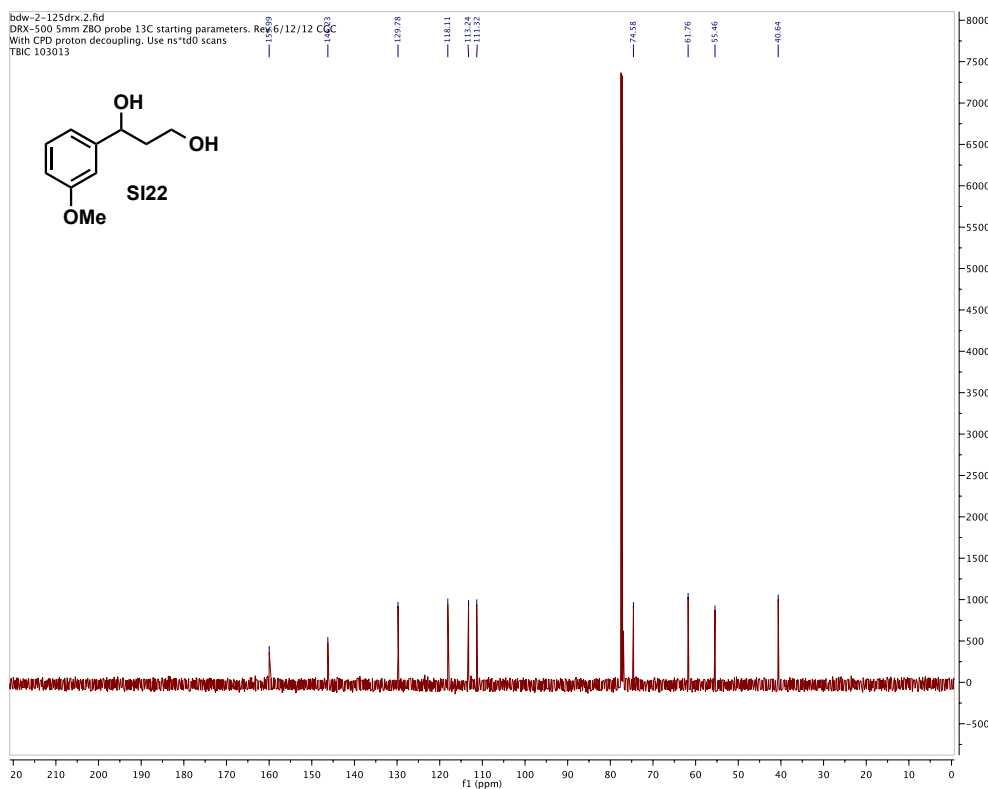



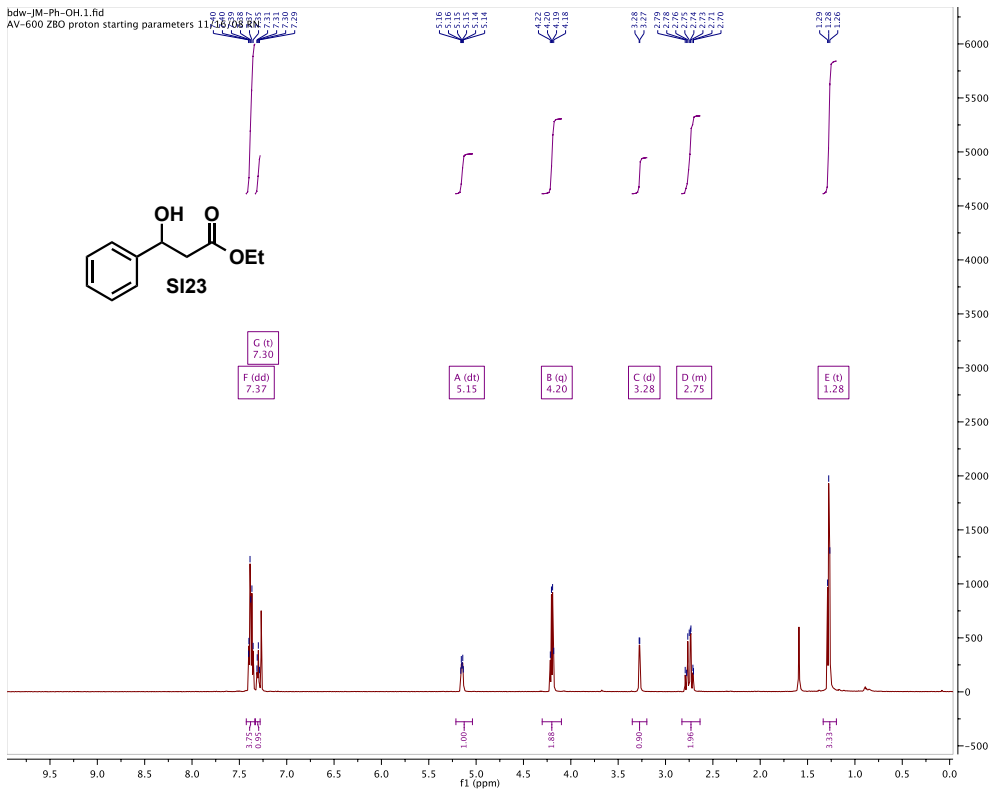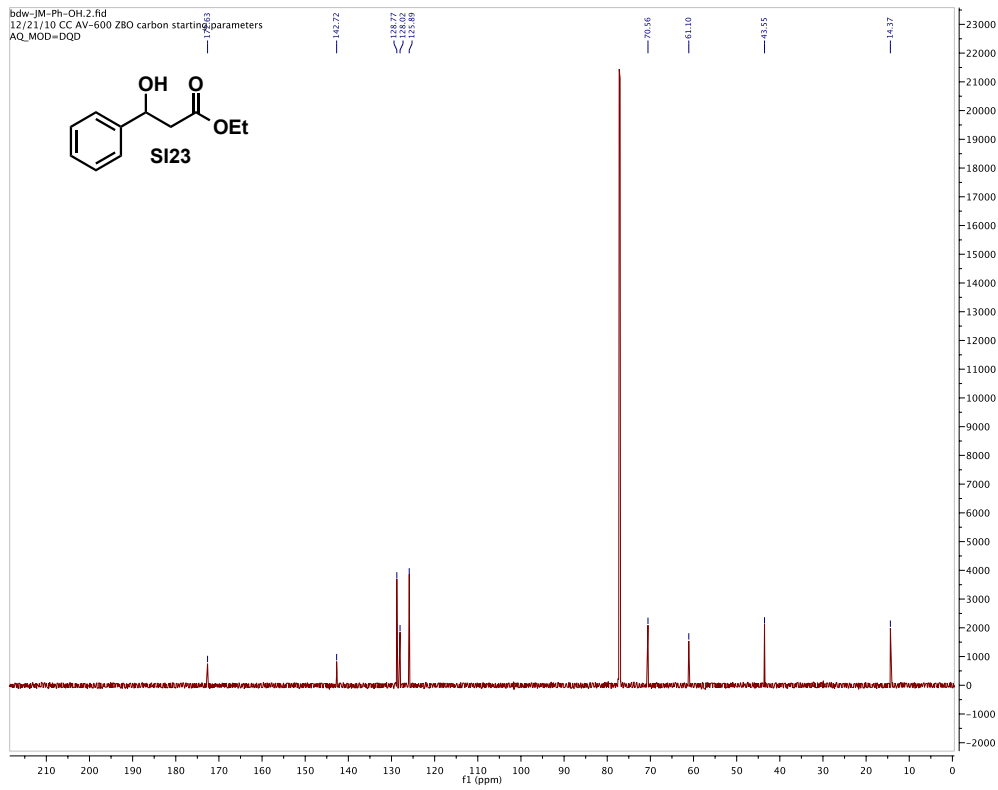

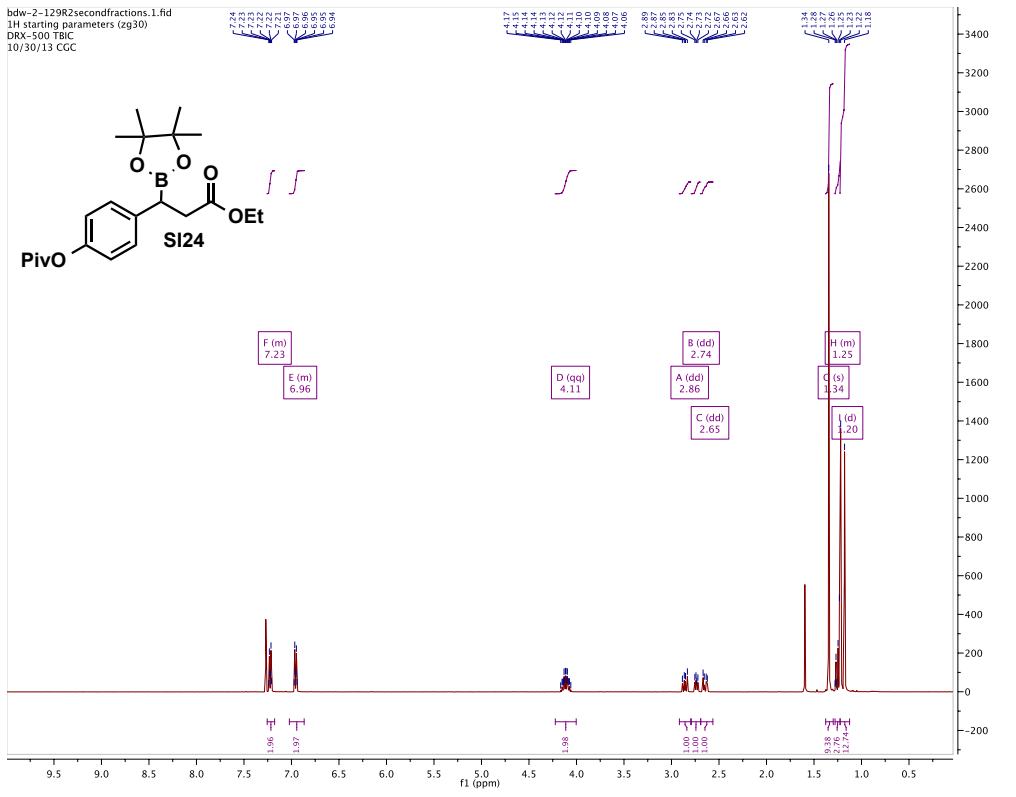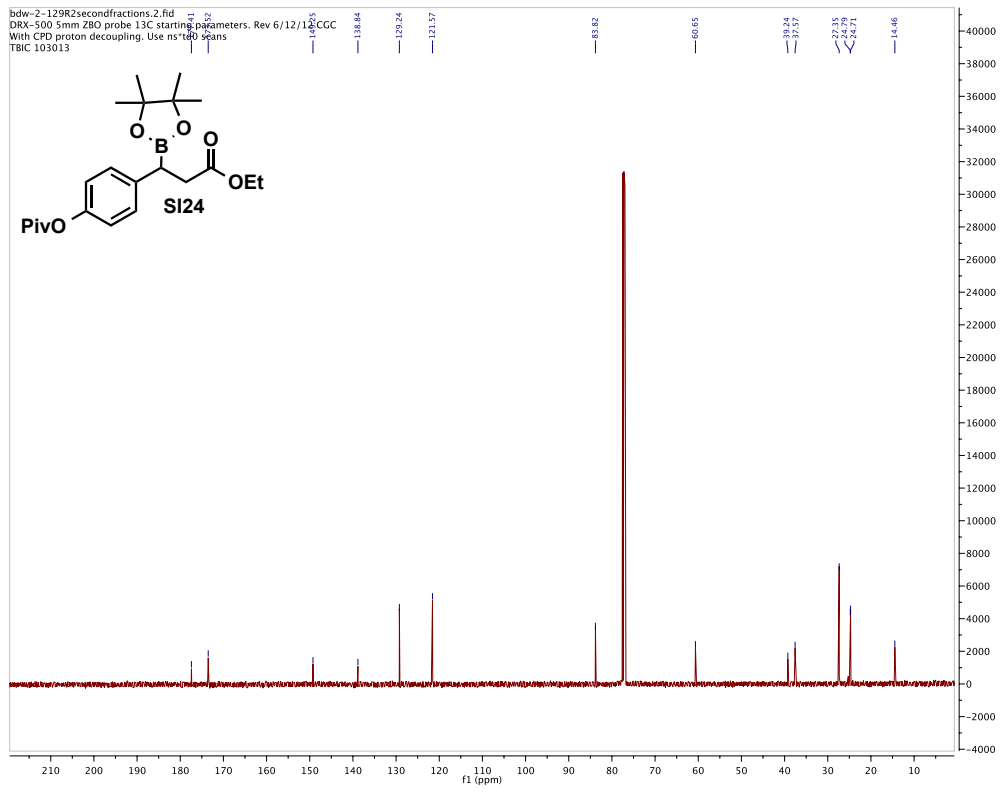

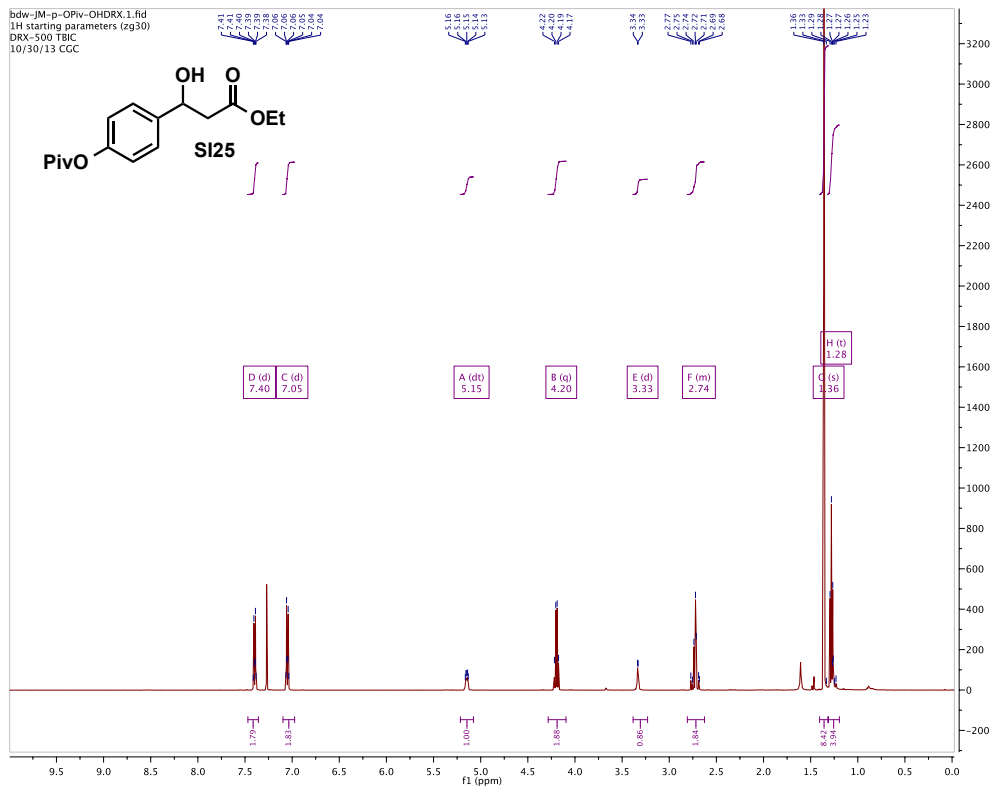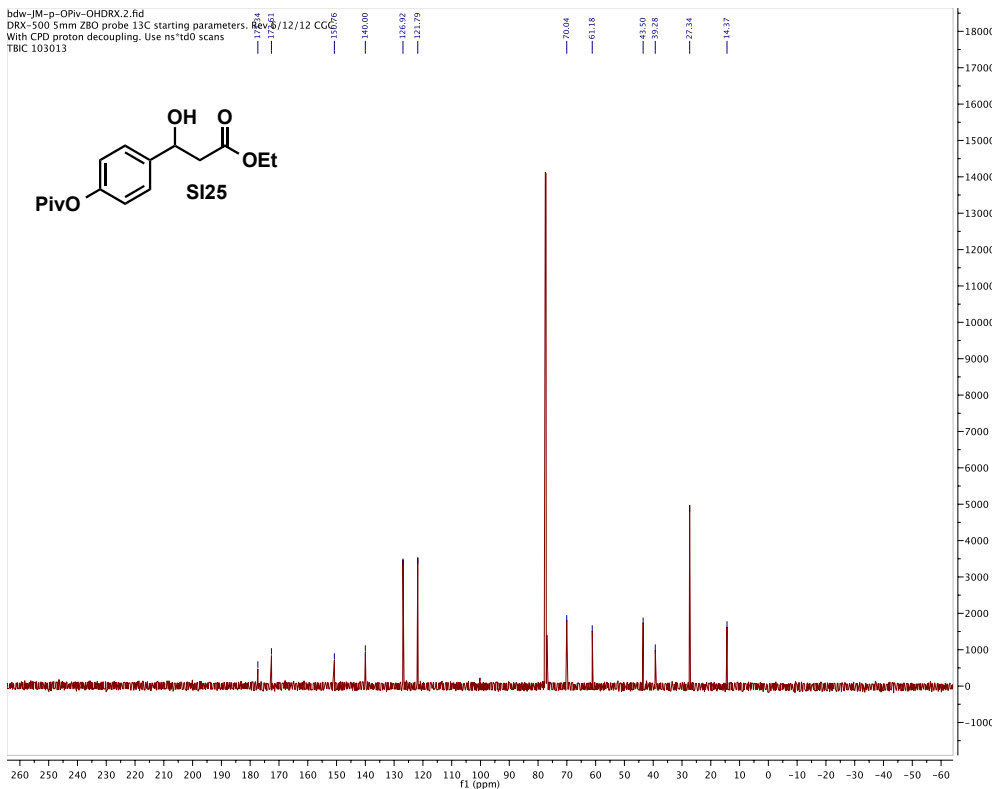

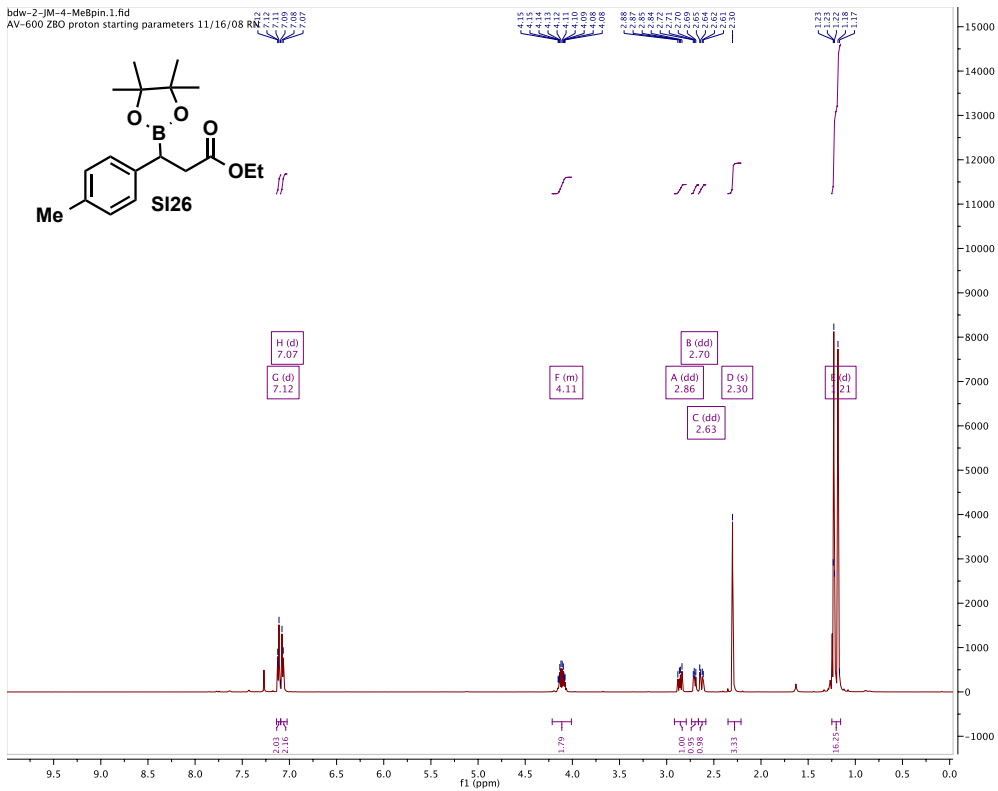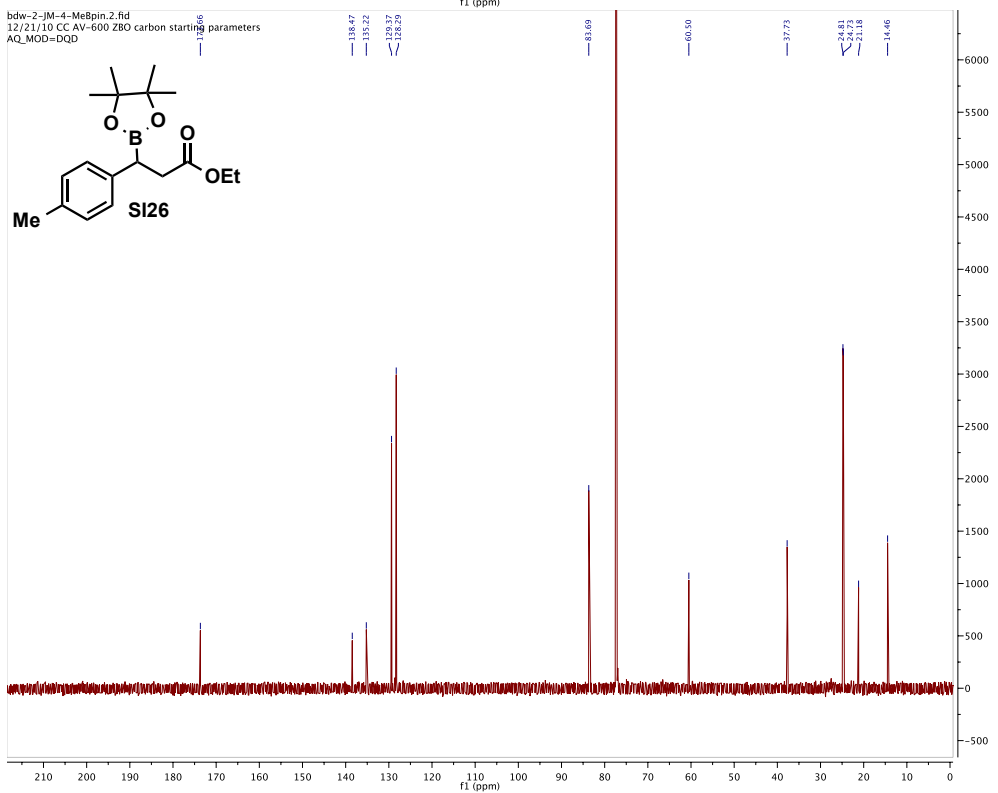

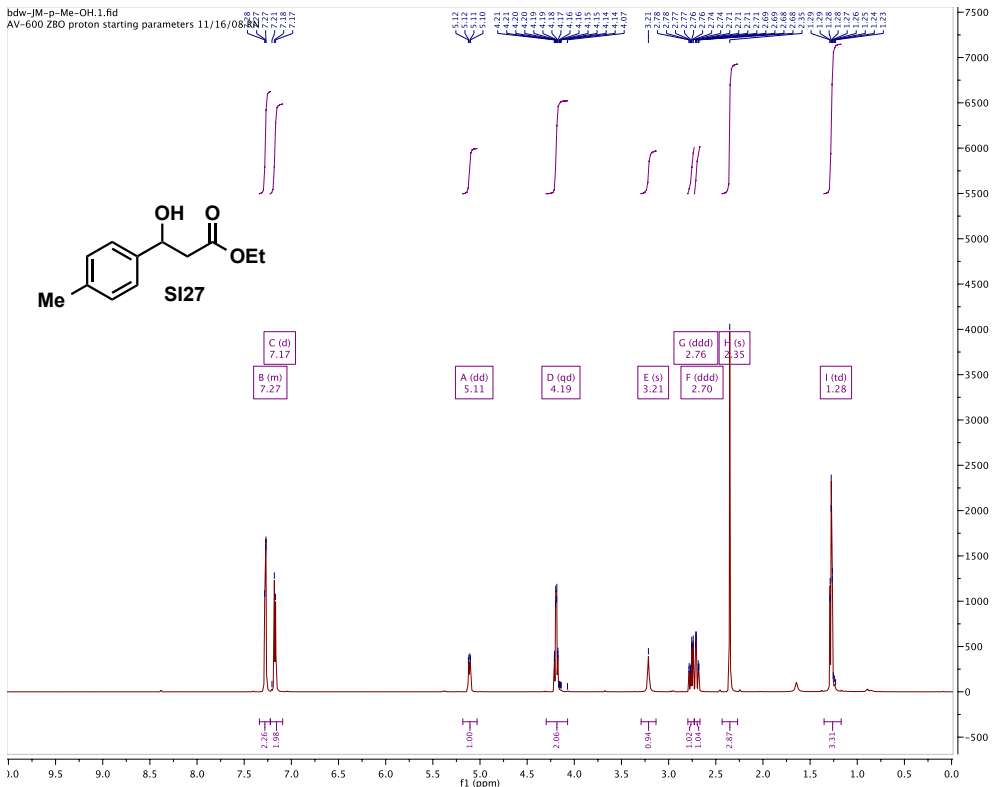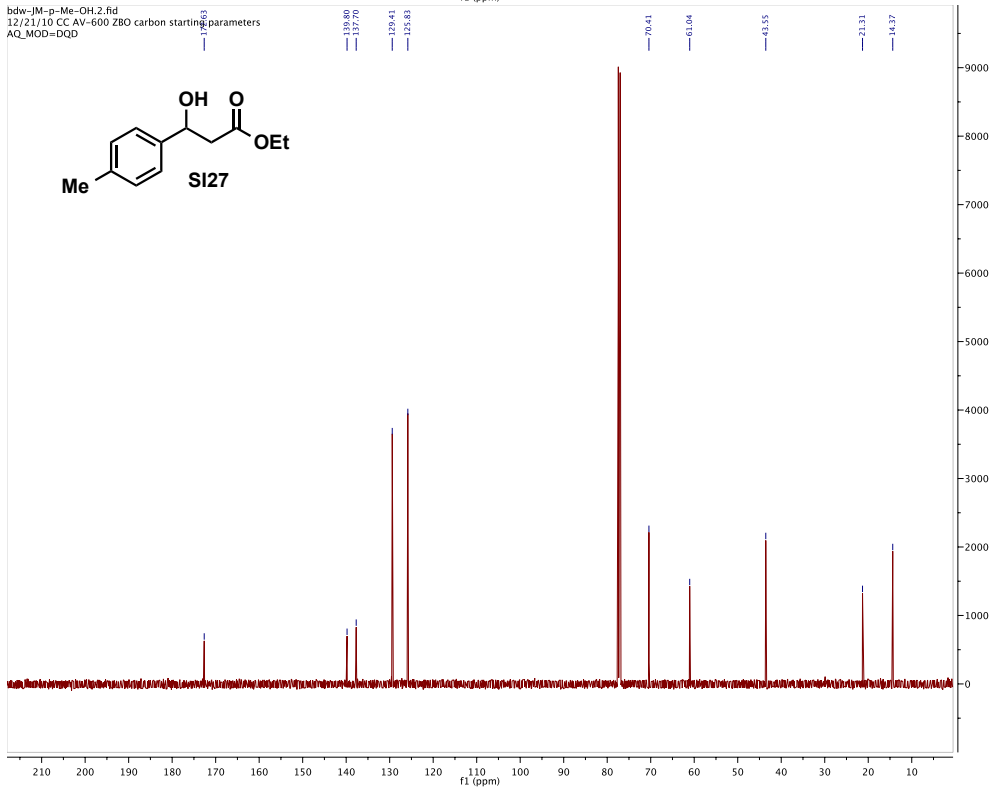

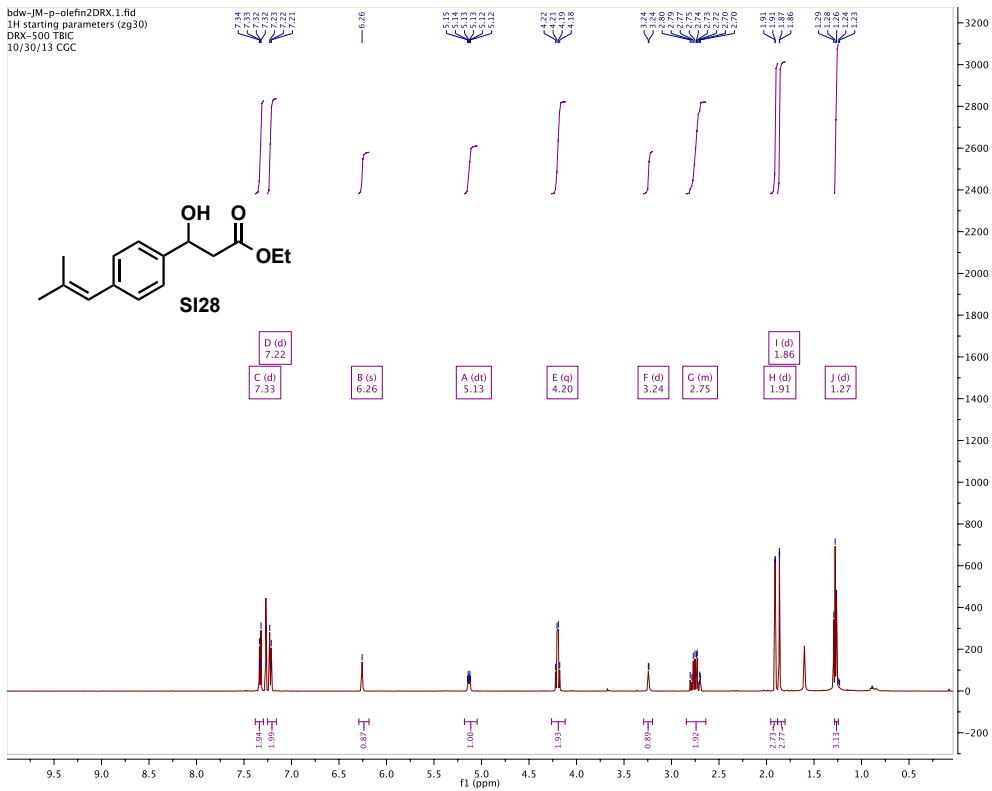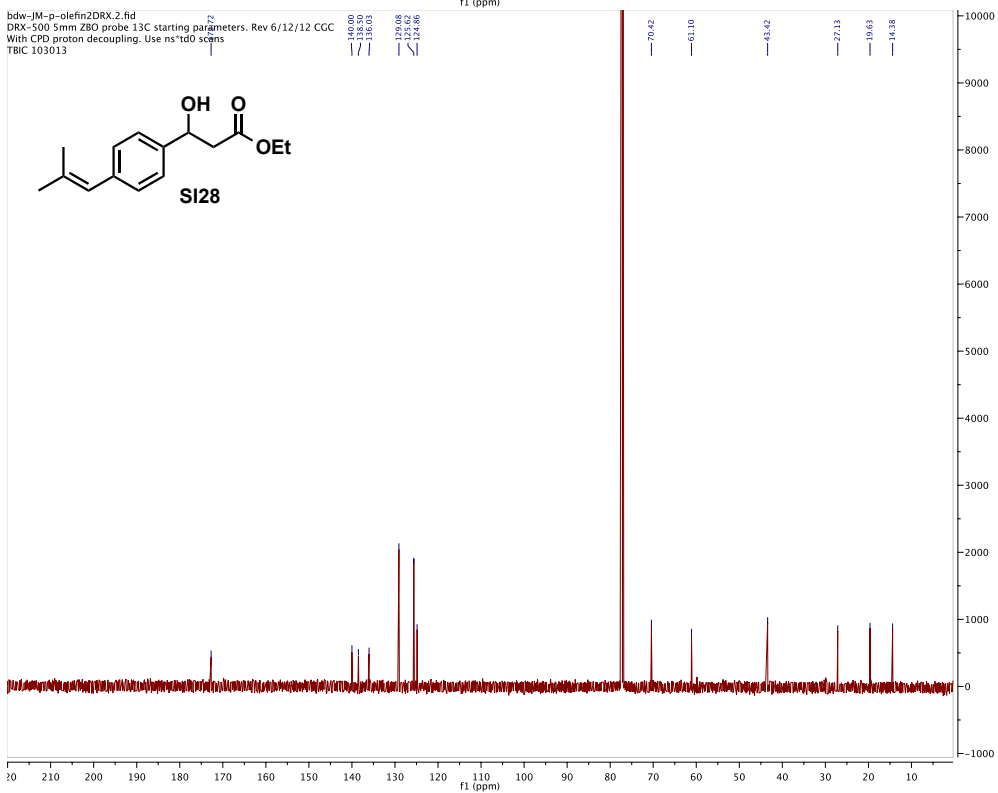

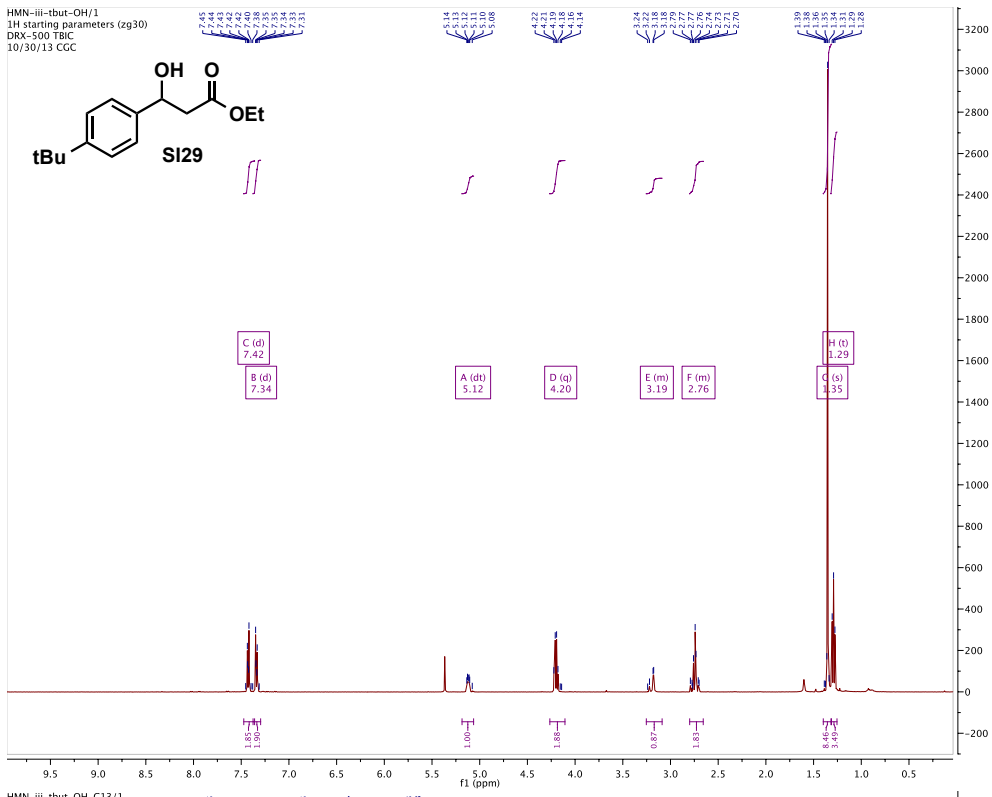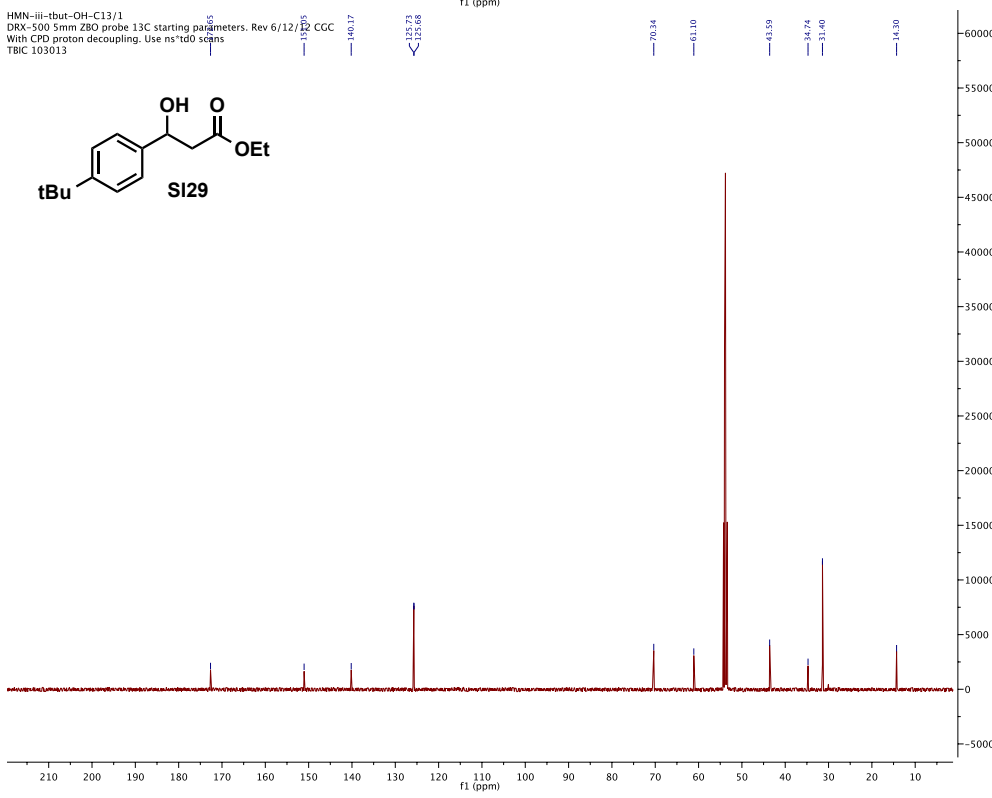

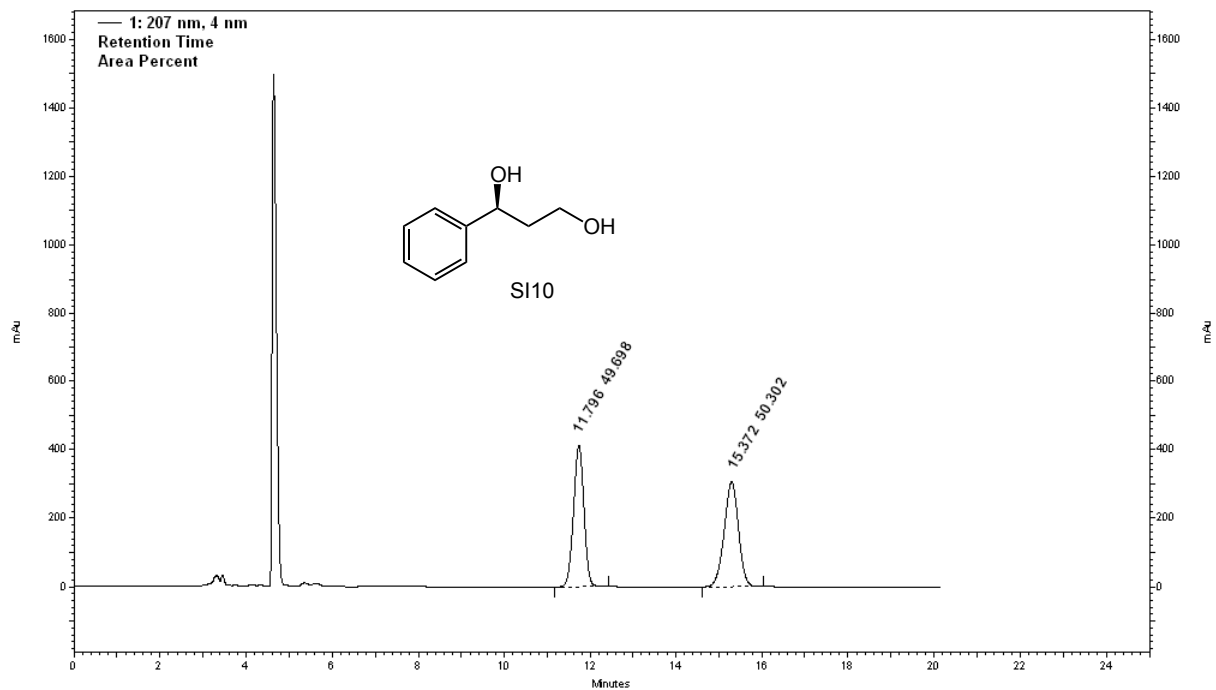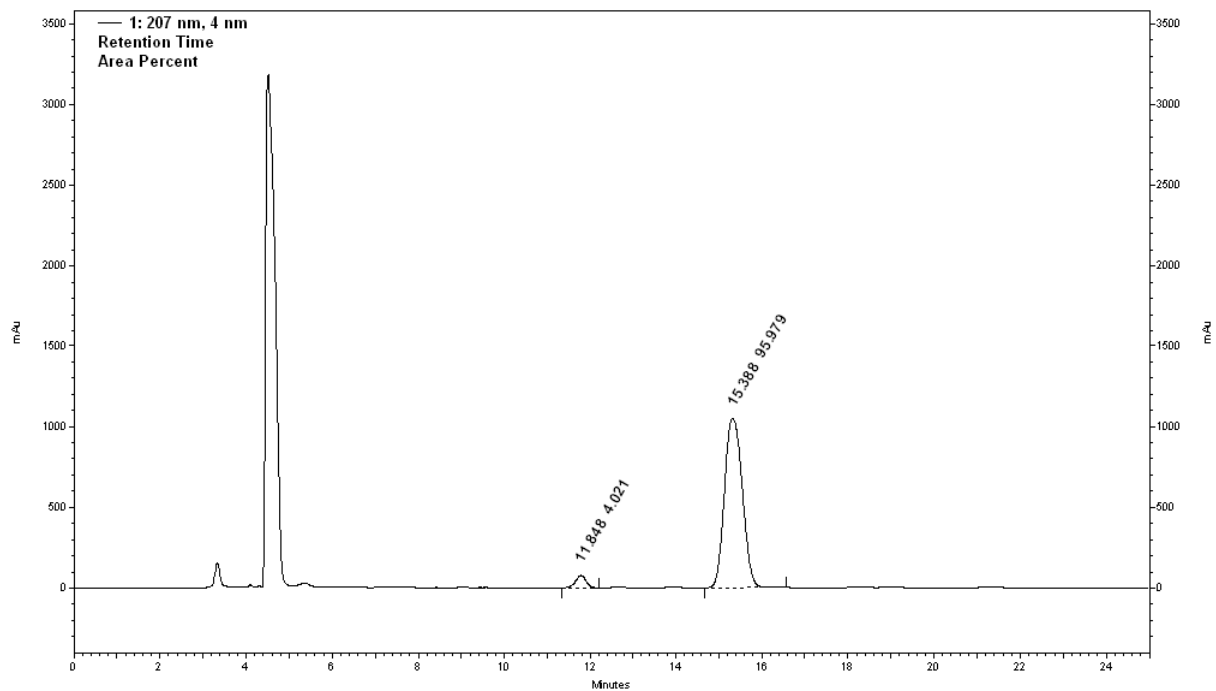

| retention time (min) | area (%) |
|----------------------|----------|
| 11.8                 | 4.0      |
| 15.4                 | 96.0     |



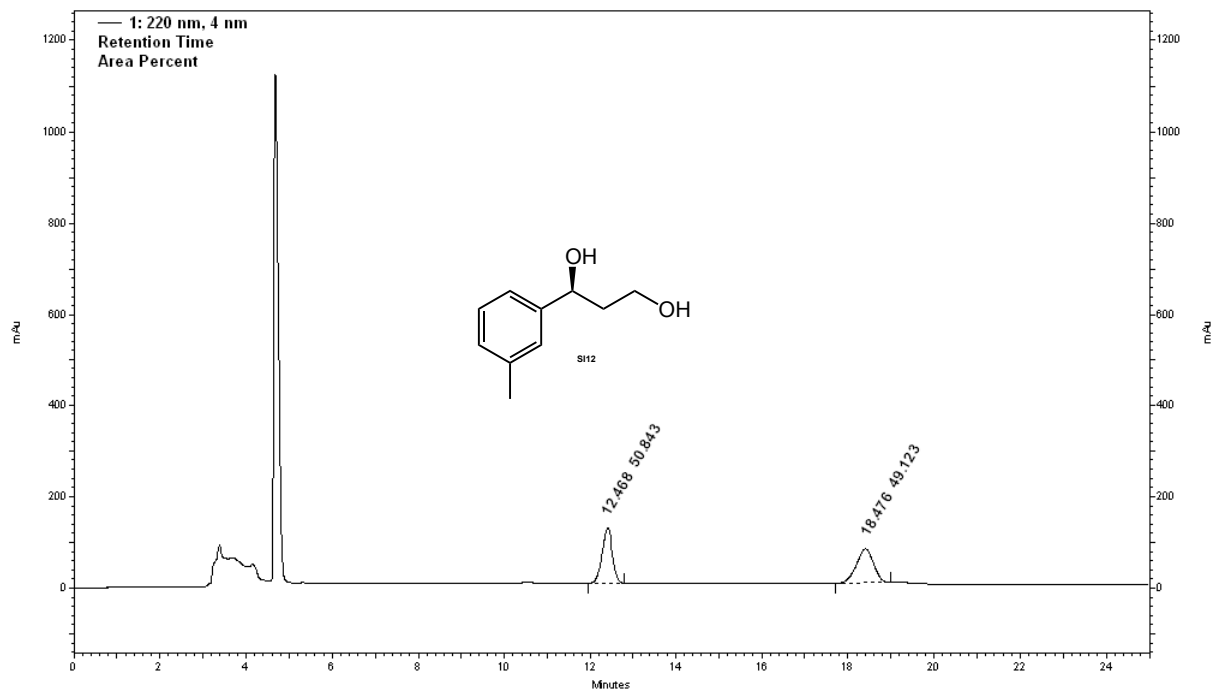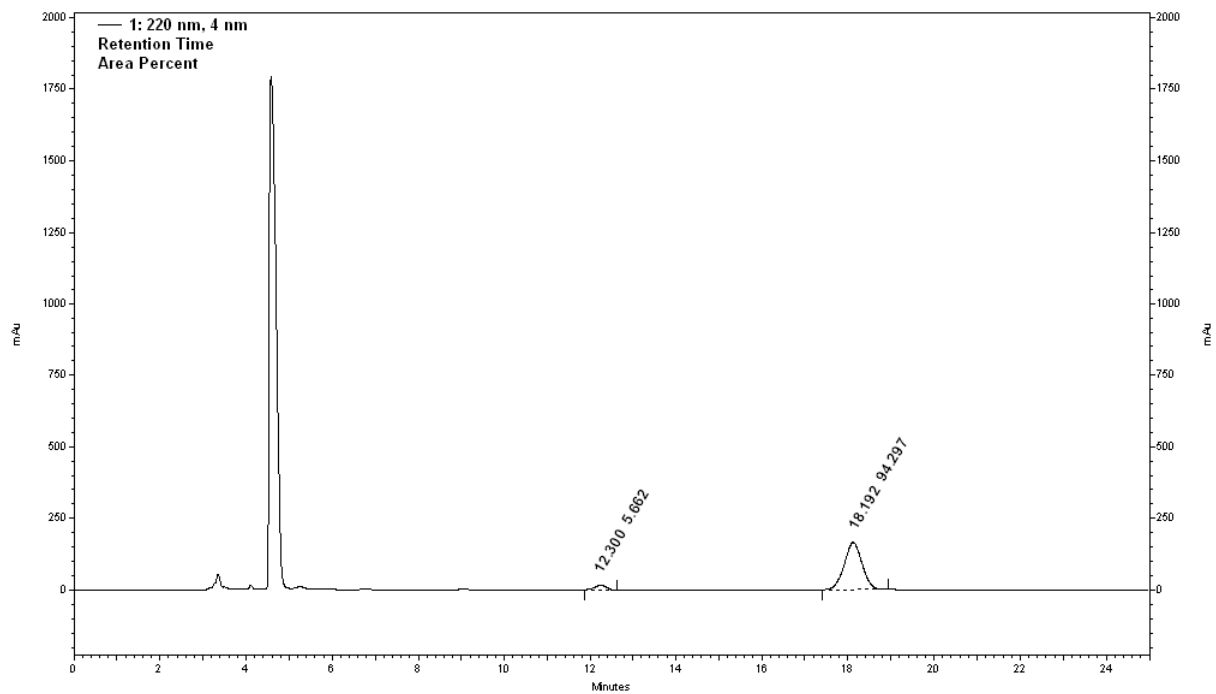

| retention time (min) | area (%) |
|----------------------|----------|
| 12.3                 | 5.7      |
| 18.2                 | 94.3     |

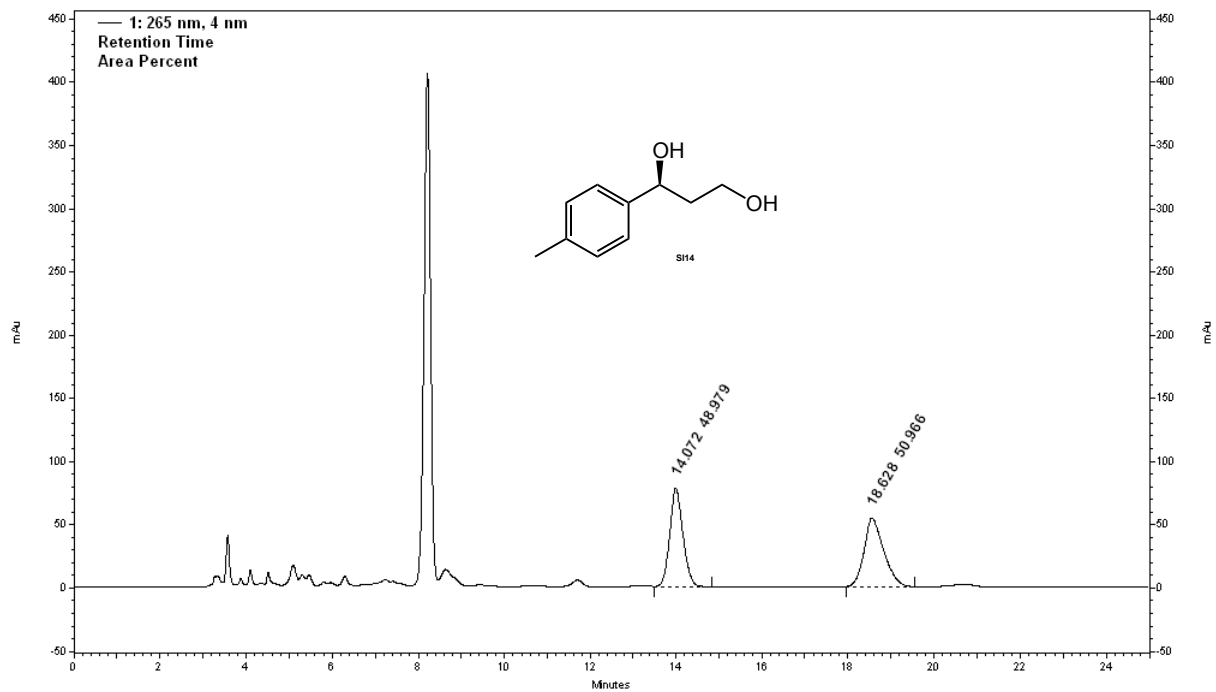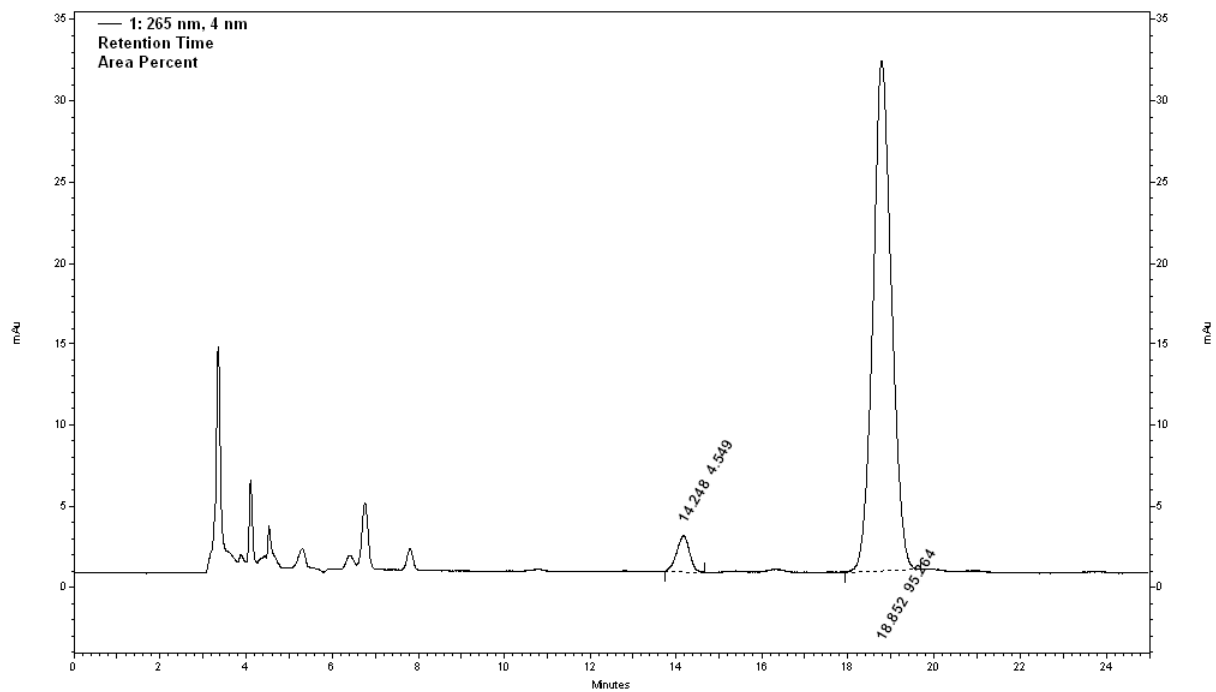

| retention time (min) | area (%) |
|----------------------|----------|
| 14.2                 | 4.5      |
| 18.9                 | 95.5     |

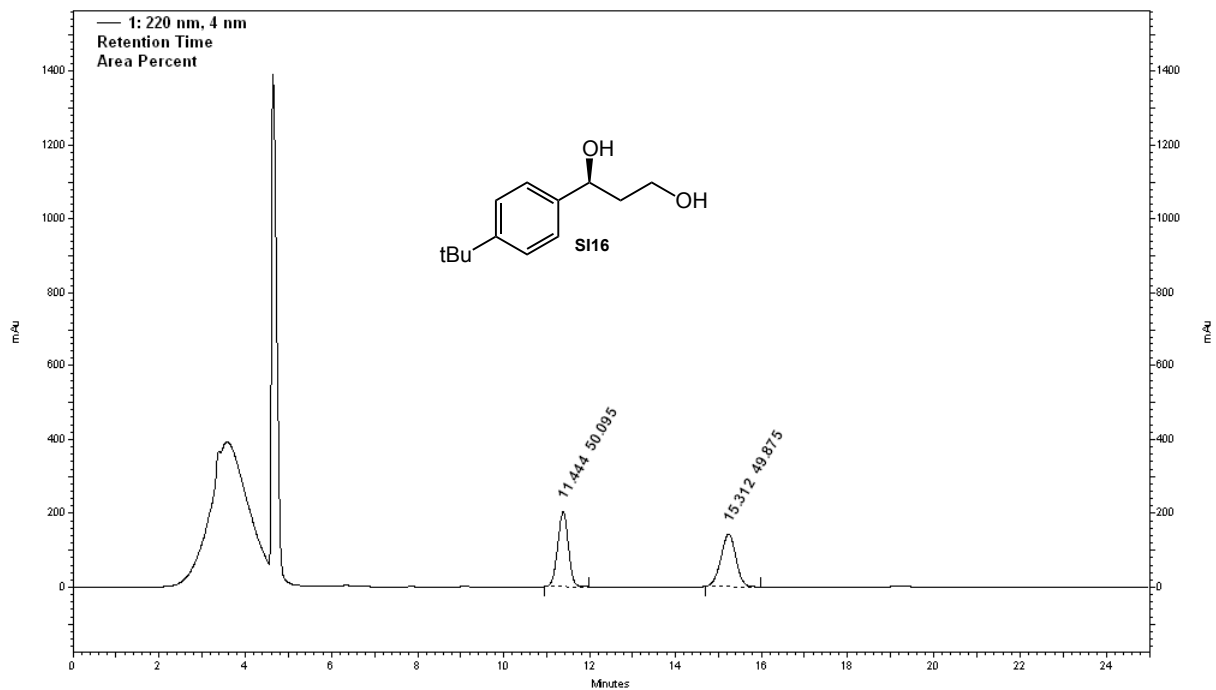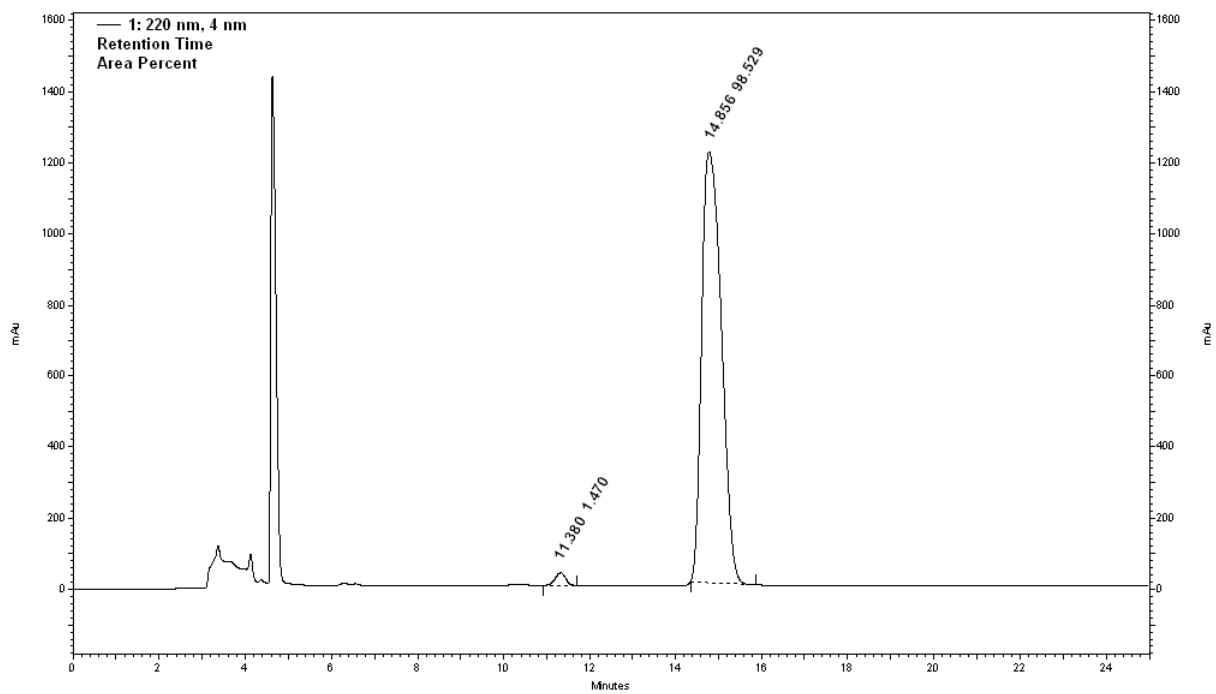

| retention time (min) | area (%) |
|----------------------|----------|
| 11.4                 | 1.5      |
| 14.9                 | 98.5     |

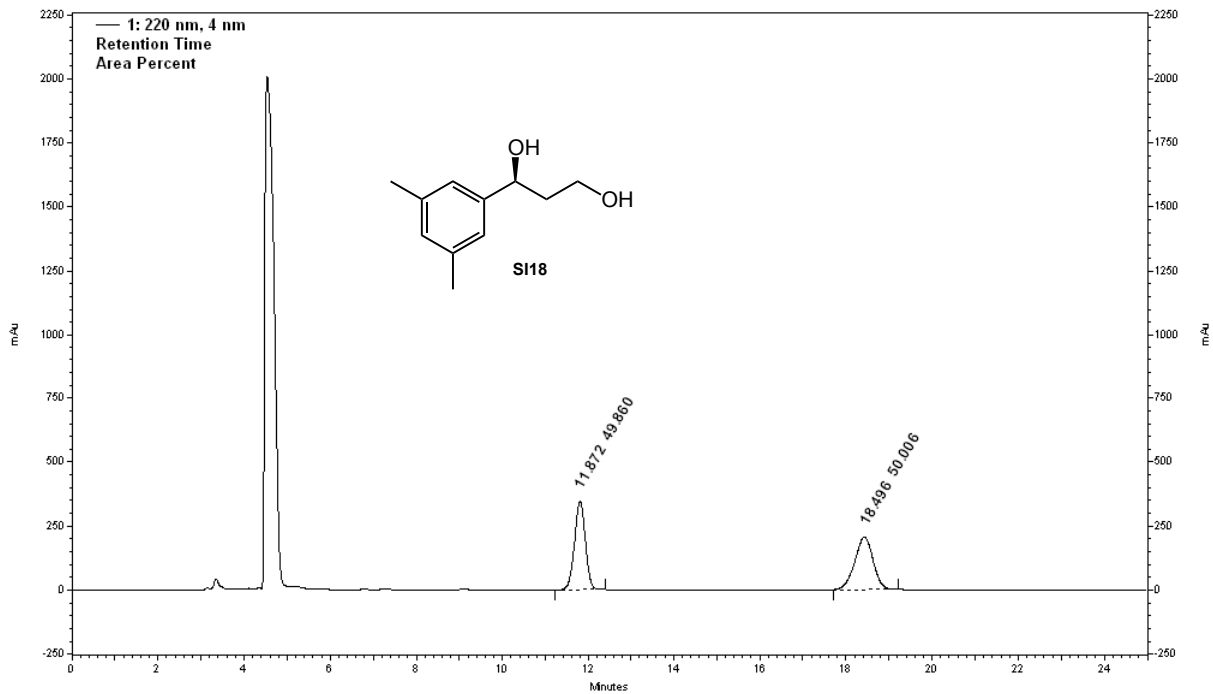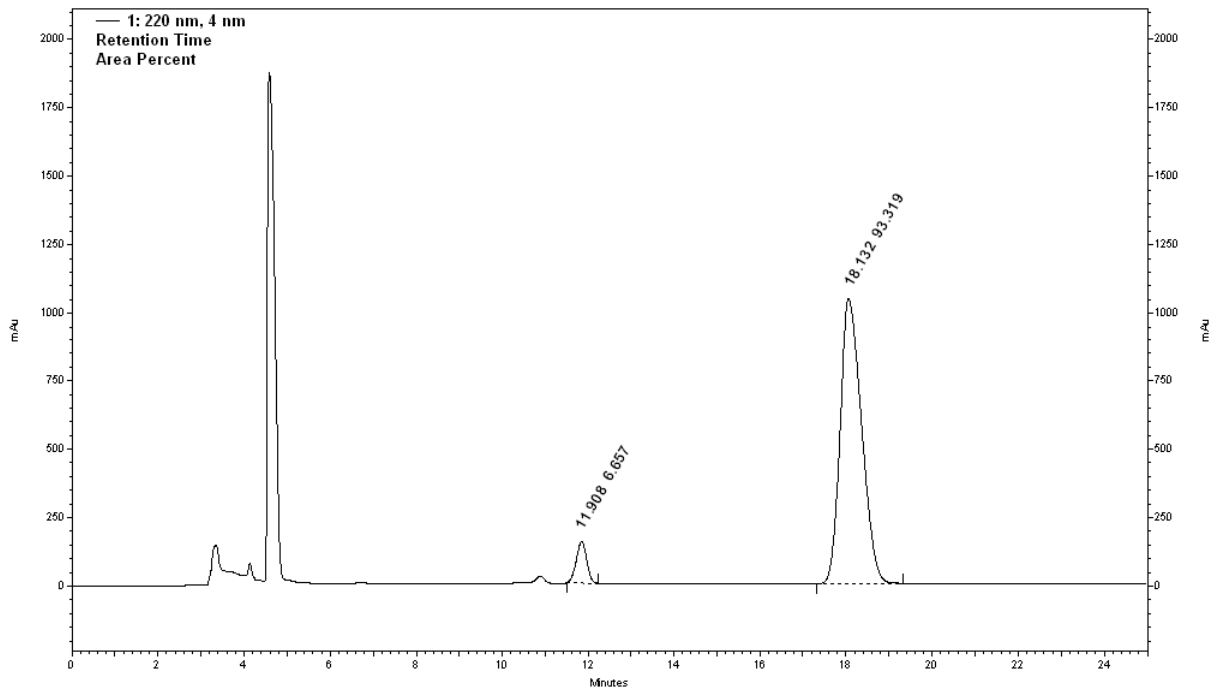

| retention time (min) | area (%) |
|----------------------|----------|
| 11.9                 | 6.7      |
| 18.1                 | 93.3     |

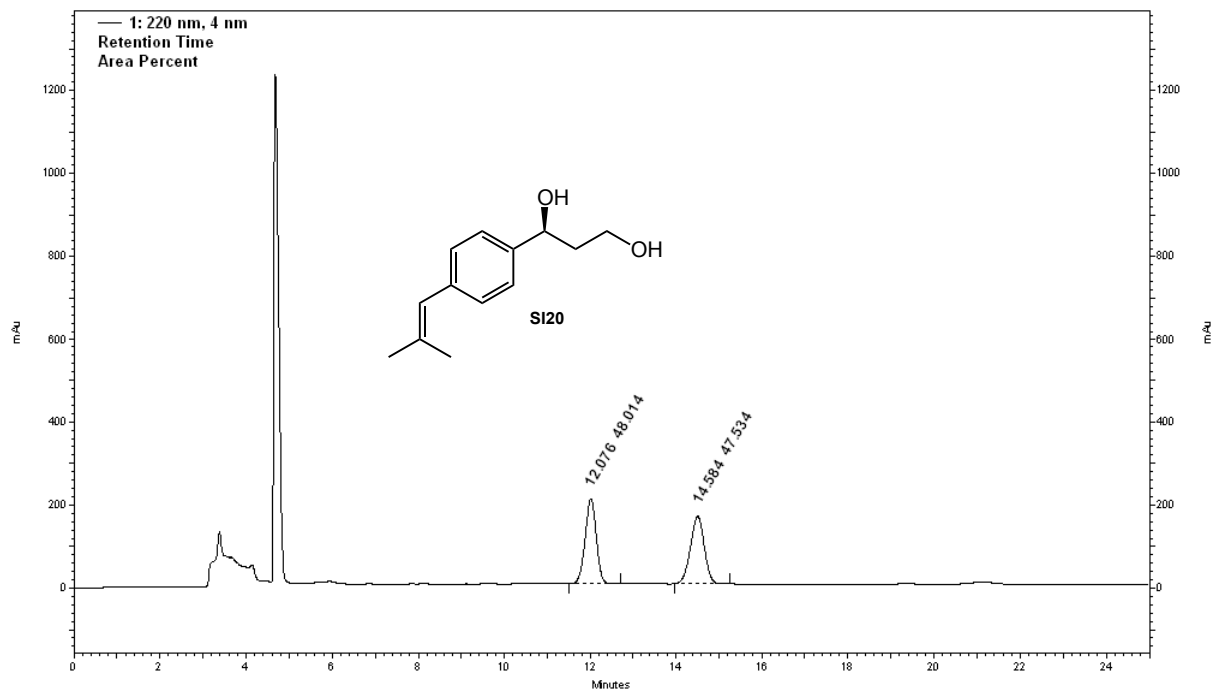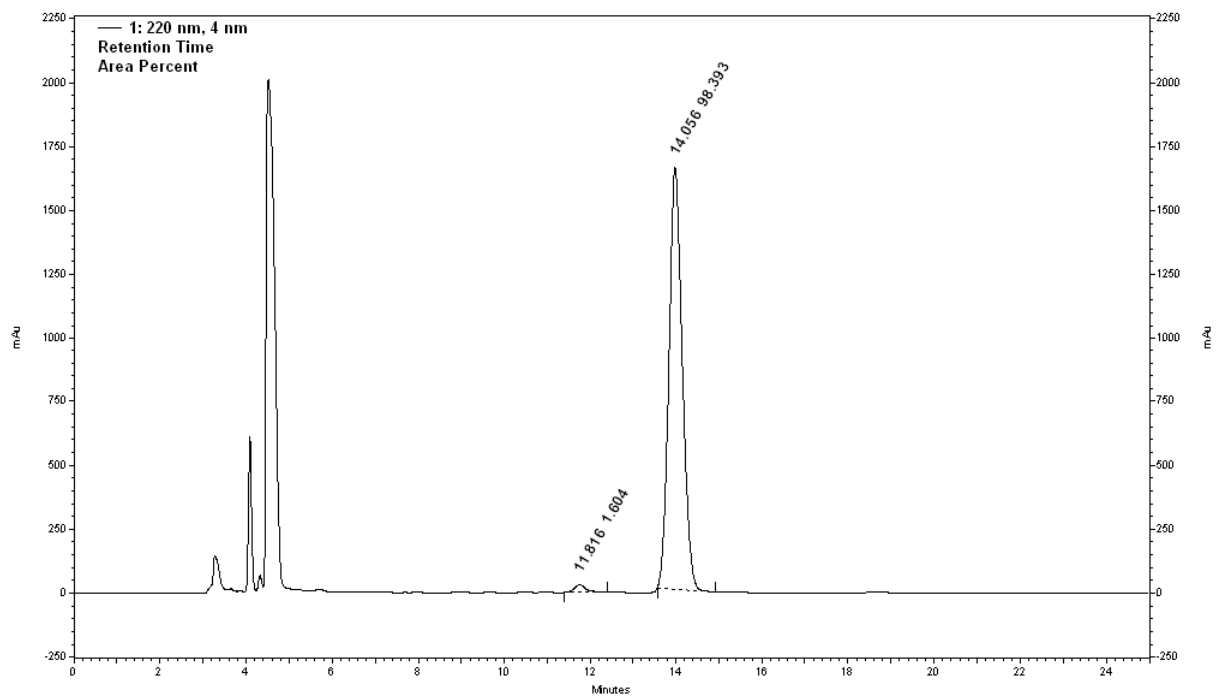

| retention time (min) | area (%) |
|----------------------|----------|
| 11.8                 | 1.6      |
| 14.1                 | 98.4     |

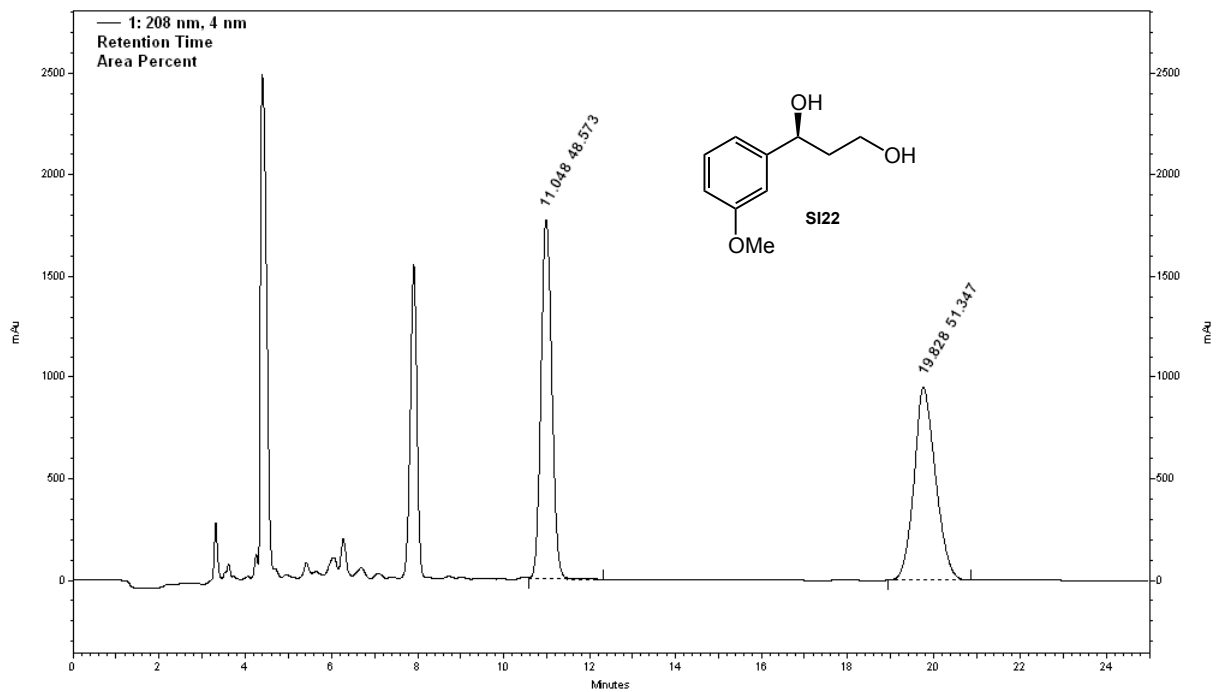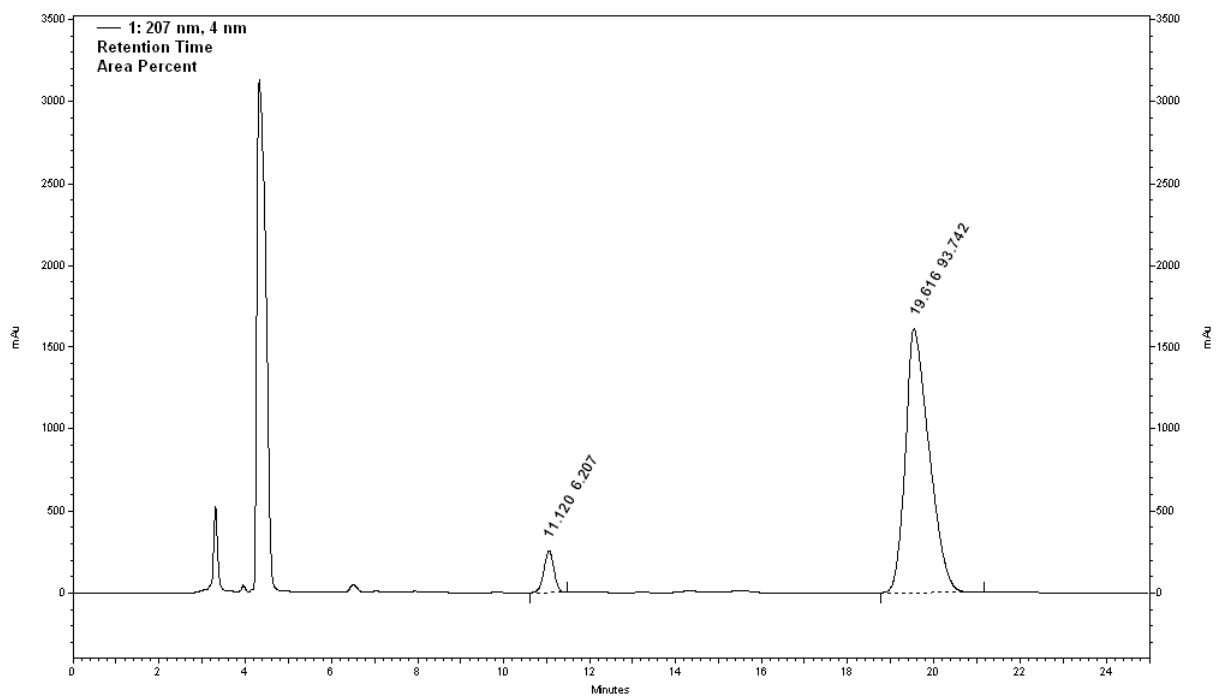

| retention time (min) | area (%) |
|----------------------|----------|
| 11.1                 | 6.2      |
| 19.6                 | 93.7     |

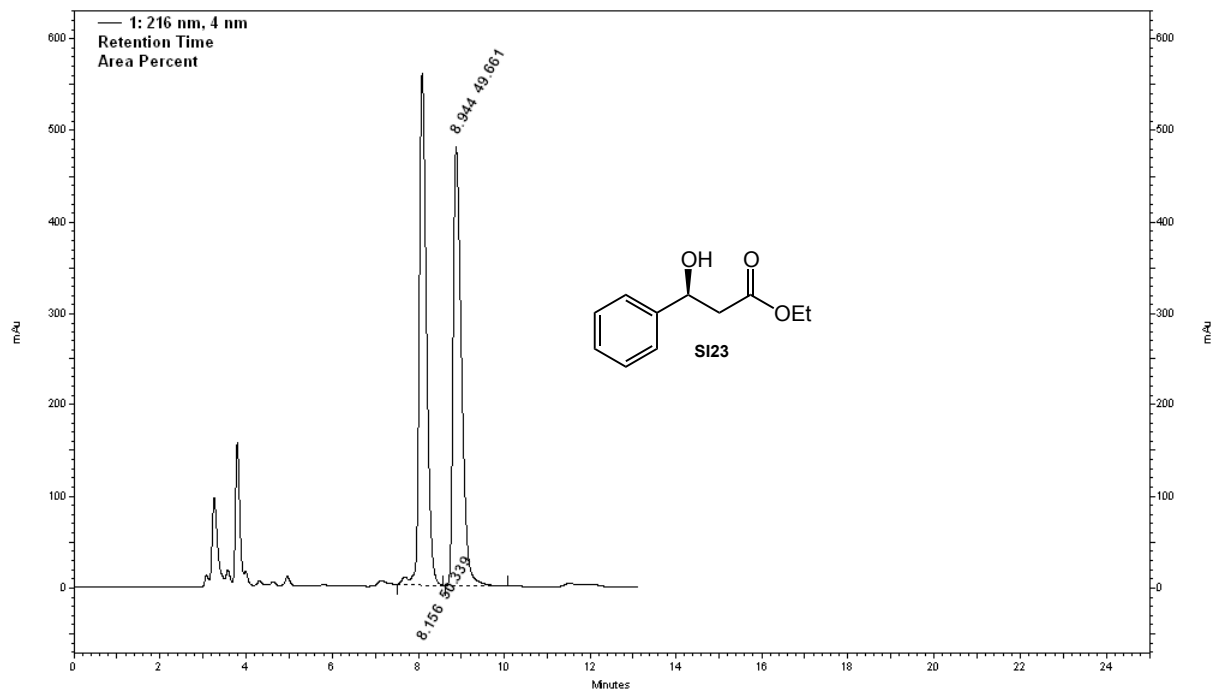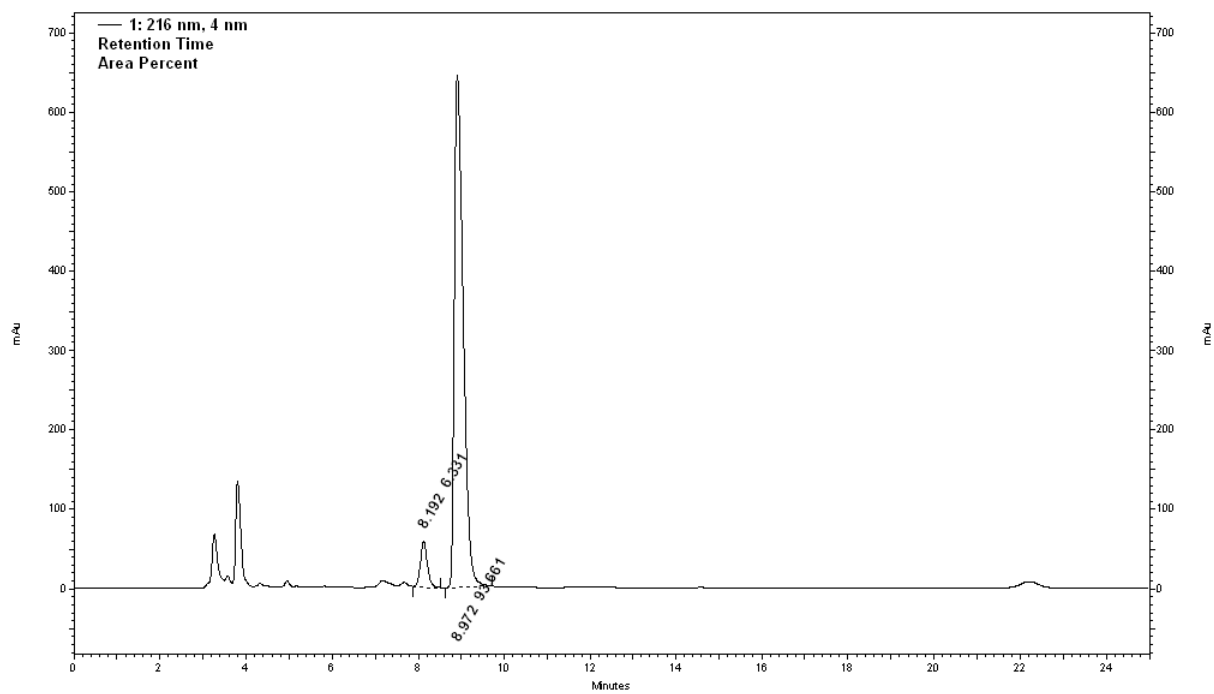

| retention time (min) | area (%) |
|----------------------|----------|
| 8.2                  | 6.3      |
| 9.0                  | 93.7     |

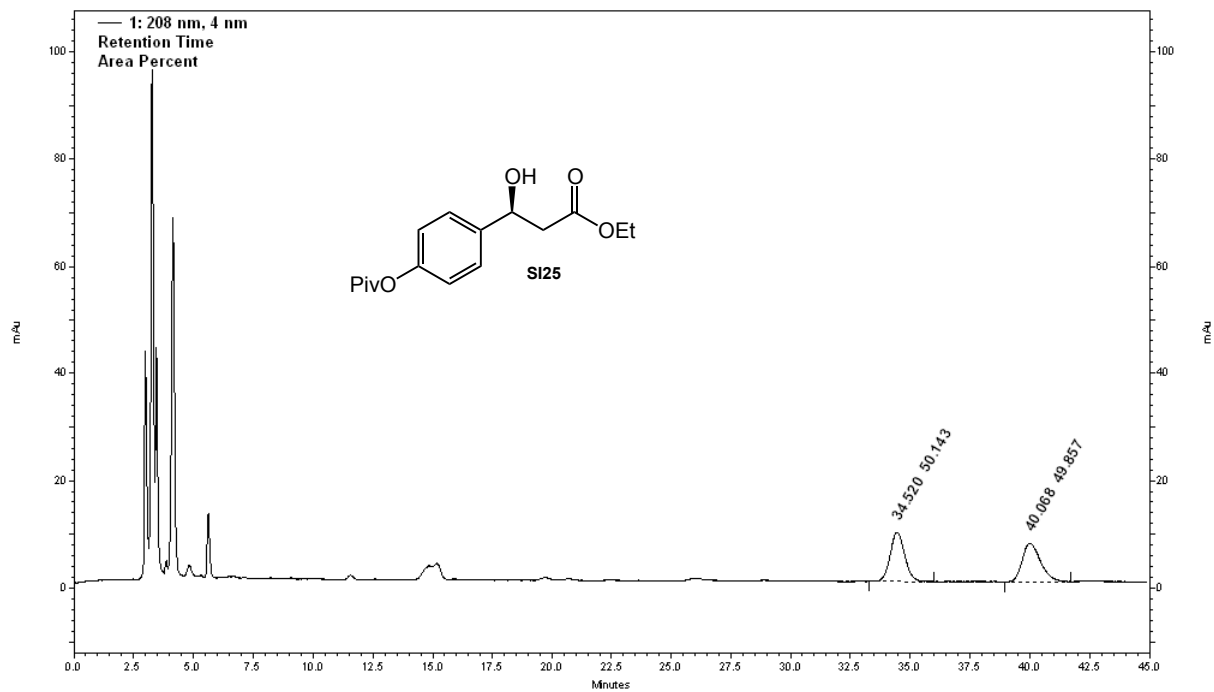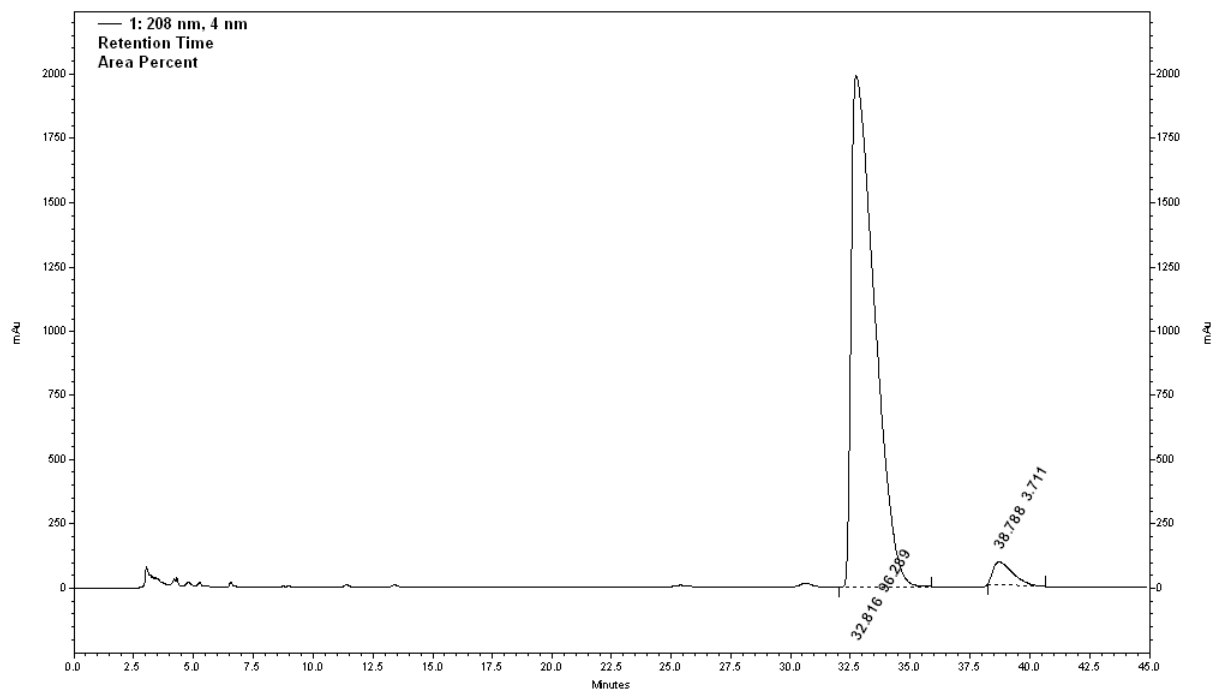

| retention time (min) | area (%) |
|----------------------|----------|
| 32.8                 | 96.3     |
| 38.8                 | 3.7      |



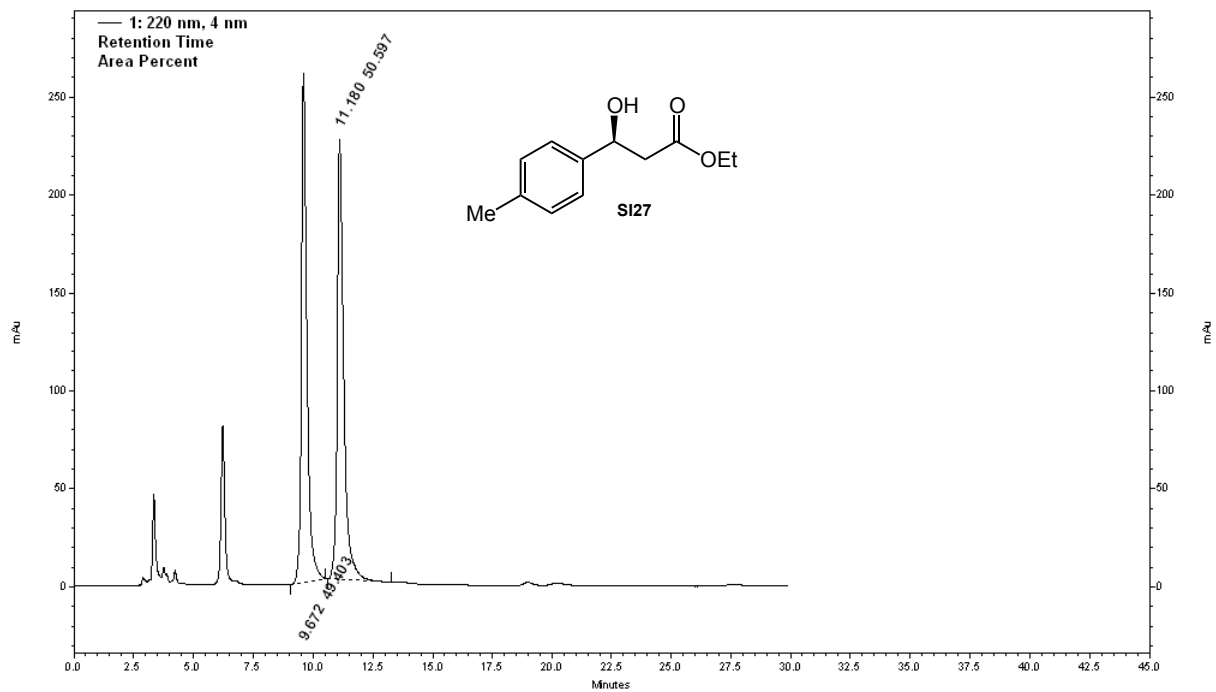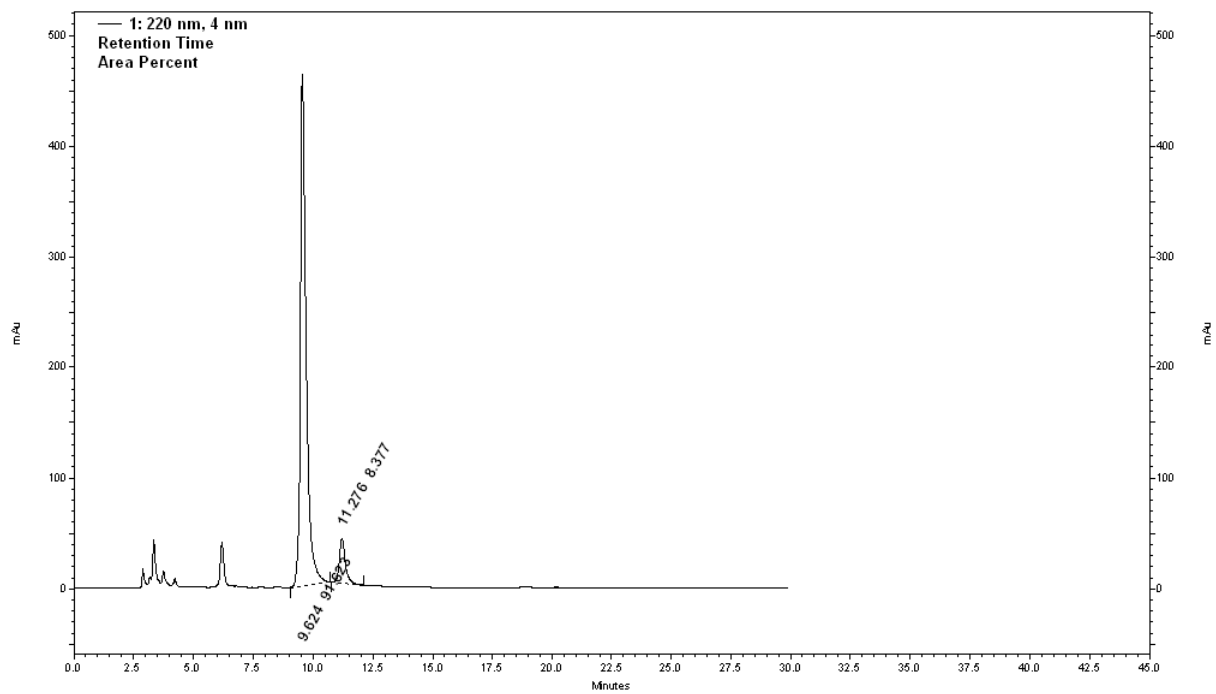

| retention time (min) | area (%) |
|----------------------|----------|
| 9.6                  | 91.6     |
| 11.3                 | 8.4      |

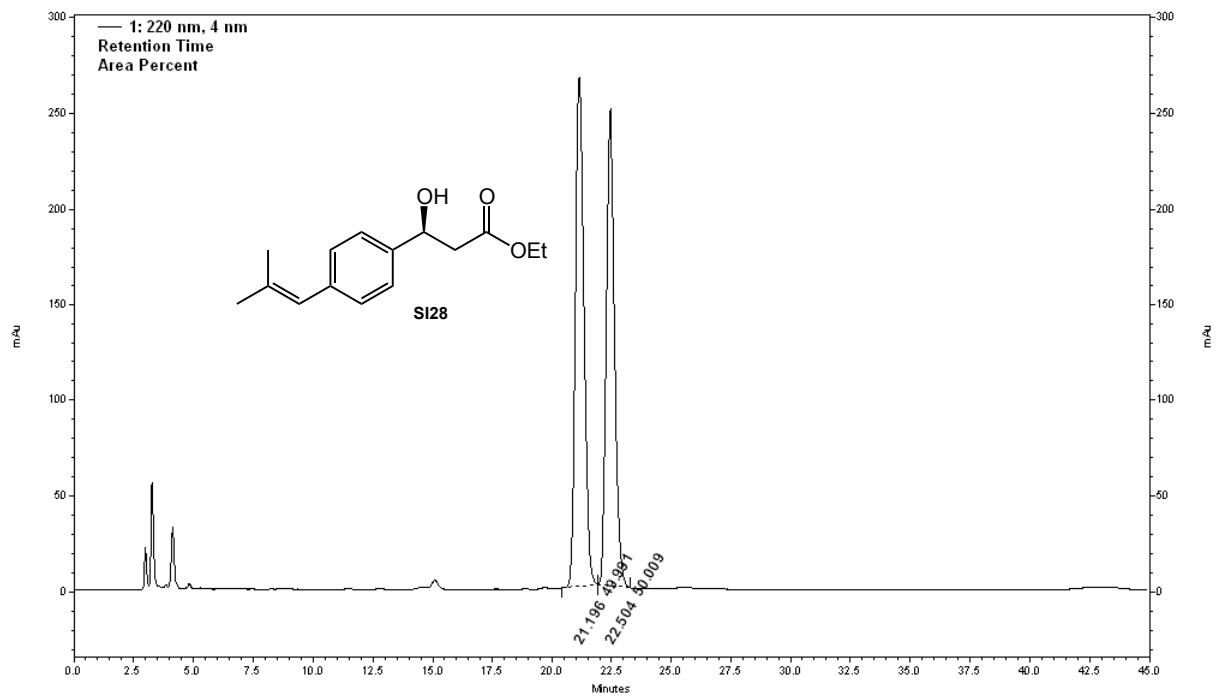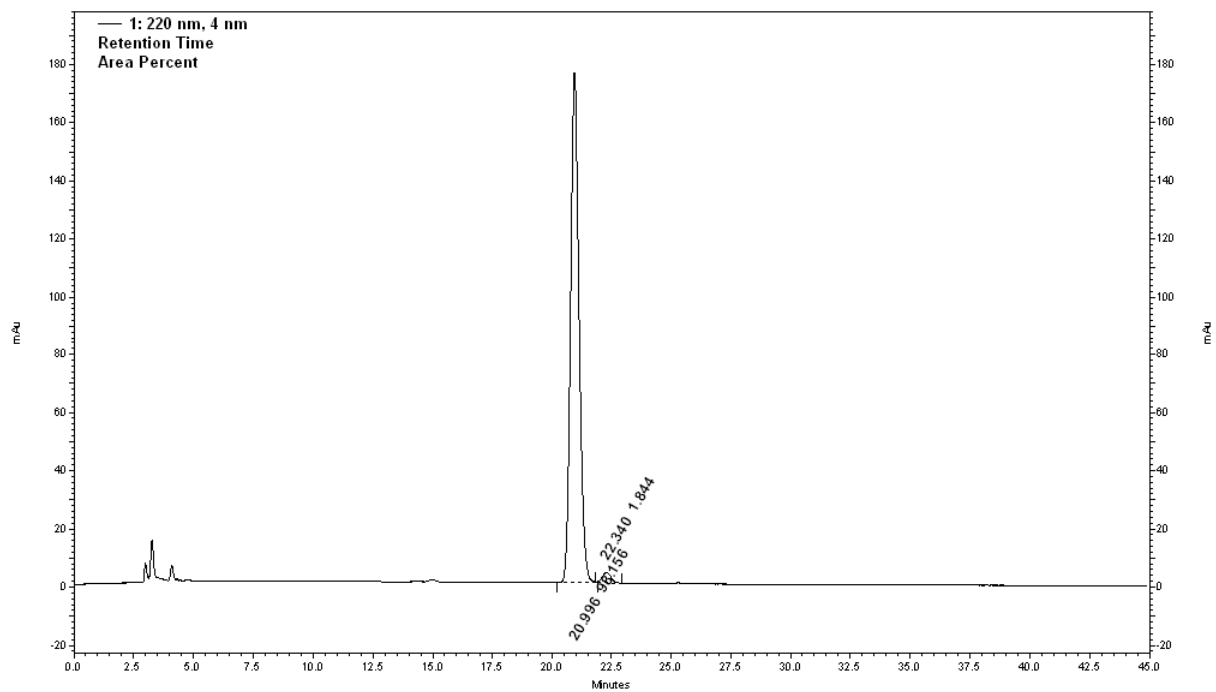

| retention time (min) | area (%) |
|----------------------|----------|
| 21.0                 | 98.2     |
| 22.3                 | 1.8      |

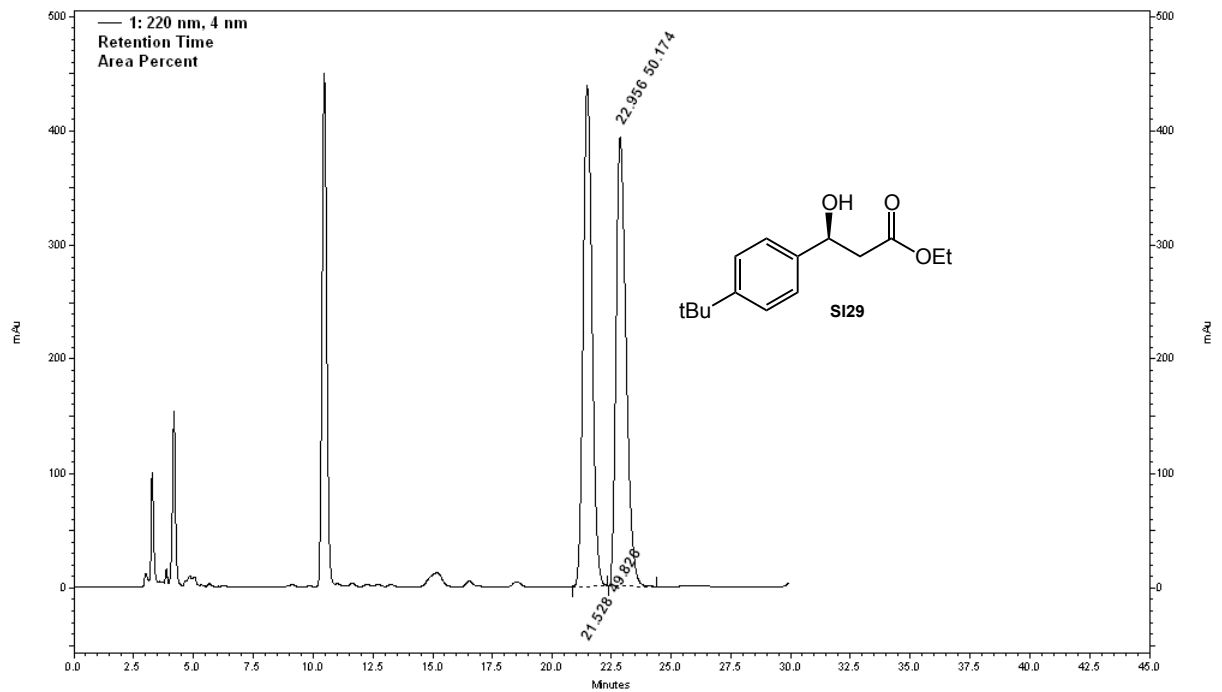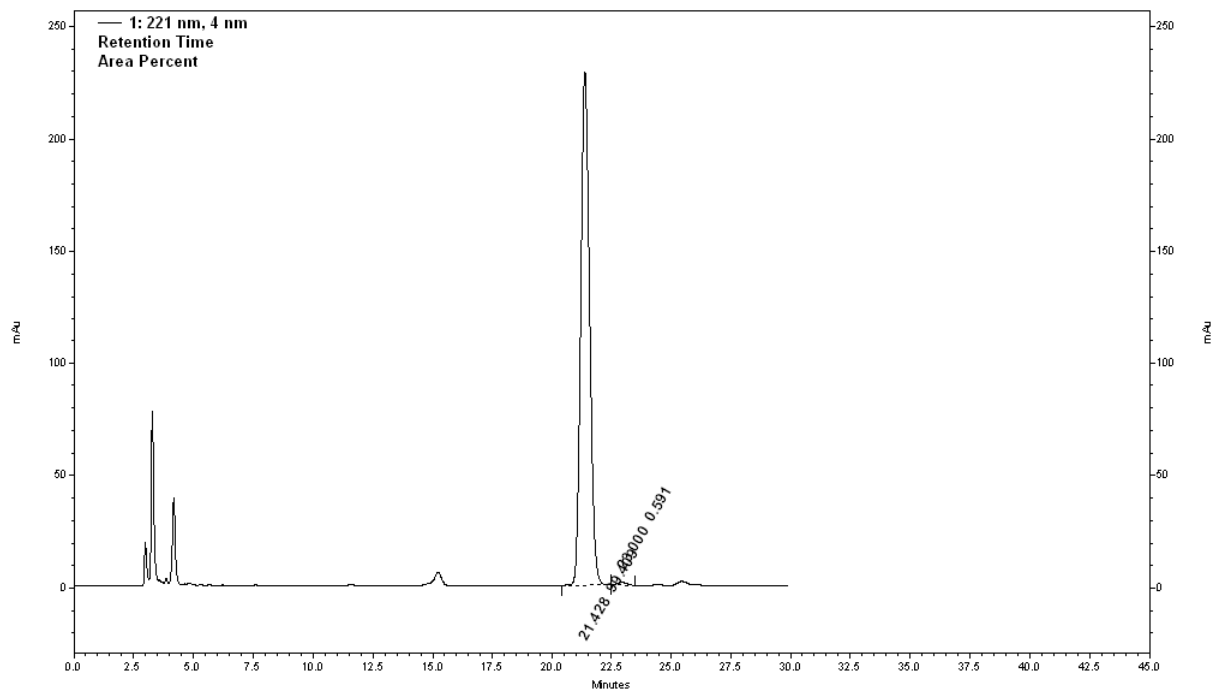

| retention time (min) | area (%) |
|----------------------|----------|
| 21.4                 | 99.4     |
| 23.0                 | 0.5      |
